# Supplementary material for: A study of trust mining algorithms for beacon nodes in large-scale network environments
Source: PeerJ Comput Sci. 2025 Apr 22;11:e2755. doi: 10.7717/peerj-cs.2755 (PMC12190256; doi:10.7717/peerj-cs.2755)
Supplement: Supplemental Information 2 [file peerj-cs-11-2755-s002.xlsx]

## Sheet: Sheet1
1	5	12	21	23	25	36	39	42	53	56	57	67	71	79	88	90	94	97	104	113	120	128
1	5	12	21	23	25	36	39	42	53	56	57	67	71	79	88	90	94	97	104	108	120	128
1	5	12	21	23	25	36	39	42	50	56	57	67	71	79	88	90	94	97	104	113	120	128
1	5	12	21	23	25	36	39	42	50	56	57	67	71	79	88	90	94	97	104	108	120	128
1	5	12	21	23	25	36	39	42	44	56	57	67	71	79	88	90	94	97	104	113	120	128
1	5	12	21	23	25	36	39	42	44	56	57	67	71	79	88	90	94	97	104	108	120	128
1	5	12	21	23	26	36	39	42	53	56	57	67	71	79	88	90	94	97	104	113	120	128
1	5	12	21	23	26	36	39	42	53	56	57	67	71	79	88	90	94	97	104	108	120	128
1	5	12	21	23	26	36	39	42	50	56	57	67	71	79	88	90	94	97	104	113	120	128
1	5	12	21	23	26	36	39	42	50	56	57	67	71	79	88	90	94	97	104	108	120	128
1	5	12	21	23	26	36	39	42	44	56	57	67	71	79	88	90	94	97	104	113	120	128
1	5	12	21	23	26	36	39	42	44	56	57	67	71	79	88	90	94	97	104	108	120	128
1	5	12	22	23	25	36	39	42	53	56	57	67	71	79	88	90	94	97	104	113	120	128
1	5	12	22	23	25	36	39	42	53	56	57	67	71	79	88	90	94	97	104	108	120	128
1	5	12	22	23	25	36	39	42	50	56	57	67	71	79	88	90	94	97	104	113	120	128
1	5	12	22	23	25	36	39	42	50	56	57	67	71	79	88	90	94	97	104	108	120	128
1	5	12	22	23	25	36	39	42	44	56	57	67	71	79	88	90	94	97	104	113	120	128
1	5	12	22	23	25	36	39	42	44	56	57	67	71	79	88	90	94	97	104	108	120	128
1	5	12	22	23	26	36	39	42	53	56	57	67	71	79	88	90	94	97	104	113	120	128
1	5	12	22	23	26	36	39	42	53	56	57	67	71	79	88	90	94	97	104	108	120	128
1	5	12	22	23	26	36	39	42	50	56	57	67	71	79	88	90	94	97	104	113	120	128
1	5	12	22	23	26	36	39	42	50	56	57	67	71	79	88	90	94	97	104	108	120	128
1	5	12	22	23	26	36	39	42	44	56	57	67	71	79	88	90	94	97	104	113	120	128
1	5	12	22	23	26	36	39	42	44	56	57	67	71	79	88	90	94	97	104	108	120	128
1	5	9	21	23	25	36	39	42	53	56	57	67	71	79	88	90	94	97	104	113	120	128
1	5	9	21	23	25	36	39	42	53	56	57	67	71	79	88	90	94	97	104	108	120	128
1	5	9	21	23	25	36	39	42	50	56	57	67	71	79	88	90	94	97	104	113	120	128
1	5	9	21	23	25	36	39	42	50	56	57	67	71	79	88	90	94	97	104	108	120	128
1	5	9	21	23	25	36	39	42	44	56	57	67	71	79	88	90	94	97	104	113	120	128
1	5	9	21	23	25	36	39	42	44	56	57	67	71	79	88	90	94	97	104	108	120	128
1	5	9	21	23	26	36	39	42	53	56	57	67	71	79	88	90	94	97	104	113	120	128
1	5	9	21	23	26	36	39	42	53	56	57	67	71	79	88	90	94	97	104	108	120	128
1	5	9	21	23	26	36	39	42	50	56	57	67	71	79	88	90	94	97	104	113	120	128
1	5	9	21	23	26	36	39	42	50	56	57	67	71	79	88	90	94	97	104	108	120	128
1	5	9	21	23	26	36	39	42	44	56	57	67	71	79	88	90	94	97	104	113	120	128
1	5	9	21	23	26	36	39	42	44	56	57	67	71	79	88	90	94	97	104	108	120	128
1	5	9	22	23	25	36	39	42	53	56	57	67	71	79	88	90	94	97	104	113	120	128
1	5	9	22	23	25	36	39	42	53	56	57	67	71	79	88	90	94	97	104	108	120	128
1	5	9	22	23	25	36	39	42	50	56	57	67	71	79	88	90	94	97	104	113	120	128
1	5	9	22	23	25	36	39	42	50	56	57	67	71	79	88	90	94	97	104	108	120	128
1	5	9	22	23	25	36	39	42	44	56	57	67	71	79	88	90	94	97	104	113	120	128
1	5	9	22	23	25	36	39	42	44	56	57	67	71	79	88	90	94	97	104	108	120	128
1	5	9	22	23	26	36	39	42	53	56	57	67	71	79	88	90	94	97	104	113	120	128
1	5	9	22	23	26	36	39	42	53	56	57	67	71	79	88	90	94	97	104	108	120	128
1	5	9	22	23	26	36	39	42	50	56	57	67	71	79	88	90	94	97	104	113	120	128
1	5	9	22	23	26	36	39	42	50	56	57	67	71	79	88	90	94	97	104	108	120	128
1	5	9	22	23	26	36	39	42	44	56	57	67	71	79	88	90	94	97	104	113	120	128
1	5	9	22	23	26	36	39	42	44	56	57	67	71	79	88	90	94	97	104	108	120	128
1	6	12	21	23	25	36	39	42	53	56	57	67	71	79	88	90	94	97	104	113	120	128
1	6	12	21	23	25	36	39	42	53	56	57	67	71	79	88	90	94	97	104	108	120	128
1	6	12	21	23	25	36	39	42	50	56	57	67	71	79	88	90	94	97	104	113	120	128
1	6	12	21	23	25	36	39	42	50	56	57	67	71	79	88	90	94	97	104	108	120	128
1	6	12	21	23	25	36	39	42	44	56	57	67	71	79	88	90	94	97	104	113	120	128
1	6	12	21	23	25	36	39	42	44	56	57	67	71	79	88	90	94	97	104	108	120	128
1	6	12	21	23	26	36	39	42	53	56	57	67	71	79	88	90	94	97	104	113	120	128
1	6	12	21	23	26	36	39	42	53	56	57	67	71	79	88	90	94	97	104	108	120	128
1	6	12	21	23	26	36	39	42	50	56	57	67	71	79	88	90	94	97	104	113	120	128
1	6	12	21	23	26	36	39	42	50	56	57	67	71	79	88	90	94	97	104	108	120	128
1	6	12	21	23	26	36	39	42	44	56	57	67	71	79	88	90	94	97	104	113	120	128
1	6	12	21	23	26	36	39	42	44	56	57	67	71	79	88	90	94	97	104	108	120	128
1	6	12	22	23	25	36	39	42	53	56	57	67	71	79	88	90	94	97	104	113	120	128
1	6	12	22	23	25	36	39	42	53	56	57	67	71	79	88	90	94	97	104	108	120	128
1	6	12	22	23	25	36	39	42	50	56	57	67	71	79	88	90	94	97	104	113	120	128
1	6	12	22	23	25	36	39	42	50	56	57	67	71	79	88	90	94	97	104	108	120	128
1	6	12	22	23	25	36	39	42	44	56	57	67	71	79	88	90	94	97	104	113	120	128
1	6	12	22	23	25	36	39	42	44	56	57	67	71	79	88	90	94	97	104	108	120	128
1	6	12	22	23	26	36	39	42	53	56	57	67	71	79	88	90	94	97	104	113	120	128
1	6	12	22	23	26	36	39	42	53	56	57	67	71	79	88	90	94	97	104	108	120	128
1	6	12	22	23	26	36	39	42	50	56	57	67	71	79	88	90	94	97	104	113	120	128
1	6	12	22	23	26	36	39	42	50	56	57	67	71	79	88	90	94	97	104	108	120	128
1	6	12	22	23	26	36	39	42	44	56	57	67	71	79	88	90	94	97	104	113	120	128
1	6	12	22	23	26	36	39	42	44	56	57	67	71	79	88	90	94	97	104	108	120	128
1	6	9	21	23	25	36	39	42	53	56	57	67	71	79	88	90	94	97	104	113	120	128
1	6	9	21	23	25	36	39	42	53	56	57	67	71	79	88	90	94	97	104	108	120	128
1	6	9	21	23	25	36	39	42	50	56	57	67	71	79	88	90	94	97	104	113	120	128
1	6	9	21	23	25	36	39	42	50	56	57	67	71	79	88	90	94	97	104	108	120	128
1	6	9	21	23	25	36	39	42	44	56	57	67	71	79	88	90	94	97	104	113	120	128
1	6	9	21	23	25	36	39	42	44	56	57	67	71	79	88	90	94	97	104	108	120	128
1	6	9	21	23	26	36	39	42	53	56	57	67	71	79	88	90	94	97	104	113	120	128
1	6	9	21	23	26	36	39	42	53	56	57	67	71	79	88	90	94	97	104	108	120	128
1	6	9	21	23	26	36	39	42	50	56	57	67	71	79	88	90	94	97	104	113	120	128
1	6	9	21	23	26	36	39	42	50	56	57	67	71	79	88	90	94	97	104	108	120	128
1	6	9	21	23	26	36	39	42	44	56	57	67	71	79	88	90	94	97	104	113	120	128
1	6	9	21	23	26	36	39	42	44	56	57	67	71	79	88	90	94	97	104	108	120	128
1	6	9	22	23	25	36	39	42	53	56	57	67	71	79	88	90	94	97	104	113	120	128
1	6	9	22	23	25	36	39	42	53	56	57	67	71	79	88	90	94	97	104	108	120	128
1	6	9	22	23	25	36	39	42	50	56	57	67	71	79	88	90	94	97	104	113	120	128
1	6	9	22	23	25	36	39	42	50	56	57	67	71	79	88	90	94	97	104	108	120	128
1	6	9	22	23	25	36	39	42	44	56	57	67	71	79	88	90	94	97	104	113	120	128
1	6	9	22	23	25	36	39	42	44	56	57	67	71	79	88	90	94	97	104	108	120	128
1	6	9	22	23	26	36	39	42	53	56	57	67	71	79	88	90	94	97	104	113	120	128
1	6	9	22	23	26	36	39	42	53	56	57	67	71	79	88	90	94	97	104	108	120	128
1	6	9	22	23	26	36	39	42	50	56	57	67	71	79	88	90	94	97	104	113	120	128
1	6	9	22	23	26	36	39	42	50	56	57	67	71	79	88	90	94	97	104	108	120	128
1	6	9	22	23	26	36	39	42	44	56	57	67	71	79	88	90	94	97	104	113	120	128
1	6	9	22	23	26	36	39	42	44	56	57	67	71	79	88	90	94	97	104	108	120	128
1	3	12	21	23	25	36	38	41	53	55	58	67	71	79	88	90	94	97	104	107	119	124
1	3	12	21	23	25	36	38	41	53	55	58	67	71	79	88	90	94	97	104	107	119	122
1	3	12	21	23	25	36	38	41	53	55	58	67	71	79	88	90	94	97	104	107	118	124
1	3	12	21	23	25	36	38	41	53	55	58	67	71	79	88	90	94	97	104	107	118	122
1	3	12	21	23	25	36	38	41	53	55	58	67	71	79	88	90	94	97	104	108	119	124
1	3	12	21	23	25	36	38	41	53	55	58	67	71	79	88	90	94	97	104	108	119	122
1	3	12	21	23	25	36	38	41	53	55	58	67	71	79	88	90	94	97	104	108	118	124
1	3	12	21	23	25	36	38	41	53	55	58	67	71	79	88	90	94	97	104	108	118	122
1	3	12	21	23	25	36	38	41	47	55	58	67	71	79	88	90	94	97	104	107	119	124
1	3	12	21	23	25	36	38	41	47	55	58	67	71	79	88	90	94	97	104	107	119	122
1	3	12	21	23	25	36	38	41	47	55	58	67	71	79	88	90	94	97	104	107	118	124
1	3	12	21	23	25	36	38	41	47	55	58	67	71	79	88	90	94	97	104	107	118	122
1	3	12	21	23	25	36	38	41	47	55	58	67	71	79	88	90	94	97	104	108	119	124
1	3	12	21	23	25	36	38	41	47	55	58	67	71	79	88	90	94	97	104	108	119	122
1	3	12	21	23	25	36	38	41	47	55	58	67	71	79	88	90	94	97	104	108	118	124
1	3	12	21	23	25	36	38	41	47	55	58	67	71	79	88	90	94	97	104	108	118	122
1	3	12	21	23	25	36	38	41	43	55	58	67	71	79	88	90	94	97	104	107	119	124
1	3	12	21	23	25	36	38	41	43	55	58	67	71	79	88	90	94	97	104	107	119	122
1	3	12	21	23	25	36	38	41	43	55	58	67	71	79	88	90	94	97	104	107	118	124
1	3	12	21	23	25	36	38	41	43	55	58	67	71	79	88	90	94	97	104	107	118	122
1	3	12	21	23	25	36	38	41	43	55	58	67	71	79	88	90	94	97	104	108	119	124
1	3	12	21	23	25	36	38	41	43	55	58	67	71	79	88	90	94	97	104	108	119	122
1	3	12	21	23	25	36	38	41	43	55	58	67	71	79	88	90	94	97	104	108	118	124
1	3	12	21	23	25	36	38	41	43	55	58	67	71	79	88	90	94	97	104	108	118	122
1	3	12	21	23	25	36	38	41	44	55	58	67	71	79	88	90	94	97	104	107	119	124
1	3	12	21	23	25	36	38	41	44	55	58	67	71	79	88	90	94	97	104	107	119	122
1	3	12	21	23	25	36	38	41	44	55	58	67	71	79	88	90	94	97	104	107	118	124
1	3	12	21	23	25	36	38	41	44	55	58	67	71	79	88	90	94	97	104	107	118	122
1	3	12	21	23	25	36	38	41	44	55	58	67	71	79	88	90	94	97	104	108	119	124
1	3	12	21	23	25	36	38	41	44	55	58	67	71	79	88	90	94	97	104	108	119	122
1	3	12	21	23	25	36	38	41	44	55	58	67	71	79	88	90	94	97	104	108	118	124
1	3	12	21	23	25	36	38	41	44	55	58	67	71	79	88	90	94	97	104	108	118	122
1	3	12	21	23	26	36	38	41	53	55	58	67	71	79	88	90	94	97	104	107	119	124
1	3	12	21	23	26	36	38	41	53	55	58	67	71	79	88	90	94	97	104	107	119	122
1	3	12	21	23	26	36	38	41	53	55	58	67	71	79	88	90	94	97	104	107	118	124
1	3	12	21	23	26	36	38	41	53	55	58	67	71	79	88	90	94	97	104	107	118	122
1	3	12	21	23	26	36	38	41	53	55	58	67	71	79	88	90	94	97	104	108	119	124
1	3	12	21	23	26	36	38	41	53	55	58	67	71	79	88	90	94	97	104	108	119	122
1	3	12	21	23	26	36	38	41	53	55	58	67	71	79	88	90	94	97	104	108	118	124
1	3	12	21	23	26	36	38	41	53	55	58	67	71	79	88	90	94	97	104	108	118	122
1	3	12	21	23	26	36	38	41	47	55	58	67	71	79	88	90	94	97	104	107	119	124
1	3	12	21	23	26	36	38	41	47	55	58	67	71	79	88	90	94	97	104	107	119	122
1	3	12	21	23	26	36	38	41	47	55	58	67	71	79	88	90	94	97	104	107	118	124
1	3	12	21	23	26	36	38	41	47	55	58	67	71	79	88	90	94	97	104	107	118	122
1	3	12	21	23	26	36	38	41	47	55	58	67	71	79	88	90	94	97	104	108	119	124
1	3	12	21	23	26	36	38	41	47	55	58	67	71	79	88	90	94	97	104	108	119	122
1	3	12	21	23	26	36	38	41	47	55	58	67	71	79	88	90	94	97	104	108	118	124
1	3	12	21	23	26	36	38	41	47	55	58	67	71	79	88	90	94	97	104	108	118	122
1	3	12	21	23	26	36	38	41	43	55	58	67	71	79	88	90	94	97	104	107	119	124
1	3	12	21	23	26	36	38	41	43	55	58	67	71	79	88	90	94	97	104	107	119	122
1	3	12	21	23	26	36	38	41	43	55	58	67	71	79	88	90	94	97	104	107	118	124
1	3	12	21	23	26	36	38	41	43	55	58	67	71	79	88	90	94	97	104	107	118	122
1	3	12	21	23	26	36	38	41	43	55	58	67	71	79	88	90	94	97	104	108	119	124
1	3	12	21	23	26	36	38	41	43	55	58	67	71	79	88	90	94	97	104	108	119	122
1	3	12	21	23	26	36	38	41	43	55	58	67	71	79	88	90	94	97	104	108	118	124
1	3	12	21	23	26	36	38	41	43	55	58	67	71	79	88	90	94	97	104	108	118	122
1	3	12	21	23	26	36	38	41	44	55	58	67	71	79	88	90	94	97	104	107	119	124
1	3	12	21	23	26	36	38	41	44	55	58	67	71	79	88	90	94	97	104	107	119	122
1	3	12	21	23	26	36	38	41	44	55	58	67	71	79	88	90	94	97	104	107	118	124
1	3	12	21	23	26	36	38	41	44	55	58	67	71	79	88	90	94	97	104	107	118	122
1	3	12	21	23	26	36	38	41	44	55	58	67	71	79	88	90	94	97	104	108	119	124
1	3	12	21	23	26	36	38	41	44	55	58	67	71	79	88	90	94	97	104	108	119	122
1	3	12	21	23	26	36	38	41	44	55	58	67	71	79	88	90	94	97	104	108	118	124
1	3	12	21	23	26	36	38	41	44	55	58	67	71	79	88	90	94	97	104	108	118	122
1	3	12	22	23	25	36	38	41	53	55	58	67	71	79	88	90	94	97	104	107	119	124
1	3	12	22	23	25	36	38	41	53	55	58	67	71	79	88	90	94	97	104	107	119	122
1	3	12	22	23	25	36	38	41	53	55	58	67	71	79	88	90	94	97	104	107	118	124
1	3	12	22	23	25	36	38	41	53	55	58	67	71	79	88	90	94	97	104	107	118	122
1	3	12	22	23	25	36	38	41	53	55	58	67	71	79	88	90	94	97	104	108	119	124
1	3	12	22	23	25	36	38	41	53	55	58	67	71	79	88	90	94	97	104	108	119	122
1	3	12	22	23	25	36	38	41	53	55	58	67	71	79	88	90	94	97	104	108	118	124
1	3	12	22	23	25	36	38	41	53	55	58	67	71	79	88	90	94	97	104	108	118	122
1	3	12	22	23	25	36	38	41	47	55	58	67	71	79	88	90	94	97	104	107	119	124
1	3	12	22	23	25	36	38	41	47	55	58	67	71	79	88	90	94	97	104	107	119	122
1	3	12	22	23	25	36	38	41	47	55	58	67	71	79	88	90	94	97	104	107	118	124
1	3	12	22	23	25	36	38	41	47	55	58	67	71	79	88	90	94	97	104	107	118	122
1	3	12	22	23	25	36	38	41	47	55	58	67	71	79	88	90	94	97	104	108	119	124
1	3	12	22	23	25	36	38	41	47	55	58	67	71	79	88	90	94	97	104	108	119	122
1	3	12	22	23	25	36	38	41	47	55	58	67	71	79	88	90	94	97	104	108	118	124
1	3	12	22	23	25	36	38	41	47	55	58	67	71	79	88	90	94	97	104	108	118	122
1	3	12	22	23	25	36	38	41	43	55	58	67	71	79	88	90	94	97	104	107	119	124
1	3	12	22	23	25	36	38	41	43	55	58	67	71	79	88	90	94	97	104	107	119	122
1	3	12	22	23	25	36	38	41	43	55	58	67	71	79	88	90	94	97	104	107	118	124
1	3	12	22	23	25	36	38	41	43	55	58	67	71	79	88	90	94	97	104	107	118	122
1	3	12	22	23	25	36	38	41	43	55	58	67	71	79	88	90	94	97	104	108	119	124
1	3	12	22	23	25	36	38	41	43	55	58	67	71	79	88	90	94	97	104	108	119	122
1	3	12	22	23	25	36	38	41	43	55	58	67	71	79	88	90	94	97	104	108	118	124
1	3	12	22	23	25	36	38	41	43	55	58	67	71	79	88	90	94	97	104	108	118	122
1	3	12	22	23	25	36	38	41	44	55	58	67	71	79	88	90	94	97	104	107	119	124
1	3	12	22	23	25	36	38	41	44	55	58	67	71	79	88	90	94	97	104	107	119	122
1	3	12	22	23	25	36	38	41	44	55	58	67	71	79	88	90	94	97	104	107	118	124
1	3	12	22	23	25	36	38	41	44	55	58	67	71	79	88	90	94	97	104	107	118	122
1	3	12	22	23	25	36	38	41	44	55	58	67	71	79	88	90	94	97	104	108	119	124
1	3	12	22	23	25	36	38	41	44	55	58	67	71	79	88	90	94	97	104	108	119	122
1	3	12	22	23	25	36	38	41	44	55	58	67	71	79	88	90	94	97	104	108	118	124
1	3	12	22	23	25	36	38	41	44	55	58	67	71	79	88	90	94	97	104	108	118	122
1	3	12	22	23	26	36	38	41	53	55	58	67	71	79	88	90	94	97	104	107	119	124
1	3	12	22	23	26	36	38	41	53	55	58	67	71	79	88	90	94	97	104	107	119	122
1	3	12	22	23	26	36	38	41	53	55	58	67	71	79	88	90	94	97	104	107	118	124
1	3	12	22	23	26	36	38	41	53	55	58	67	71	79	88	90	94	97	104	107	118	122
1	3	12	22	23	26	36	38	41	53	55	58	67	71	79	88	90	94	97	104	108	119	124
1	3	12	22	23	26	36	38	41	53	55	58	67	71	79	88	90	94	97	104	108	119	122
1	3	12	22	23	26	36	38	41	53	55	58	67	71	79	88	90	94	97	104	108	118	124
1	3	12	22	23	26	36	38	41	53	55	58	67	71	79	88	90	94	97	104	108	118	122
1	3	12	22	23	26	36	38	41	47	55	58	67	71	79	88	90	94	97	104	107	119	124
1	3	12	22	23	26	36	38	41	47	55	58	67	71	79	88	90	94	97	104	107	119	122
1	3	12	22	23	26	36	38	41	47	55	58	67	71	79	88	90	94	97	104	107	118	124
1	3	12	22	23	26	36	38	41	47	55	58	67	71	79	88	90	94	97	104	107	118	122
1	3	12	22	23	26	36	38	41	47	55	58	67	71	79	88	90	94	97	104	108	119	124
1	3	12	22	23	26	36	38	41	47	55	58	67	71	79	88	90	94	97	104	108	119	122
1	3	12	22	23	26	36	38	41	47	55	58	67	71	79	88	90	94	97	104	108	118	124
1	3	12	22	23	26	36	38	41	47	55	58	67	71	79	88	90	94	97	104	108	118	122
1	3	12	22	23	26	36	38	41	43	55	58	67	71	79	88	90	94	97	104	107	119	124
1	3	12	22	23	26	36	38	41	43	55	58	67	71	79	88	90	94	97	104	107	119	122
1	3	12	22	23	26	36	38	41	43	55	58	67	71	79	88	90	94	97	104	107	118	124
1	3	12	22	23	26	36	38	41	43	55	58	67	71	79	88	90	94	97	104	107	118	122
1	3	12	22	23	26	36	38	41	43	55	58	67	71	79	88	90	94	97	104	108	119	124
1	3	12	22	23	26	36	38	41	43	55	58	67	71	79	88	90	94	97	104	108	119	122
1	3	12	22	23	26	36	38	41	43	55	58	67	71	79	88	90	94	97	104	108	118	124
1	3	12	22	23	26	36	38	41	43	55	58	67	71	79	88	90	94	97	104	108	118	122
1	3	12	22	23	26	36	38	41	44	55	58	67	71	79	88	90	94	97	104	107	119	124
1	3	12	22	23	26	36	38	41	44	55	58	67	71	79	88	90	94	97	104	107	119	122
1	3	12	22	23	26	36	38	41	44	55	58	67	71	79	88	90	94	97	104	107	118	124
1	3	12	22	23	26	36	38	41	44	55	58	67	71	79	88	90	94	97	104	107	118	122
1	3	12	22	23	26	36	38	41	44	55	58	67	71	79	88	90	94	97	104	108	119	124
1	3	12	22	23	26	36	38	41	44	55	58	67	71	79	88	90	94	97	104	108	119	122
1	3	12	22	23	26	36	38	41	44	55	58	67	71	79	88	90	94	97	104	108	118	124
1	3	12	22	23	26	36	38	41	44	55	58	67	71	79	88	90	94	97	104	108	118	122
1	3	11	21	23	25	36	38	41	53	55	58	67	71	79	88	90	94	97	104	107	119	124
1	3	11	21	23	25	36	38	41	53	55	58	67	71	79	88	90	94	97	104	107	119	122
1	3	11	21	23	25	36	38	41	53	55	58	67	71	79	88	90	94	97	104	107	118	124
1	3	11	21	23	25	36	38	41	53	55	58	67	71	79	88	90	94	97	104	107	118	122
1	3	11	21	23	25	36	38	41	53	55	58	67	71	79	88	90	94	97	104	108	119	124
1	3	11	21	23	25	36	38	41	53	55	58	67	71	79	88	90	94	97	104	108	119	122
1	3	11	21	23	25	36	38	41	53	55	58	67	71	79	88	90	94	97	104	108	118	124
1	3	11	21	23	25	36	38	41	53	55	58	67	71	79	88	90	94	97	104	108	118	122
1	3	11	21	23	25	36	38	41	47	55	58	67	71	79	88	90	94	97	104	107	119	124
1	3	11	21	23	25	36	38	41	47	55	58	67	71	79	88	90	94	97	104	107	119	122
1	3	11	21	23	25	36	38	41	47	55	58	67	71	79	88	90	94	97	104	107	118	124
1	3	11	21	23	25	36	38	41	47	55	58	67	71	79	88	90	94	97	104	107	118	122
1	3	11	21	23	25	36	38	41	47	55	58	67	71	79	88	90	94	97	104	108	119	124
1	3	11	21	23	25	36	38	41	47	55	58	67	71	79	88	90	94	97	104	108	119	122
1	3	11	21	23	25	36	38	41	47	55	58	67	71	79	88	90	94	97	104	108	118	124
1	3	11	21	23	25	36	38	41	47	55	58	67	71	79	88	90	94	97	104	108	118	122
1	3	11	21	23	25	36	38	41	43	55	58	67	71	79	88	90	94	97	104	107	119	124
1	3	11	21	23	25	36	38	41	43	55	58	67	71	79	88	90	94	97	104	107	119	122
1	3	11	21	23	25	36	38	41	43	55	58	67	71	79	88	90	94	97	104	107	118	124
1	3	11	21	23	25	36	38	41	43	55	58	67	71	79	88	90	94	97	104	107	118	122
1	3	11	21	23	25	36	38	41	43	55	58	67	71	79	88	90	94	97	104	108	119	124
1	3	11	21	23	25	36	38	41	43	55	58	67	71	79	88	90	94	97	104	108	119	122
1	3	11	21	23	25	36	38	41	43	55	58	67	71	79	88	90	94	97	104	108	118	124
1	3	11	21	23	25	36	38	41	43	55	58	67	71	79	88	90	94	97	104	108	118	122
1	3	11	21	23	25	36	38	41	44	55	58	67	71	79	88	90	94	97	104	107	119	124
1	3	11	21	23	25	36	38	41	44	55	58	67	71	79	88	90	94	97	104	107	119	122
1	3	11	21	23	25	36	38	41	44	55	58	67	71	79	88	90	94	97	104	107	118	124
1	3	11	21	23	25	36	38	41	44	55	58	67	71	79	88	90	94	97	104	107	118	122
1	3	11	21	23	25	36	38	41	44	55	58	67	71	79	88	90	94	97	104	108	119	124
1	3	11	21	23	25	36	38	41	44	55	58	67	71	79	88	90	94	97	104	108	119	122
1	3	11	21	23	25	36	38	41	44	55	58	67	71	79	88	90	94	97	104	108	118	124
1	3	11	21	23	25	36	38	41	44	55	58	67	71	79	88	90	94	97	104	108	118	122
1	3	11	21	23	26	36	38	41	53	55	58	67	71	79	88	90	94	97	104	107	119	124
1	3	11	21	23	26	36	38	41	53	55	58	67	71	79	88	90	94	97	104	107	119	122
1	3	11	21	23	26	36	38	41	53	55	58	67	71	79	88	90	94	97	104	107	118	124
1	3	11	21	23	26	36	38	41	53	55	58	67	71	79	88	90	94	97	104	107	118	122
1	3	11	21	23	26	36	38	41	53	55	58	67	71	79	88	90	94	97	104	108	119	124
1	3	11	21	23	26	36	38	41	53	55	58	67	71	79	88	90	94	97	104	108	119	122
1	3	11	21	23	26	36	38	41	53	55	58	67	71	79	88	90	94	97	104	108	118	124
1	3	11	21	23	26	36	38	41	53	55	58	67	71	79	88	90	94	97	104	108	118	122
1	3	11	21	23	26	36	38	41	47	55	58	67	71	79	88	90	94	97	104	107	119	124
1	3	11	21	23	26	36	38	41	47	55	58	67	71	79	88	90	94	97	104	107	119	122
1	3	11	21	23	26	36	38	41	47	55	58	67	71	79	88	90	94	97	104	107	118	124
1	3	11	21	23	26	36	38	41	47	55	58	67	71	79	88	90	94	97	104	107	118	122
1	3	11	21	23	26	36	38	41	47	55	58	67	71	79	88	90	94	97	104	108	119	124
1	3	11	21	23	26	36	38	41	47	55	58	67	71	79	88	90	94	97	104	108	119	122
1	3	11	21	23	26	36	38	41	47	55	58	67	71	79	88	90	94	97	104	108	118	124
1	3	11	21	23	26	36	38	41	47	55	58	67	71	79	88	90	94	97	104	108	118	122
1	3	11	21	23	26	36	38	41	43	55	58	67	71	79	88	90	94	97	104	107	119	124
1	3	11	21	23	26	36	38	41	43	55	58	67	71	79	88	90	94	97	104	107	119	122
1	3	11	21	23	26	36	38	41	43	55	58	67	71	79	88	90	94	97	104	107	118	124
1	3	11	21	23	26	36	38	41	43	55	58	67	71	79	88	90	94	97	104	107	118	122
1	3	11	21	23	26	36	38	41	43	55	58	67	71	79	88	90	94	97	104	108	119	124
1	3	11	21	23	26	36	38	41	43	55	58	67	71	79	88	90	94	97	104	108	119	122
1	3	11	21	23	26	36	38	41	43	55	58	67	71	79	88	90	94	97	104	108	118	124
1	3	11	21	23	26	36	38	41	43	55	58	67	71	79	88	90	94	97	104	108	118	122
1	3	11	21	23	26	36	38	41	44	55	58	67	71	79	88	90	94	97	104	107	119	124
1	3	11	21	23	26	36	38	41	44	55	58	67	71	79	88	90	94	97	104	107	119	122
1	3	11	21	23	26	36	38	41	44	55	58	67	71	79	88	90	94	97	104	107	118	124
1	3	11	21	23	26	36	38	41	44	55	58	67	71	79	88	90	94	97	104	107	118	122
1	3	11	21	23	26	36	38	41	44	55	58	67	71	79	88	90	94	97	104	108	119	124
1	3	11	21	23	26	36	38	41	44	55	58	67	71	79	88	90	94	97	104	108	119	122
1	3	11	21	23	26	36	38	41	44	55	58	67	71	79	88	90	94	97	104	108	118	124
1	3	11	21	23	26	36	38	41	44	55	58	67	71	79	88	90	94	97	104	108	118	122
1	3	11	22	23	25	36	38	41	53	55	58	67	71	79	88	90	94	97	104	107	119	124
1	3	11	22	23	25	36	38	41	53	55	58	67	71	79	88	90	94	97	104	107	119	122
1	3	11	22	23	25	36	38	41	53	55	58	67	71	79	88	90	94	97	104	107	118	124
1	3	11	22	23	25	36	38	41	53	55	58	67	71	79	88	90	94	97	104	107	118	122
1	3	11	22	23	25	36	38	41	53	55	58	67	71	79	88	90	94	97	104	108	119	124
1	3	11	22	23	25	36	38	41	53	55	58	67	71	79	88	90	94	97	104	108	119	122
1	3	11	22	23	25	36	38	41	53	55	58	67	71	79	88	90	94	97	104	108	118	124
1	3	11	22	23	25	36	38	41	53	55	58	67	71	79	88	90	94	97	104	108	118	122
1	3	11	22	23	25	36	38	41	47	55	58	67	71	79	88	90	94	97	104	107	119	124
1	3	11	22	23	25	36	38	41	47	55	58	67	71	79	88	90	94	97	104	107	119	122
1	3	11	22	23	25	36	38	41	47	55	58	67	71	79	88	90	94	97	104	107	118	124
1	3	11	22	23	25	36	38	41	47	55	58	67	71	79	88	90	94	97	104	107	118	122
1	3	11	22	23	25	36	38	41	47	55	58	67	71	79	88	90	94	97	104	108	119	124
1	3	11	22	23	25	36	38	41	47	55	58	67	71	79	88	90	94	97	104	108	119	122
1	3	11	22	23	25	36	38	41	47	55	58	67	71	79	88	90	94	97	104	108	118	124
1	3	11	22	23	25	36	38	41	47	55	58	67	71	79	88	90	94	97	104	108	118	122
1	3	11	22	23	25	36	38	41	43	55	58	67	71	79	88	90	94	97	104	107	119	124
1	3	11	22	23	25	36	38	41	43	55	58	67	71	79	88	90	94	97	104	107	119	122
1	3	11	22	23	25	36	38	41	43	55	58	67	71	79	88	90	94	97	104	107	118	124
1	3	11	22	23	25	36	38	41	43	55	58	67	71	79	88	90	94	97	104	107	118	122
1	3	11	22	23	25	36	38	41	43	55	58	67	71	79	88	90	94	97	104	108	119	124
1	3	11	22	23	25	36	38	41	43	55	58	67	71	79	88	90	94	97	104	108	119	122
1	3	11	22	23	25	36	38	41	43	55	58	67	71	79	88	90	94	97	104	108	118	124
1	3	11	22	23	25	36	38	41	43	55	58	67	71	79	88	90	94	97	104	108	118	122
1	3	11	22	23	25	36	38	41	44	55	58	67	71	79	88	90	94	97	104	107	119	124
1	3	11	22	23	25	36	38	41	44	55	58	67	71	79	88	90	94	97	104	107	119	122
1	3	11	22	23	25	36	38	41	44	55	58	67	71	79	88	90	94	97	104	107	118	124
1	3	11	22	23	25	36	38	41	44	55	58	67	71	79	88	90	94	97	104	107	118	122
1	3	11	22	23	25	36	38	41	44	55	58	67	71	79	88	90	94	97	104	108	119	124
1	3	11	22	23	25	36	38	41	44	55	58	67	71	79	88	90	94	97	104	108	119	122
1	3	11	22	23	25	36	38	41	44	55	58	67	71	79	88	90	94	97	104	108	118	124
1	3	11	22	23	25	36	38	41	44	55	58	67	71	79	88	90	94	97	104	108	118	122
1	3	11	22	23	26	36	38	41	53	55	58	67	71	79	88	90	94	97	104	107	119	124
1	3	11	22	23	26	36	38	41	53	55	58	67	71	79	88	90	94	97	104	107	119	122
1	3	11	22	23	26	36	38	41	53	55	58	67	71	79	88	90	94	97	104	107	118	124
1	3	11	22	23	26	36	38	41	53	55	58	67	71	79	88	90	94	97	104	107	118	122
1	3	11	22	23	26	36	38	41	53	55	58	67	71	79	88	90	94	97	104	108	119	124
1	3	11	22	23	26	36	38	41	53	55	58	67	71	79	88	90	94	97	104	108	119	122
1	3	11	22	23	26	36	38	41	53	55	58	67	71	79	88	90	94	97	104	108	118	124
1	3	11	22	23	26	36	38	41	53	55	58	67	71	79	88	90	94	97	104	108	118	122
1	3	11	22	23	26	36	38	41	47	55	58	67	71	79	88	90	94	97	104	107	119	124
1	3	11	22	23	26	36	38	41	47	55	58	67	71	79	88	90	94	97	104	107	119	122
1	3	11	22	23	26	36	38	41	47	55	58	67	71	79	88	90	94	97	104	107	118	124
1	3	11	22	23	26	36	38	41	47	55	58	67	71	79	88	90	94	97	104	107	118	122
1	3	11	22	23	26	36	38	41	47	55	58	67	71	79	88	90	94	97	104	108	119	124
1	3	11	22	23	26	36	38	41	47	55	58	67	71	79	88	90	94	97	104	108	119	122
1	3	11	22	23	26	36	38	41	47	55	58	67	71	79	88	90	94	97	104	108	118	124
1	3	11	22	23	26	36	38	41	47	55	58	67	71	79	88	90	94	97	104	108	118	122
1	3	11	22	23	26	36	38	41	43	55	58	67	71	79	88	90	94	97	104	107	119	124
1	3	11	22	23	26	36	38	41	43	55	58	67	71	79	88	90	94	97	104	107	119	122
1	3	11	22	23	26	36	38	41	43	55	58	67	71	79	88	90	94	97	104	107	118	124
1	3	11	22	23	26	36	38	41	43	55	58	67	71	79	88	90	94	97	104	107	118	122
1	3	11	22	23	26	36	38	41	43	55	58	67	71	79	88	90	94	97	104	108	119	124
1	3	11	22	23	26	36	38	41	43	55	58	67	71	79	88	90	94	97	104	108	119	122
1	3	11	22	23	26	36	38	41	43	55	58	67	71	79	88	90	94	97	104	108	118	124
1	3	11	22	23	26	36	38	41	43	55	58	67	71	79	88	90	94	97	104	108	118	122
1	3	11	22	23	26	36	38	41	44	55	58	67	71	79	88	90	94	97	104	107	119	124
1	3	11	22	23	26	36	38	41	44	55	58	67	71	79	88	90	94	97	104	107	119	122
1	3	11	22	23	26	36	38	41	44	55	58	67	71	79	88	90	94	97	104	107	118	124
1	3	11	22	23	26	36	38	41	44	55	58	67	71	79	88	90	94	97	104	107	118	122
1	3	11	22	23	26	36	38	41	44	55	58	67	71	79	88	90	94	97	104	108	119	124
1	3	11	22	23	26	36	38	41	44	55	58	67	71	79	88	90	94	97	104	108	119	122
1	3	11	22	23	26	36	38	41	44	55	58	67	71	79	88	90	94	97	104	108	118	124
1	3	11	22	23	26	36	38	41	44	55	58	67	71	79	88	90	94	97	104	108	118	122
1	5	12	21	23	25	36	38	41	53	55	58	67	71	79	88	90	94	97	104	107	119	124
1	5	12	21	23	25	36	38	41	53	55	58	67	71	79	88	90	94	97	104	107	119	122
1	5	12	21	23	25	36	38	41	53	55	58	67	71	79	88	90	94	97	104	107	118	124
1	5	12	21	23	25	36	38	41	53	55	58	67	71	79	88	90	94	97	104	107	118	122
1	5	12	21	23	25	36	38	41	53	55	58	67	71	79	88	90	94	97	104	108	119	124
1	5	12	21	23	25	36	38	41	53	55	58	67	71	79	88	90	94	97	104	108	119	122
1	5	12	21	23	25	36	38	41	53	55	58	67	71	79	88	90	94	97	104	108	118	124
1	5	12	21	23	25	36	38	41	53	55	58	67	71	79	88	90	94	97	104	108	118	122
1	5	12	21	23	25	36	38	41	47	55	58	67	71	79	88	90	94	97	104	107	119	124
1	5	12	21	23	25	36	38	41	47	55	58	67	71	79	88	90	94	97	104	107	119	122
1	5	12	21	23	25	36	38	41	47	55	58	67	71	79	88	90	94	97	104	107	118	124
1	5	12	21	23	25	36	38	41	47	55	58	67	71	79	88	90	94	97	104	107	118	122
1	5	12	21	23	25	36	38	41	47	55	58	67	71	79	88	90	94	97	104	108	119	124
1	5	12	21	23	25	36	38	41	47	55	58	67	71	79	88	90	94	97	104	108	119	122
1	5	12	21	23	25	36	38	41	47	55	58	67	71	79	88	90	94	97	104	108	118	124
1	5	12	21	23	25	36	38	41	47	55	58	67	71	79	88	90	94	97	104	108	118	122
1	5	12	21	23	25	36	38	41	43	55	58	67	71	79	88	90	94	97	104	107	119	124
1	5	12	21	23	25	36	38	41	43	55	58	67	71	79	88	90	94	97	104	107	119	122
1	5	12	21	23	25	36	38	41	43	55	58	67	71	79	88	90	94	97	104	107	118	124
1	5	12	21	23	25	36	38	41	43	55	58	67	71	79	88	90	94	97	104	107	118	122
1	5	12	21	23	25	36	38	41	43	55	58	67	71	79	88	90	94	97	104	108	119	124
1	5	12	21	23	25	36	38	41	43	55	58	67	71	79	88	90	94	97	104	108	119	122
1	5	12	21	23	25	36	38	41	43	55	58	67	71	79	88	90	94	97	104	108	118	124
1	5	12	21	23	25	36	38	41	43	55	58	67	71	79	88	90	94	97	104	108	118	122
1	5	12	21	23	25	36	38	41	44	55	58	67	71	79	88	90	94	97	104	107	119	124
1	5	12	21	23	25	36	38	41	44	55	58	67	71	79	88	90	94	97	104	107	119	122
1	5	12	21	23	25	36	38	41	44	55	58	67	71	79	88	90	94	97	104	107	118	124
1	5	12	21	23	25	36	38	41	44	55	58	67	71	79	88	90	94	97	104	107	118	122
1	5	12	21	23	25	36	38	41	44	55	58	67	71	79	88	90	94	97	104	108	119	124
1	5	12	21	23	25	36	38	41	44	55	58	67	71	79	88	90	94	97	104	108	119	122
1	5	12	21	23	25	36	38	41	44	55	58	67	71	79	88	90	94	97	104	108	118	124
1	5	12	21	23	25	36	38	41	44	55	58	67	71	79	88	90	94	97	104	108	118	122
1	5	12	21	23	26	36	38	41	53	55	58	67	71	79	88	90	94	97	104	107	119	124
1	5	12	21	23	26	36	38	41	53	55	58	67	71	79	88	90	94	97	104	107	119	122
1	5	12	21	23	26	36	38	41	53	55	58	67	71	79	88	90	94	97	104	107	118	124
1	5	12	21	23	26	36	38	41	53	55	58	67	71	79	88	90	94	97	104	107	118	122
1	5	12	21	23	26	36	38	41	53	55	58	67	71	79	88	90	94	97	104	108	119	124
1	5	12	21	23	26	36	38	41	53	55	58	67	71	79	88	90	94	97	104	108	119	122
1	5	12	21	23	26	36	38	41	53	55	58	67	71	79	88	90	94	97	104	108	118	124
1	5	12	21	23	26	36	38	41	53	55	58	67	71	79	88	90	94	97	104	108	118	122
1	5	12	21	23	26	36	38	41	47	55	58	67	71	79	88	90	94	97	104	107	119	124
1	5	12	21	23	26	36	38	41	47	55	58	67	71	79	88	90	94	97	104	107	119	122
1	5	12	21	23	26	36	38	41	47	55	58	67	71	79	88	90	94	97	104	107	118	124
1	5	12	21	23	26	36	38	41	47	55	58	67	71	79	88	90	94	97	104	107	118	122
1	5	12	21	23	26	36	38	41	47	55	58	67	71	79	88	90	94	97	104	108	119	124
1	5	12	21	23	26	36	38	41	47	55	58	67	71	79	88	90	94	97	104	108	119	122
1	5	12	21	23	26	36	38	41	47	55	58	67	71	79	88	90	94	97	104	108	118	124
1	5	12	21	23	26	36	38	41	47	55	58	67	71	79	88	90	94	97	104	108	118	122
1	5	12	21	23	26	36	38	41	43	55	58	67	71	79	88	90	94	97	104	107	119	124
1	5	12	21	23	26	36	38	41	43	55	58	67	71	79	88	90	94	97	104	107	119	122
1	5	12	21	23	26	36	38	41	43	55	58	67	71	79	88	90	94	97	104	107	118	124
1	5	12	21	23	26	36	38	41	43	55	58	67	71	79	88	90	94	97	104	107	118	122
1	5	12	21	23	26	36	38	41	43	55	58	67	71	79	88	90	94	97	104	108	119	124
1	5	12	21	23	26	36	38	41	43	55	58	67	71	79	88	90	94	97	104	108	119	122
1	5	12	21	23	26	36	38	41	43	55	58	67	71	79	88	90	94	97	104	108	118	124
1	5	12	21	23	26	36	38	41	43	55	58	67	71	79	88	90	94	97	104	108	118	122
1	5	12	21	23	26	36	38	41	44	55	58	67	71	79	88	90	94	97	104	107	119	124
1	5	12	21	23	26	36	38	41	44	55	58	67	71	79	88	90	94	97	104	107	119	122
1	5	12	21	23	26	36	38	41	44	55	58	67	71	79	88	90	94	97	104	107	118	124
1	5	12	21	23	26	36	38	41	44	55	58	67	71	79	88	90	94	97	104	107	118	122
1	5	12	21	23	26	36	38	41	44	55	58	67	71	79	88	90	94	97	104	108	119	124
1	5	12	21	23	26	36	38	41	44	55	58	67	71	79	88	90	94	97	104	108	119	122
1	5	12	21	23	26	36	38	41	44	55	58	67	71	79	88	90	94	97	104	108	118	124
1	5	12	21	23	26	36	38	41	44	55	58	67	71	79	88	90	94	97	104	108	118	122
1	5	12	22	23	25	36	38	41	53	55	58	67	71	79	88	90	94	97	104	107	119	124
1	5	12	22	23	25	36	38	41	53	55	58	67	71	79	88	90	94	97	104	107	119	122
1	5	12	22	23	25	36	38	41	53	55	58	67	71	79	88	90	94	97	104	107	118	124
1	5	12	22	23	25	36	38	41	53	55	58	67	71	79	88	90	94	97	104	107	118	122
1	5	12	22	23	25	36	38	41	53	55	58	67	71	79	88	90	94	97	104	108	119	124
1	5	12	22	23	25	36	38	41	53	55	58	67	71	79	88	90	94	97	104	108	119	122
1	5	12	22	23	25	36	38	41	53	55	58	67	71	79	88	90	94	97	104	108	118	124
1	5	12	22	23	25	36	38	41	53	55	58	67	71	79	88	90	94	97	104	108	118	122
1	5	12	22	23	25	36	38	41	47	55	58	67	71	79	88	90	94	97	104	107	119	124
1	5	12	22	23	25	36	38	41	47	55	58	67	71	79	88	90	94	97	104	107	119	122
1	5	12	22	23	25	36	38	41	47	55	58	67	71	79	88	90	94	97	104	107	118	124
1	5	12	22	23	25	36	38	41	47	55	58	67	71	79	88	90	94	97	104	107	118	122
1	5	12	22	23	25	36	38	41	47	55	58	67	71	79	88	90	94	97	104	108	119	124
1	5	12	22	23	25	36	38	41	47	55	58	67	71	79	88	90	94	97	104	108	119	122
1	5	12	22	23	25	36	38	41	47	55	58	67	71	79	88	90	94	97	104	108	118	124
1	5	12	22	23	25	36	38	41	47	55	58	67	71	79	88	90	94	97	104	108	118	122
1	5	12	22	23	25	36	38	41	43	55	58	67	71	79	88	90	94	97	104	107	119	124
1	5	12	22	23	25	36	38	41	43	55	58	67	71	79	88	90	94	97	104	107	119	122
1	5	12	22	23	25	36	38	41	43	55	58	67	71	79	88	90	94	97	104	107	118	124
1	5	12	22	23	25	36	38	41	43	55	58	67	71	79	88	90	94	97	104	107	118	122
1	5	12	22	23	25	36	38	41	43	55	58	67	71	79	88	90	94	97	104	108	119	124
1	5	12	22	23	25	36	38	41	43	55	58	67	71	79	88	90	94	97	104	108	119	122
1	5	12	22	23	25	36	38	41	43	55	58	67	71	79	88	90	94	97	104	108	118	124
1	5	12	22	23	25	36	38	41	43	55	58	67	71	79	88	90	94	97	104	108	118	122
1	5	12	22	23	25	36	38	41	44	55	58	67	71	79	88	90	94	97	104	107	119	124
1	5	12	22	23	25	36	38	41	44	55	58	67	71	79	88	90	94	97	104	107	119	122
1	5	12	22	23	25	36	38	41	44	55	58	67	71	79	88	90	94	97	104	107	118	124
1	5	12	22	23	25	36	38	41	44	55	58	67	71	79	88	90	94	97	104	107	118	122
1	5	12	22	23	25	36	38	41	44	55	58	67	71	79	88	90	94	97	104	108	119	124
1	5	12	22	23	25	36	38	41	44	55	58	67	71	79	88	90	94	97	104	108	119	122
1	5	12	22	23	25	36	38	41	44	55	58	67	71	79	88	90	94	97	104	108	118	124
1	5	12	22	23	25	36	38	41	44	55	58	67	71	79	88	90	94	97	104	108	118	122
1	5	12	22	23	26	36	38	41	53	55	58	67	71	79	88	90	94	97	104	107	119	124
1	5	12	22	23	26	36	38	41	53	55	58	67	71	79	88	90	94	97	104	107	119	122
1	5	12	22	23	26	36	38	41	53	55	58	67	71	79	88	90	94	97	104	107	118	124
1	5	12	22	23	26	36	38	41	53	55	58	67	71	79	88	90	94	97	104	107	118	122
1	5	12	22	23	26	36	38	41	53	55	58	67	71	79	88	90	94	97	104	108	119	124
1	5	12	22	23	26	36	38	41	53	55	58	67	71	79	88	90	94	97	104	108	119	122
1	5	12	22	23	26	36	38	41	53	55	58	67	71	79	88	90	94	97	104	108	118	124
1	5	12	22	23	26	36	38	41	53	55	58	67	71	79	88	90	94	97	104	108	118	122
1	5	12	22	23	26	36	38	41	47	55	58	67	71	79	88	90	94	97	104	107	119	124
1	5	12	22	23	26	36	38	41	47	55	58	67	71	79	88	90	94	97	104	107	119	122
1	5	12	22	23	26	36	38	41	47	55	58	67	71	79	88	90	94	97	104	107	118	124
1	5	12	22	23	26	36	38	41	47	55	58	67	71	79	88	90	94	97	104	107	118	122
1	5	12	22	23	26	36	38	41	47	55	58	67	71	79	88	90	94	97	104	108	119	124
1	5	12	22	23	26	36	38	41	47	55	58	67	71	79	88	90	94	97	104	108	119	122
1	5	12	22	23	26	36	38	41	47	55	58	67	71	79	88	90	94	97	104	108	118	124
1	5	12	22	23	26	36	38	41	47	55	58	67	71	79	88	90	94	97	104	108	118	122
1	5	12	22	23	26	36	38	41	43	55	58	67	71	79	88	90	94	97	104	107	119	124
1	5	12	22	23	26	36	38	41	43	55	58	67	71	79	88	90	94	97	104	107	119	122
1	5	12	22	23	26	36	38	41	43	55	58	67	71	79	88	90	94	97	104	107	118	124
1	5	12	22	23	26	36	38	41	43	55	58	67	71	79	88	90	94	97	104	107	118	122
1	5	12	22	23	26	36	38	41	43	55	58	67	71	79	88	90	94	97	104	108	119	124
1	5	12	22	23	26	36	38	41	43	55	58	67	71	79	88	90	94	97	104	108	119	122
1	5	12	22	23	26	36	38	41	43	55	58	67	71	79	88	90	94	97	104	108	118	124
1	5	12	22	23	26	36	38	41	43	55	58	67	71	79	88	90	94	97	104	108	118	122
1	5	12	22	23	26	36	38	41	44	55	58	67	71	79	88	90	94	97	104	107	119	124
1	5	12	22	23	26	36	38	41	44	55	58	67	71	79	88	90	94	97	104	107	119	122
1	5	12	22	23	26	36	38	41	44	55	58	67	71	79	88	90	94	97	104	107	118	124
1	5	12	22	23	26	36	38	41	44	55	58	67	71	79	88	90	94	97	104	107	118	122
1	5	12	22	23	26	36	38	41	44	55	58	67	71	79	88	90	94	97	104	108	119	124
1	5	12	22	23	26	36	38	41	44	55	58	67	71	79	88	90	94	97	104	108	119	122
1	5	12	22	23	26	36	38	41	44	55	58	67	71	79	88	90	94	97	104	108	118	124
1	5	12	22	23	26	36	38	41	44	55	58	67	71	79	88	90	94	97	104	108	118	122
1	5	11	21	23	25	36	38	41	53	55	58	67	71	79	88	90	94	97	104	107	119	124
1	5	11	21	23	25	36	38	41	53	55	58	67	71	79	88	90	94	97	104	107	119	122
1	5	11	21	23	25	36	38	41	53	55	58	67	71	79	88	90	94	97	104	107	118	124
1	5	11	21	23	25	36	38	41	53	55	58	67	71	79	88	90	94	97	104	107	118	122
1	5	11	21	23	25	36	38	41	53	55	58	67	71	79	88	90	94	97	104	108	119	124
1	5	11	21	23	25	36	38	41	53	55	58	67	71	79	88	90	94	97	104	108	119	122
1	5	11	21	23	25	36	38	41	53	55	58	67	71	79	88	90	94	97	104	108	118	124
1	5	11	21	23	25	36	38	41	53	55	58	67	71	79	88	90	94	97	104	108	118	122
1	5	11	21	23	25	36	38	41	47	55	58	67	71	79	88	90	94	97	104	107	119	124
1	5	11	21	23	25	36	38	41	47	55	58	67	71	79	88	90	94	97	104	107	119	122
1	5	11	21	23	25	36	38	41	47	55	58	67	71	79	88	90	94	97	104	107	118	124
1	5	11	21	23	25	36	38	41	47	55	58	67	71	79	88	90	94	97	104	107	118	122
1	5	11	21	23	25	36	38	41	47	55	58	67	71	79	88	90	94	97	104	108	119	124
1	5	11	21	23	25	36	38	41	47	55	58	67	71	79	88	90	94	97	104	108	119	122
1	5	11	21	23	25	36	38	41	47	55	58	67	71	79	88	90	94	97	104	108	118	124
1	5	11	21	23	25	36	38	41	47	55	58	67	71	79	88	90	94	97	104	108	118	122
1	5	11	21	23	25	36	38	41	43	55	58	67	71	79	88	90	94	97	104	107	119	124
1	5	11	21	23	25	36	38	41	43	55	58	67	71	79	88	90	94	97	104	107	119	122
1	5	11	21	23	25	36	38	41	43	55	58	67	71	79	88	90	94	97	104	107	118	124
1	5	11	21	23	25	36	38	41	43	55	58	67	71	79	88	90	94	97	104	107	118	122
1	5	11	21	23	25	36	38	41	43	55	58	67	71	79	88	90	94	97	104	108	119	124
1	5	11	21	23	25	36	38	41	43	55	58	67	71	79	88	90	94	97	104	108	119	122
1	5	11	21	23	25	36	38	41	43	55	58	67	71	79	88	90	94	97	104	108	118	124
1	5	11	21	23	25	36	38	41	43	55	58	67	71	79	88	90	94	97	104	108	118	122
1	5	11	21	23	25	36	38	41	44	55	58	67	71	79	88	90	94	97	104	107	119	124
1	5	11	21	23	25	36	38	41	44	55	58	67	71	79	88	90	94	97	104	107	119	122
1	5	11	21	23	25	36	38	41	44	55	58	67	71	79	88	90	94	97	104	107	118	124
1	5	11	21	23	25	36	38	41	44	55	58	67	71	79	88	90	94	97	104	107	118	122
1	5	11	21	23	25	36	38	41	44	55	58	67	71	79	88	90	94	97	104	108	119	124
1	5	11	21	23	25	36	38	41	44	55	58	67	71	79	88	90	94	97	104	108	119	122
1	5	11	21	23	25	36	38	41	44	55	58	67	71	79	88	90	94	97	104	108	118	124
1	5	11	21	23	25	36	38	41	44	55	58	67	71	79	88	90	94	97	104	108	118	122
1	5	11	21	23	26	36	38	41	53	55	58	67	71	79	88	90	94	97	104	107	119	124
1	5	11	21	23	26	36	38	41	53	55	58	67	71	79	88	90	94	97	104	107	119	122
1	5	11	21	23	26	36	38	41	53	55	58	67	71	79	88	90	94	97	104	107	118	124
1	5	11	21	23	26	36	38	41	53	55	58	67	71	79	88	90	94	97	104	107	118	122
1	5	11	21	23	26	36	38	41	53	55	58	67	71	79	88	90	94	97	104	108	119	124
1	5	11	21	23	26	36	38	41	53	55	58	67	71	79	88	90	94	97	104	108	119	122
1	5	11	21	23	26	36	38	41	53	55	58	67	71	79	88	90	94	97	104	108	118	124
1	5	11	21	23	26	36	38	41	53	55	58	67	71	79	88	90	94	97	104	108	118	122
1	5	11	21	23	26	36	38	41	47	55	58	67	71	79	88	90	94	97	104	107	119	124
1	5	11	21	23	26	36	38	41	47	55	58	67	71	79	88	90	94	97	104	107	119	122
1	5	11	21	23	26	36	38	41	47	55	58	67	71	79	88	90	94	97	104	107	118	124
1	5	11	21	23	26	36	38	41	47	55	58	67	71	79	88	90	94	97	104	107	118	122
1	5	11	21	23	26	36	38	41	47	55	58	67	71	79	88	90	94	97	104	108	119	124
1	5	11	21	23	26	36	38	41	47	55	58	67	71	79	88	90	94	97	104	108	119	122
1	5	11	21	23	26	36	38	41	47	55	58	67	71	79	88	90	94	97	104	108	118	124
1	5	11	21	23	26	36	38	41	47	55	58	67	71	79	88	90	94	97	104	108	118	122
1	5	11	21	23	26	36	38	41	43	55	58	67	71	79	88	90	94	97	104	107	119	124
1	5	11	21	23	26	36	38	41	43	55	58	67	71	79	88	90	94	97	104	107	119	122
1	5	11	21	23	26	36	38	41	43	55	58	67	71	79	88	90	94	97	104	107	118	124
1	5	11	21	23	26	36	38	41	43	55	58	67	71	79	88	90	94	97	104	107	118	122
1	5	11	21	23	26	36	38	41	43	55	58	67	71	79	88	90	94	97	104	108	119	124
1	5	11	21	23	26	36	38	41	43	55	58	67	71	79	88	90	94	97	104	108	119	122
1	5	11	21	23	26	36	38	41	43	55	58	67	71	79	88	90	94	97	104	108	118	124
1	5	11	21	23	26	36	38	41	43	55	58	67	71	79	88	90	94	97	104	108	118	122
1	5	11	21	23	26	36	38	41	44	55	58	67	71	79	88	90	94	97	104	107	119	124
1	5	11	21	23	26	36	38	41	44	55	58	67	71	79	88	90	94	97	104	107	119	122
1	5	11	21	23	26	36	38	41	44	55	58	67	71	79	88	90	94	97	104	107	118	124
1	5	11	21	23	26	36	38	41	44	55	58	67	71	79	88	90	94	97	104	107	118	122
1	5	11	21	23	26	36	38	41	44	55	58	67	71	79	88	90	94	97	104	108	119	124
1	5	11	21	23	26	36	38	41	44	55	58	67	71	79	88	90	94	97	104	108	119	122
1	5	11	21	23	26	36	38	41	44	55	58	67	71	79	88	90	94	97	104	108	118	124
1	5	11	21	23	26	36	38	41	44	55	58	67	71	79	88	90	94	97	104	108	118	122
1	5	11	22	23	25	36	38	41	53	55	58	67	71	79	88	90	94	97	104	107	119	124
1	5	11	22	23	25	36	38	41	53	55	58	67	71	79	88	90	94	97	104	107	119	122
1	5	11	22	23	25	36	38	41	53	55	58	67	71	79	88	90	94	97	104	107	118	124
1	5	11	22	23	25	36	38	41	53	55	58	67	71	79	88	90	94	97	104	107	118	122
1	5	11	22	23	25	36	38	41	53	55	58	67	71	79	88	90	94	97	104	108	119	124
1	5	11	22	23	25	36	38	41	53	55	58	67	71	79	88	90	94	97	104	108	119	122
1	5	11	22	23	25	36	38	41	53	55	58	67	71	79	88	90	94	97	104	108	118	124
1	5	11	22	23	25	36	38	41	53	55	58	67	71	79	88	90	94	97	104	108	118	122
1	5	11	22	23	25	36	38	41	47	55	58	67	71	79	88	90	94	97	104	107	119	124
1	5	11	22	23	25	36	38	41	47	55	58	67	71	79	88	90	94	97	104	107	119	122
1	5	11	22	23	25	36	38	41	47	55	58	67	71	79	88	90	94	97	104	107	118	124
1	5	11	22	23	25	36	38	41	47	55	58	67	71	79	88	90	94	97	104	107	118	122
1	5	11	22	23	25	36	38	41	47	55	58	67	71	79	88	90	94	97	104	108	119	124
1	5	11	22	23	25	36	38	41	47	55	58	67	71	79	88	90	94	97	104	108	119	122
1	5	11	22	23	25	36	38	41	47	55	58	67	71	79	88	90	94	97	104	108	118	124
1	5	11	22	23	25	36	38	41	47	55	58	67	71	79	88	90	94	97	104	108	118	122
1	5	11	22	23	25	36	38	41	43	55	58	67	71	79	88	90	94	97	104	107	119	124
1	5	11	22	23	25	36	38	41	43	55	58	67	71	79	88	90	94	97	104	107	119	122
1	5	11	22	23	25	36	38	41	43	55	58	67	71	79	88	90	94	97	104	107	118	124
1	5	11	22	23	25	36	38	41	43	55	58	67	71	79	88	90	94	97	104	107	118	122
1	5	11	22	23	25	36	38	41	43	55	58	67	71	79	88	90	94	97	104	108	119	124
1	5	11	22	23	25	36	38	41	43	55	58	67	71	79	88	90	94	97	104	108	119	122
1	5	11	22	23	25	36	38	41	43	55	58	67	71	79	88	90	94	97	104	108	118	124
1	5	11	22	23	25	36	38	41	43	55	58	67	71	79	88	90	94	97	104	108	118	122
1	5	11	22	23	25	36	38	41	44	55	58	67	71	79	88	90	94	97	104	107	119	124
1	5	11	22	23	25	36	38	41	44	55	58	67	71	79	88	90	94	97	104	107	119	122
1	5	11	22	23	25	36	38	41	44	55	58	67	71	79	88	90	94	97	104	107	118	124
1	5	11	22	23	25	36	38	41	44	55	58	67	71	79	88	90	94	97	104	107	118	122
1	5	11	22	23	25	36	38	41	44	55	58	67	71	79	88	90	94	97	104	108	119	124
1	5	11	22	23	25	36	38	41	44	55	58	67	71	79	88	90	94	97	104	108	119	122
1	5	11	22	23	25	36	38	41	44	55	58	67	71	79	88	90	94	97	104	108	118	124
1	5	11	22	23	25	36	38	41	44	55	58	67	71	79	88	90	94	97	104	108	118	122
1	5	11	22	23	26	36	38	41	53	55	58	67	71	79	88	90	94	97	104	107	119	124
1	5	11	22	23	26	36	38	41	53	55	58	67	71	79	88	90	94	97	104	107	119	122
1	5	11	22	23	26	36	38	41	53	55	58	67	71	79	88	90	94	97	104	107	118	124
1	5	11	22	23	26	36	38	41	53	55	58	67	71	79	88	90	94	97	104	107	118	122
1	5	11	22	23	26	36	38	41	53	55	58	67	71	79	88	90	94	97	104	108	119	124
1	5	11	22	23	26	36	38	41	53	55	58	67	71	79	88	90	94	97	104	108	119	122
1	5	11	22	23	26	36	38	41	53	55	58	67	71	79	88	90	94	97	104	108	118	124
1	5	11	22	23	26	36	38	41	53	55	58	67	71	79	88	90	94	97	104	108	118	122
1	5	11	22	23	26	36	38	41	47	55	58	67	71	79	88	90	94	97	104	107	119	124
1	5	11	22	23	26	36	38	41	47	55	58	67	71	79	88	90	94	97	104	107	119	122
1	5	11	22	23	26	36	38	41	47	55	58	67	71	79	88	90	94	97	104	107	118	124
1	5	11	22	23	26	36	38	41	47	55	58	67	71	79	88	90	94	97	104	107	118	122
1	5	11	22	23	26	36	38	41	47	55	58	67	71	79	88	90	94	97	104	108	119	124
1	5	11	22	23	26	36	38	41	47	55	58	67	71	79	88	90	94	97	104	108	119	122
1	5	11	22	23	26	36	38	41	47	55	58	67	71	79	88	90	94	97	104	108	118	124
1	5	11	22	23	26	36	38	41	47	55	58	67	71	79	88	90	94	97	104	108	118	122
1	5	11	22	23	26	36	38	41	43	55	58	67	71	79	88	90	94	97	104	107	119	124
1	5	11	22	23	26	36	38	41	43	55	58	67	71	79	88	90	94	97	104	107	119	122
1	5	11	22	23	26	36	38	41	43	55	58	67	71	79	88	90	94	97	104	107	118	124
1	5	11	22	23	26	36	38	41	43	55	58	67	71	79	88	90	94	97	104	107	118	122
1	5	11	22	23	26	36	38	41	43	55	58	67	71	79	88	90	94	97	104	108	119	124
1	5	11	22	23	26	36	38	41	43	55	58	67	71	79	88	90	94	97	104	108	119	122
1	5	11	22	23	26	36	38	41	43	55	58	67	71	79	88	90	94	97	104	108	118	124
1	5	11	22	23	26	36	38	41	43	55	58	67	71	79	88	90	94	97	104	108	118	122
1	5	11	22	23	26	36	38	41	44	55	58	67	71	79	88	90	94	97	104	107	119	124
1	5	11	22	23	26	36	38	41	44	55	58	67	71	79	88	90	94	97	104	107	119	122
1	5	11	22	23	26	36	38	41	44	55	58	67	71	79	88	90	94	97	104	107	118	124
1	5	11	22	23	26	36	38	41	44	55	58	67	71	79	88	90	94	97	104	107	118	122
1	5	11	22	23	26	36	38	41	44	55	58	67	71	79	88	90	94	97	104	108	119	124
1	5	11	22	23	26	36	38	41	44	55	58	67	71	79	88	90	94	97	104	108	119	122
1	5	11	22	23	26	36	38	41	44	55	58	67	71	79	88	90	94	97	104	108	118	124
1	5	11	22	23	26	36	38	41	44	55	58	67	71	79	88	90	94	97	104	108	118	122
1	5	11	22	23	25	36	38	41	53	55	62	67	69	79	88	90	94	97	104	107	121	122
1	5	11	22	23	25	36	38	41	53	55	62	67	69	79	88	90	94	97	104	107	121	125
1	5	11	22	23	25	36	38	41	53	55	62	67	69	79	88	90	94	97	104	107	119	122
1	5	11	22	23	25	36	38	41	53	55	62	67	69	79	88	90	94	97	104	107	119	125
1	5	11	22	23	25	36	38	41	53	55	62	67	69	79	88	90	94	97	104	108	121	122
1	5	11	22	23	25	36	38	41	53	55	62	67	69	79	88	90	94	97	104	108	121	125
1	5	11	22	23	25	36	38	41	53	55	62	67	69	79	88	90	94	97	104	108	119	122
1	5	11	22	23	25	36	38	41	53	55	62	67	69	79	88	90	94	97	104	108	119	125
1	5	11	22	23	25	36	38	41	50	55	62	67	69	79	88	90	94	97	104	107	121	122
1	5	11	22	23	25	36	38	41	50	55	62	67	69	79	88	90	94	97	104	107	121	125
1	5	11	22	23	25	36	38	41	50	55	62	67	69	79	88	90	94	97	104	107	119	122
1	5	11	22	23	25	36	38	41	50	55	62	67	69	79	88	90	94	97	104	107	119	125
1	5	11	22	23	25	36	38	41	50	55	62	67	69	79	88	90	94	97	104	108	121	122
1	5	11	22	23	25	36	38	41	50	55	62	67	69	79	88	90	94	97	104	108	121	125
1	5	11	22	23	25	36	38	41	50	55	62	67	69	79	88	90	94	97	104	108	119	122
1	5	11	22	23	25	36	38	41	50	55	62	67	69	79	88	90	94	97	104	108	119	125
1	5	11	22	23	25	36	38	41	44	55	62	67	69	79	88	90	94	97	104	107	121	122
1	5	11	22	23	25	36	38	41	44	55	62	67	69	79	88	90	94	97	104	107	121	125
1	5	11	22	23	25	36	38	41	44	55	62	67	69	79	88	90	94	97	104	107	119	122
1	5	11	22	23	25	36	38	41	44	55	62	67	69	79	88	90	94	97	104	107	119	125
1	5	11	22	23	25	36	38	41	44	55	62	67	69	79	88	90	94	97	104	108	121	122
1	5	11	22	23	25	36	38	41	44	55	62	67	69	79	88	90	94	97	104	108	121	125
1	5	11	22	23	25	36	38	41	44	55	62	67	69	79	88	90	94	97	104	108	119	122
1	5	11	22	23	25	36	38	41	44	55	62	67	69	79	88	90	94	97	104	108	119	125
1	5	11	22	23	26	36	38	41	53	55	62	67	69	79	88	90	94	97	104	107	121	122
1	5	11	22	23	26	36	38	41	53	55	62	67	69	79	88	90	94	97	104	107	121	125
1	5	11	22	23	26	36	38	41	53	55	62	67	69	79	88	90	94	97	104	107	119	122
1	5	11	22	23	26	36	38	41	53	55	62	67	69	79	88	90	94	97	104	107	119	125
1	5	11	22	23	26	36	38	41	53	55	62	67	69	79	88	90	94	97	104	108	121	122
1	5	11	22	23	26	36	38	41	53	55	62	67	69	79	88	90	94	97	104	108	121	125
1	5	11	22	23	26	36	38	41	53	55	62	67	69	79	88	90	94	97	104	108	119	122
1	5	11	22	23	26	36	38	41	53	55	62	67	69	79	88	90	94	97	104	108	119	125
1	5	11	22	23	26	36	38	41	50	55	62	67	69	79	88	90	94	97	104	107	121	122
1	5	11	22	23	26	36	38	41	50	55	62	67	69	79	88	90	94	97	104	107	121	125
1	5	11	22	23	26	36	38	41	50	55	62	67	69	79	88	90	94	97	104	107	119	122
1	5	11	22	23	26	36	38	41	50	55	62	67	69	79	88	90	94	97	104	107	119	125
1	5	11	22	23	26	36	38	41	50	55	62	67	69	79	88	90	94	97	104	108	121	122
1	5	11	22	23	26	36	38	41	50	55	62	67	69	79	88	90	94	97	104	108	121	125
1	5	11	22	23	26	36	38	41	50	55	62	67	69	79	88	90	94	97	104	108	119	122
1	5	11	22	23	26	36	38	41	50	55	62	67	69	79	88	90	94	97	104	108	119	125
1	5	11	22	23	26	36	38	41	44	55	62	67	69	79	88	90	94	97	104	107	121	122
1	5	11	22	23	26	36	38	41	44	55	62	67	69	79	88	90	94	97	104	107	121	125
1	5	11	22	23	26	36	38	41	44	55	62	67	69	79	88	90	94	97	104	107	119	122
1	5	11	22	23	26	36	38	41	44	55	62	67	69	79	88	90	94	97	104	107	119	125
1	5	11	22	23	26	36	38	41	44	55	62	67	69	79	88	90	94	97	104	108	121	122
1	5	11	22	23	26	36	38	41	44	55	62	67	69	79	88	90	94	97	104	108	121	125
1	5	11	22	23	26	36	38	41	44	55	62	67	69	79	88	90	94	97	104	108	119	122
1	5	11	22	23	26	36	38	41	44	55	62	67	69	79	88	90	94	97	104	108	119	125
1	5	11	13	23	25	36	38	41	53	55	62	67	69	79	88	90	94	97	104	107	121	122
1	5	11	13	23	25	36	38	41	53	55	62	67	69	79	88	90	94	97	104	107	121	125
1	5	11	13	23	25	36	38	41	53	55	62	67	69	79	88	90	94	97	104	107	119	122
1	5	11	13	23	25	36	38	41	53	55	62	67	69	79	88	90	94	97	104	107	119	125
1	5	11	13	23	25	36	38	41	53	55	62	67	69	79	88	90	94	97	104	108	121	122
1	5	11	13	23	25	36	38	41	53	55	62	67	69	79	88	90	94	97	104	108	121	125
1	5	11	13	23	25	36	38	41	53	55	62	67	69	79	88	90	94	97	104	108	119	122
1	5	11	13	23	25	36	38	41	53	55	62	67	69	79	88	90	94	97	104	108	119	125
1	5	11	13	23	25	36	38	41	50	55	62	67	69	79	88	90	94	97	104	107	121	122
1	5	11	13	23	25	36	38	41	50	55	62	67	69	79	88	90	94	97	104	107	121	125
1	5	11	13	23	25	36	38	41	50	55	62	67	69	79	88	90	94	97	104	107	119	122
1	5	11	13	23	25	36	38	41	50	55	62	67	69	79	88	90	94	97	104	107	119	125
1	5	11	13	23	25	36	38	41	50	55	62	67	69	79	88	90	94	97	104	108	121	122
1	5	11	13	23	25	36	38	41	50	55	62	67	69	79	88	90	94	97	104	108	121	125
1	5	11	13	23	25	36	38	41	50	55	62	67	69	79	88	90	94	97	104	108	119	122
1	5	11	13	23	25	36	38	41	50	55	62	67	69	79	88	90	94	97	104	108	119	125
1	5	11	13	23	25	36	38	41	44	55	62	67	69	79	88	90	94	97	104	107	121	122
1	5	11	13	23	25	36	38	41	44	55	62	67	69	79	88	90	94	97	104	107	121	125
1	5	11	13	23	25	36	38	41	44	55	62	67	69	79	88	90	94	97	104	107	119	122
1	5	11	13	23	25	36	38	41	44	55	62	67	69	79	88	90	94	97	104	107	119	125
1	5	11	13	23	25	36	38	41	44	55	62	67	69	79	88	90	94	97	104	108	121	122
1	5	11	13	23	25	36	38	41	44	55	62	67	69	79	88	90	94	97	104	108	121	125
1	5	11	13	23	25	36	38	41	44	55	62	67	69	79	88	90	94	97	104	108	119	122
1	5	11	13	23	25	36	38	41	44	55	62	67	69	79	88	90	94	97	104	108	119	125
1	5	11	13	23	26	36	38	41	53	55	62	67	69	79	88	90	94	97	104	107	121	122
1	5	11	13	23	26	36	38	41	53	55	62	67	69	79	88	90	94	97	104	107	121	125
1	5	11	13	23	26	36	38	41	53	55	62	67	69	79	88	90	94	97	104	107	119	122
1	5	11	13	23	26	36	38	41	53	55	62	67	69	79	88	90	94	97	104	107	119	125
1	5	11	13	23	26	36	38	41	53	55	62	67	69	79	88	90	94	97	104	108	121	122
1	5	11	13	23	26	36	38	41	53	55	62	67	69	79	88	90	94	97	104	108	121	125
1	5	11	13	23	26	36	38	41	53	55	62	67	69	79	88	90	94	97	104	108	119	122
1	5	11	13	23	26	36	38	41	53	55	62	67	69	79	88	90	94	97	104	108	119	125
1	5	11	13	23	26	36	38	41	50	55	62	67	69	79	88	90	94	97	104	107	121	122
1	5	11	13	23	26	36	38	41	50	55	62	67	69	79	88	90	94	97	104	107	121	125
1	5	11	13	23	26	36	38	41	50	55	62	67	69	79	88	90	94	97	104	107	119	122
1	5	11	13	23	26	36	38	41	50	55	62	67	69	79	88	90	94	97	104	107	119	125
1	5	11	13	23	26	36	38	41	50	55	62	67	69	79	88	90	94	97	104	108	121	122
1	5	11	13	23	26	36	38	41	50	55	62	67	69	79	88	90	94	97	104	108	121	125
1	5	11	13	23	26	36	38	41	50	55	62	67	69	79	88	90	94	97	104	108	119	122
1	5	11	13	23	26	36	38	41	50	55	62	67	69	79	88	90	94	97	104	108	119	125
1	5	11	13	23	26	36	38	41	44	55	62	67	69	79	88	90	94	97	104	107	121	122
1	5	11	13	23	26	36	38	41	44	55	62	67	69	79	88	90	94	97	104	107	121	125
1	5	11	13	23	26	36	38	41	44	55	62	67	69	79	88	90	94	97	104	107	119	122
1	5	11	13	23	26	36	38	41	44	55	62	67	69	79	88	90	94	97	104	107	119	125
1	5	11	13	23	26	36	38	41	44	55	62	67	69	79	88	90	94	97	104	108	121	122
1	5	11	13	23	26	36	38	41	44	55	62	67	69	79	88	90	94	97	104	108	121	125
1	5	11	13	23	26	36	38	41	44	55	62	67	69	79	88	90	94	97	104	108	119	122
1	5	11	13	23	26	36	38	41	44	55	62	67	69	79	88	90	94	97	104	108	119	125
1	6	11	22	23	25	36	38	41	53	55	62	67	69	79	88	90	94	97	104	107	121	122
1	6	11	22	23	25	36	38	41	53	55	62	67	69	79	88	90	94	97	104	107	121	125
1	6	11	22	23	25	36	38	41	53	55	62	67	69	79	88	90	94	97	104	107	119	122
1	6	11	22	23	25	36	38	41	53	55	62	67	69	79	88	90	94	97	104	107	119	125
1	6	11	22	23	25	36	38	41	53	55	62	67	69	79	88	90	94	97	104	108	121	122
1	6	11	22	23	25	36	38	41	53	55	62	67	69	79	88	90	94	97	104	108	121	125
1	6	11	22	23	25	36	38	41	53	55	62	67	69	79	88	90	94	97	104	108	119	122
1	6	11	22	23	25	36	38	41	53	55	62	67	69	79	88	90	94	97	104	108	119	125
1	6	11	22	23	25	36	38	41	50	55	62	67	69	79	88	90	94	97	104	107	121	122
1	6	11	22	23	25	36	38	41	50	55	62	67	69	79	88	90	94	97	104	107	121	125
1	6	11	22	23	25	36	38	41	50	55	62	67	69	79	88	90	94	97	104	107	119	122
1	6	11	22	23	25	36	38	41	50	55	62	67	69	79	88	90	94	97	104	107	119	125
1	6	11	22	23	25	36	38	41	50	55	62	67	69	79	88	90	94	97	104	108	121	122
1	6	11	22	23	25	36	38	41	50	55	62	67	69	79	88	90	94	97	104	108	121	125
1	6	11	22	23	25	36	38	41	50	55	62	67	69	79	88	90	94	97	104	108	119	122
1	6	11	22	23	25	36	38	41	50	55	62	67	69	79	88	90	94	97	104	108	119	125
1	6	11	22	23	25	36	38	41	44	55	62	67	69	79	88	90	94	97	104	107	121	122
1	6	11	22	23	25	36	38	41	44	55	62	67	69	79	88	90	94	97	104	107	121	125
1	6	11	22	23	25	36	38	41	44	55	62	67	69	79	88	90	94	97	104	107	119	122
1	6	11	22	23	25	36	38	41	44	55	62	67	69	79	88	90	94	97	104	107	119	125
1	6	11	22	23	25	36	38	41	44	55	62	67	69	79	88	90	94	97	104	108	121	122
1	6	11	22	23	25	36	38	41	44	55	62	67	69	79	88	90	94	97	104	108	121	125
1	6	11	22	23	25	36	38	41	44	55	62	67	69	79	88	90	94	97	104	108	119	122
1	6	11	22	23	25	36	38	41	44	55	62	67	69	79	88	90	94	97	104	108	119	125
1	6	11	22	23	26	36	38	41	53	55	62	67	69	79	88	90	94	97	104	107	121	122
1	6	11	22	23	26	36	38	41	53	55	62	67	69	79	88	90	94	97	104	107	121	125
1	6	11	22	23	26	36	38	41	53	55	62	67	69	79	88	90	94	97	104	107	119	122
1	6	11	22	23	26	36	38	41	53	55	62	67	69	79	88	90	94	97	104	107	119	125
1	6	11	22	23	26	36	38	41	53	55	62	67	69	79	88	90	94	97	104	108	121	122
1	6	11	22	23	26	36	38	41	53	55	62	67	69	79	88	90	94	97	104	108	121	125
1	6	11	22	23	26	36	38	41	53	55	62	67	69	79	88	90	94	97	104	108	119	122
1	6	11	22	23	26	36	38	41	53	55	62	67	69	79	88	90	94	97	104	108	119	125
1	6	11	22	23	26	36	38	41	50	55	62	67	69	79	88	90	94	97	104	107	121	122
1	6	11	22	23	26	36	38	41	50	55	62	67	69	79	88	90	94	97	104	107	121	125
1	6	11	22	23	26	36	38	41	50	55	62	67	69	79	88	90	94	97	104	107	119	122
1	6	11	22	23	26	36	38	41	50	55	62	67	69	79	88	90	94	97	104	107	119	125
1	6	11	22	23	26	36	38	41	50	55	62	67	69	79	88	90	94	97	104	108	121	122
1	6	11	22	23	26	36	38	41	50	55	62	67	69	79	88	90	94	97	104	108	121	125
1	6	11	22	23	26	36	38	41	50	55	62	67	69	79	88	90	94	97	104	108	119	122
1	6	11	22	23	26	36	38	41	50	55	62	67	69	79	88	90	94	97	104	108	119	125
1	6	11	22	23	26	36	38	41	44	55	62	67	69	79	88	90	94	97	104	107	121	122
1	6	11	22	23	26	36	38	41	44	55	62	67	69	79	88	90	94	97	104	107	121	125
1	6	11	22	23	26	36	38	41	44	55	62	67	69	79	88	90	94	97	104	107	119	122
1	6	11	22	23	26	36	38	41	44	55	62	67	69	79	88	90	94	97	104	107	119	125
1	6	11	22	23	26	36	38	41	44	55	62	67	69	79	88	90	94	97	104	108	121	122
1	6	11	22	23	26	36	38	41	44	55	62	67	69	79	88	90	94	97	104	108	121	125
1	6	11	22	23	26	36	38	41	44	55	62	67	69	79	88	90	94	97	104	108	119	122
1	6	11	22	23	26	36	38	41	44	55	62	67	69	79	88	90	94	97	104	108	119	125
1	6	11	13	23	25	36	38	41	53	55	62	67	69	79	88	90	94	97	104	107	121	122
1	6	11	13	23	25	36	38	41	53	55	62	67	69	79	88	90	94	97	104	107	121	125
1	6	11	13	23	25	36	38	41	53	55	62	67	69	79	88	90	94	97	104	107	119	122
1	6	11	13	23	25	36	38	41	53	55	62	67	69	79	88	90	94	97	104	107	119	125
1	6	11	13	23	25	36	38	41	53	55	62	67	69	79	88	90	94	97	104	108	121	122
1	6	11	13	23	25	36	38	41	53	55	62	67	69	79	88	90	94	97	104	108	121	125
1	6	11	13	23	25	36	38	41	53	55	62	67	69	79	88	90	94	97	104	108	119	122
1	6	11	13	23	25	36	38	41	53	55	62	67	69	79	88	90	94	97	104	108	119	125
1	6	11	13	23	25	36	38	41	50	55	62	67	69	79	88	90	94	97	104	107	121	122
1	6	11	13	23	25	36	38	41	50	55	62	67	69	79	88	90	94	97	104	107	121	125
1	6	11	13	23	25	36	38	41	50	55	62	67	69	79	88	90	94	97	104	107	119	122
1	6	11	13	23	25	36	38	41	50	55	62	67	69	79	88	90	94	97	104	107	119	125
1	6	11	13	23	25	36	38	41	50	55	62	67	69	79	88	90	94	97	104	108	121	122
1	6	11	13	23	25	36	38	41	50	55	62	67	69	79	88	90	94	97	104	108	121	125
1	6	11	13	23	25	36	38	41	50	55	62	67	69	79	88	90	94	97	104	108	119	122
1	6	11	13	23	25	36	38	41	50	55	62	67	69	79	88	90	94	97	104	108	119	125
1	6	11	13	23	25	36	38	41	44	55	62	67	69	79	88	90	94	97	104	107	121	122
1	6	11	13	23	25	36	38	41	44	55	62	67	69	79	88	90	94	97	104	107	121	125
1	6	11	13	23	25	36	38	41	44	55	62	67	69	79	88	90	94	97	104	107	119	122
1	6	11	13	23	25	36	38	41	44	55	62	67	69	79	88	90	94	97	104	107	119	125
1	6	11	13	23	25	36	38	41	44	55	62	67	69	79	88	90	94	97	104	108	121	122
1	6	11	13	23	25	36	38	41	44	55	62	67	69	79	88	90	94	97	104	108	121	125
1	6	11	13	23	25	36	38	41	44	55	62	67	69	79	88	90	94	97	104	108	119	122
1	6	11	13	23	25	36	38	41	44	55	62	67	69	79	88	90	94	97	104	108	119	125
1	6	11	13	23	26	36	38	41	53	55	62	67	69	79	88	90	94	97	104	107	121	122
1	6	11	13	23	26	36	38	41	53	55	62	67	69	79	88	90	94	97	104	107	121	125
1	6	11	13	23	26	36	38	41	53	55	62	67	69	79	88	90	94	97	104	107	119	122
1	6	11	13	23	26	36	38	41	53	55	62	67	69	79	88	90	94	97	104	107	119	125
1	6	11	13	23	26	36	38	41	53	55	62	67	69	79	88	90	94	97	104	108	121	122
1	6	11	13	23	26	36	38	41	53	55	62	67	69	79	88	90	94	97	104	108	121	125
1	6	11	13	23	26	36	38	41	53	55	62	67	69	79	88	90	94	97	104	108	119	122
1	6	11	13	23	26	36	38	41	53	55	62	67	69	79	88	90	94	97	104	108	119	125
1	6	11	13	23	26	36	38	41	50	55	62	67	69	79	88	90	94	97	104	107	121	122
1	6	11	13	23	26	36	38	41	50	55	62	67	69	79	88	90	94	97	104	107	121	125
1	6	11	13	23	26	36	38	41	50	55	62	67	69	79	88	90	94	97	104	107	119	122
1	6	11	13	23	26	36	38	41	50	55	62	67	69	79	88	90	94	97	104	107	119	125
1	6	11	13	23	26	36	38	41	50	55	62	67	69	79	88	90	94	97	104	108	121	122
1	6	11	13	23	26	36	38	41	50	55	62	67	69	79	88	90	94	97	104	108	121	125
1	6	11	13	23	26	36	38	41	50	55	62	67	69	79	88	90	94	97	104	108	119	122
1	6	11	13	23	26	36	38	41	50	55	62	67	69	79	88	90	94	97	104	108	119	125
1	6	11	13	23	26	36	38	41	44	55	62	67	69	79	88	90	94	97	104	107	121	122
1	6	11	13	23	26	36	38	41	44	55	62	67	69	79	88	90	94	97	104	107	121	125
1	6	11	13	23	26	36	38	41	44	55	62	67	69	79	88	90	94	97	104	107	119	122
1	6	11	13	23	26	36	38	41	44	55	62	67	69	79	88	90	94	97	104	107	119	125
1	6	11	13	23	26	36	38	41	44	55	62	67	69	79	88	90	94	97	104	108	121	122
1	6	11	13	23	26	36	38	41	44	55	62	67	69	79	88	90	94	97	104	108	121	125
1	6	11	13	23	26	36	38	41	44	55	62	67	69	79	88	90	94	97	104	108	119	122
1	6	11	13	23	26	36	38	41	44	55	62	67	69	79	88	90	94	97	104	108	119	125
1	5	9	16	24	31	36	38	42	47	55	60	67	71	79	88	90	94	97	104	107	121	126
1	5	9	16	24	31	36	38	42	47	55	60	67	71	79	88	90	94	97	104	107	120	126
1	5	9	16	24	31	36	38	42	47	55	60	67	71	79	88	90	94	97	104	108	121	126
1	5	9	16	24	31	36	38	42	47	55	60	67	71	79	88	90	94	97	104	108	120	126
1	5	9	16	24	31	36	38	42	50	55	60	67	71	79	88	90	94	97	104	107	121	126
1	5	9	16	24	31	36	38	42	50	55	60	67	71	79	88	90	94	97	104	107	120	126
1	5	9	16	24	31	36	38	42	50	55	60	67	71	79	88	90	94	97	104	108	121	126
1	5	9	16	24	31	36	38	42	50	55	60	67	71	79	88	90	94	97	104	108	120	126
1	5	9	16	24	31	36	38	42	43	55	60	67	71	79	88	90	94	97	104	107	121	126
1	5	9	16	24	31	36	38	42	43	55	60	67	71	79	88	90	94	97	104	107	120	126
1	5	9	16	24	31	36	38	42	43	55	60	67	71	79	88	90	94	97	104	108	121	126
1	5	9	16	24	31	36	38	42	43	55	60	67	71	79	88	90	94	97	104	108	120	126
1	5	9	16	24	31	36	38	42	44	55	60	67	71	79	88	90	94	97	104	107	121	126
1	5	9	16	24	31	36	38	42	44	55	60	67	71	79	88	90	94	97	104	107	120	126
1	5	9	16	24	31	36	38	42	44	55	60	67	71	79	88	90	94	97	104	108	121	126
1	5	9	16	24	31	36	38	42	44	55	60	67	71	79	88	90	94	97	104	108	120	126
1	5	9	13	24	31	36	38	42	47	55	60	67	71	79	88	90	94	97	104	107	121	126
1	5	9	13	24	31	36	38	42	47	55	60	67	71	79	88	90	94	97	104	107	120	126
1	5	9	13	24	31	36	38	42	47	55	60	67	71	79	88	90	94	97	104	108	121	126
1	5	9	13	24	31	36	38	42	47	55	60	67	71	79	88	90	94	97	104	108	120	126
1	5	9	13	24	31	36	38	42	50	55	60	67	71	79	88	90	94	97	104	107	121	126
1	5	9	13	24	31	36	38	42	50	55	60	67	71	79	88	90	94	97	104	107	120	126
1	5	9	13	24	31	36	38	42	50	55	60	67	71	79	88	90	94	97	104	108	121	126
1	5	9	13	24	31	36	38	42	50	55	60	67	71	79	88	90	94	97	104	108	120	126
1	5	9	13	24	31	36	38	42	43	55	60	67	71	79	88	90	94	97	104	107	121	126
1	5	9	13	24	31	36	38	42	43	55	60	67	71	79	88	90	94	97	104	107	120	126
1	5	9	13	24	31	36	38	42	43	55	60	67	71	79	88	90	94	97	104	108	121	126
1	5	9	13	24	31	36	38	42	43	55	60	67	71	79	88	90	94	97	104	108	120	126
1	5	9	13	24	31	36	38	42	44	55	60	67	71	79	88	90	94	97	104	107	121	126
1	5	9	13	24	31	36	38	42	44	55	60	67	71	79	88	90	94	97	104	107	120	126
1	5	9	13	24	31	36	38	42	44	55	60	67	71	79	88	90	94	97	104	108	121	126
1	5	9	13	24	31	36	38	42	44	55	60	67	71	79	88	90	94	97	104	108	120	126
1	6	9	16	24	31	36	38	42	47	55	60	67	71	79	88	90	94	97	104	107	121	126
1	6	9	16	24	31	36	38	42	47	55	60	67	71	79	88	90	94	97	104	107	120	126
1	6	9	16	24	31	36	38	42	47	55	60	67	71	79	88	90	94	97	104	108	121	126
1	6	9	16	24	31	36	38	42	47	55	60	67	71	79	88	90	94	97	104	108	120	126
1	6	9	16	24	31	36	38	42	50	55	60	67	71	79	88	90	94	97	104	107	121	126
1	6	9	16	24	31	36	38	42	50	55	60	67	71	79	88	90	94	97	104	107	120	126
1	6	9	16	24	31	36	38	42	50	55	60	67	71	79	88	90	94	97	104	108	121	126
1	6	9	16	24	31	36	38	42	50	55	60	67	71	79	88	90	94	97	104	108	120	126
1	6	9	16	24	31	36	38	42	43	55	60	67	71	79	88	90	94	97	104	107	121	126
1	6	9	16	24	31	36	38	42	43	55	60	67	71	79	88	90	94	97	104	107	120	126
1	6	9	16	24	31	36	38	42	43	55	60	67	71	79	88	90	94	97	104	108	121	126
1	6	9	16	24	31	36	38	42	43	55	60	67	71	79	88	90	94	97	104	108	120	126
1	6	9	16	24	31	36	38	42	44	55	60	67	71	79	88	90	94	97	104	107	121	126
1	6	9	16	24	31	36	38	42	44	55	60	67	71	79	88	90	94	97	104	107	120	126
1	6	9	16	24	31	36	38	42	44	55	60	67	71	79	88	90	94	97	104	108	121	126
1	6	9	16	24	31	36	38	42	44	55	60	67	71	79	88	90	94	97	104	108	120	126
1	6	9	13	24	31	36	38	42	47	55	60	67	71	79	88	90	94	97	104	107	121	126
1	6	9	13	24	31	36	38	42	47	55	60	67	71	79	88	90	94	97	104	107	120	126
1	6	9	13	24	31	36	38	42	47	55	60	67	71	79	88	90	94	97	104	108	121	126
1	6	9	13	24	31	36	38	42	47	55	60	67	71	79	88	90	94	97	104	108	120	126
1	6	9	13	24	31	36	38	42	50	55	60	67	71	79	88	90	94	97	104	107	121	126
1	6	9	13	24	31	36	38	42	50	55	60	67	71	79	88	90	94	97	104	107	120	126
1	6	9	13	24	31	36	38	42	50	55	60	67	71	79	88	90	94	97	104	108	121	126
1	6	9	13	24	31	36	38	42	50	55	60	67	71	79	88	90	94	97	104	108	120	126
1	6	9	13	24	31	36	38	42	43	55	60	67	71	79	88	90	94	97	104	107	121	126
1	6	9	13	24	31	36	38	42	43	55	60	67	71	79	88	90	94	97	104	107	120	126
1	6	9	13	24	31	36	38	42	43	55	60	67	71	79	88	90	94	97	104	108	121	126
1	6	9	13	24	31	36	38	42	43	55	60	67	71	79	88	90	94	97	104	108	120	126
1	6	9	13	24	31	36	38	42	44	55	60	67	71	79	88	90	94	97	104	107	121	126
1	6	9	13	24	31	36	38	42	44	55	60	67	71	79	88	90	94	97	104	107	120	126
1	6	9	13	24	31	36	38	42	44	55	60	67	71	79	88	90	94	97	104	108	121	126
1	6	9	13	24	31	36	38	42	44	55	60	67	71	79	88	90	94	97	104	108	120	126
1	8	9	16	24	31	36	38	42	47	55	60	67	71	79	88	90	94	97	104	107	121	126
1	8	9	16	24	31	36	38	42	47	55	60	67	71	79	88	90	94	97	104	107	120	126
1	8	9	16	24	31	36	38	42	47	55	60	67	71	79	88	90	94	97	104	108	121	126
1	8	9	16	24	31	36	38	42	47	55	60	67	71	79	88	90	94	97	104	108	120	126
1	8	9	16	24	31	36	38	42	50	55	60	67	71	79	88	90	94	97	104	107	121	126
1	8	9	16	24	31	36	38	42	50	55	60	67	71	79	88	90	94	97	104	107	120	126
1	8	9	16	24	31	36	38	42	50	55	60	67	71	79	88	90	94	97	104	108	121	126
1	8	9	16	24	31	36	38	42	50	55	60	67	71	79	88	90	94	97	104	108	120	126
1	8	9	16	24	31	36	38	42	43	55	60	67	71	79	88	90	94	97	104	107	121	126
1	8	9	16	24	31	36	38	42	43	55	60	67	71	79	88	90	94	97	104	107	120	126
1	8	9	16	24	31	36	38	42	43	55	60	67	71	79	88	90	94	97	104	108	121	126
1	8	9	16	24	31	36	38	42	43	55	60	67	71	79	88	90	94	97	104	108	120	126
1	8	9	16	24	31	36	38	42	44	55	60	67	71	79	88	90	94	97	104	107	121	126
1	8	9	16	24	31	36	38	42	44	55	60	67	71	79	88	90	94	97	104	107	120	126
1	8	9	16	24	31	36	38	42	44	55	60	67	71	79	88	90	94	97	104	108	121	126
1	8	9	16	24	31	36	38	42	44	55	60	67	71	79	88	90	94	97	104	108	120	126
1	8	9	13	24	31	36	38	42	47	55	60	67	71	79	88	90	94	97	104	107	121	126
1	8	9	13	24	31	36	38	42	47	55	60	67	71	79	88	90	94	97	104	107	120	126
1	8	9	13	24	31	36	38	42	47	55	60	67	71	79	88	90	94	97	104	108	121	126
1	8	9	13	24	31	36	38	42	47	55	60	67	71	79	88	90	94	97	104	108	120	126
1	8	9	13	24	31	36	38	42	50	55	60	67	71	79	88	90	94	97	104	107	121	126
1	8	9	13	24	31	36	38	42	50	55	60	67	71	79	88	90	94	97	104	107	120	126
1	8	9	13	24	31	36	38	42	50	55	60	67	71	79	88	90	94	97	104	108	121	126
1	8	9	13	24	31	36	38	42	50	55	60	67	71	79	88	90	94	97	104	108	120	126
1	8	9	13	24	31	36	38	42	43	55	60	67	71	79	88	90	94	97	104	107	121	126
1	8	9	13	24	31	36	38	42	43	55	60	67	71	79	88	90	94	97	104	107	120	126
1	8	9	13	24	31	36	38	42	43	55	60	67	71	79	88	90	94	97	104	108	121	126
1	8	9	13	24	31	36	38	42	43	55	60	67	71	79	88	90	94	97	104	108	120	126
1	8	9	13	24	31	36	38	42	44	55	60	67	71	79	88	90	94	97	104	107	121	126
1	8	9	13	24	31	36	38	42	44	55	60	67	71	79	88	90	94	97	104	107	120	126
1	8	9	13	24	31	36	38	42	44	55	60	67	71	79	88	90	94	97	104	108	121	126
1	8	9	13	24	31	36	38	42	44	55	60	67	71	79	88	90	94	97	104	108	120	126
2	5	12	21	23	32	36	38	42	53	55	60	67	71	79	88	90	94	97	104	107	119	126
2	5	12	21	23	32	36	38	42	53	55	60	67	71	79	88	90	94	97	104	107	119	122
2	5	12	21	23	32	36	38	42	53	55	60	67	71	79	88	90	94	97	104	107	120	126
2	5	12	21	23	32	36	38	42	53	55	60	67	71	79	88	90	94	97	104	107	120	122
2	5	12	21	23	32	36	38	42	53	55	60	67	71	79	88	90	94	97	104	108	119	126
2	5	12	21	23	32	36	38	42	53	55	60	67	71	79	88	90	94	97	104	108	119	122
2	5	12	21	23	32	36	38	42	53	55	60	67	71	79	88	90	94	97	104	108	120	126
2	5	12	21	23	32	36	38	42	53	55	60	67	71	79	88	90	94	97	104	108	120	122
2	5	12	21	23	32	36	38	42	50	55	60	67	71	79	88	90	94	97	104	107	119	126
2	5	12	21	23	32	36	38	42	50	55	60	67	71	79	88	90	94	97	104	107	119	122
2	5	12	21	23	32	36	38	42	50	55	60	67	71	79	88	90	94	97	104	107	120	126
2	5	12	21	23	32	36	38	42	50	55	60	67	71	79	88	90	94	97	104	107	120	122
2	5	12	21	23	32	36	38	42	50	55	60	67	71	79	88	90	94	97	104	108	119	126
2	5	12	21	23	32	36	38	42	50	55	60	67	71	79	88	90	94	97	104	108	119	122
2	5	12	21	23	32	36	38	42	50	55	60	67	71	79	88	90	94	97	104	108	120	126
2	5	12	21	23	32	36	38	42	50	55	60	67	71	79	88	90	94	97	104	108	120	122
2	5	12	21	23	32	36	38	42	43	55	60	67	71	79	88	90	94	97	104	107	119	126
2	5	12	21	23	32	36	38	42	43	55	60	67	71	79	88	90	94	97	104	107	119	122
2	5	12	21	23	32	36	38	42	43	55	60	67	71	79	88	90	94	97	104	107	120	126
2	5	12	21	23	32	36	38	42	43	55	60	67	71	79	88	90	94	97	104	107	120	122
2	5	12	21	23	32	36	38	42	43	55	60	67	71	79	88	90	94	97	104	108	119	126
2	5	12	21	23	32	36	38	42	43	55	60	67	71	79	88	90	94	97	104	108	119	122
2	5	12	21	23	32	36	38	42	43	55	60	67	71	79	88	90	94	97	104	108	120	126
2	5	12	21	23	32	36	38	42	43	55	60	67	71	79	88	90	94	97	104	108	120	122
2	5	12	21	23	32	36	38	42	44	55	60	67	71	79	88	90	94	97	104	107	119	126
2	5	12	21	23	32	36	38	42	44	55	60	67	71	79	88	90	94	97	104	107	119	122
2	5	12	21	23	32	36	38	42	44	55	60	67	71	79	88	90	94	97	104	107	120	126
2	5	12	21	23	32	36	38	42	44	55	60	67	71	79	88	90	94	97	104	107	120	122
2	5	12	21	23	32	36	38	42	44	55	60	67	71	79	88	90	94	97	104	108	119	126
2	5	12	21	23	32	36	38	42	44	55	60	67	71	79	88	90	94	97	104	108	119	122
2	5	12	21	23	32	36	38	42	44	55	60	67	71	79	88	90	94	97	104	108	120	126
2	5	12	21	23	32	36	38	42	44	55	60	67	71	79	88	90	94	97	104	108	120	122
2	5	12	13	23	32	36	38	42	53	55	60	67	71	79	88	90	94	97	104	107	119	126
2	5	12	13	23	32	36	38	42	53	55	60	67	71	79	88	90	94	97	104	107	119	122
2	5	12	13	23	32	36	38	42	53	55	60	67	71	79	88	90	94	97	104	107	120	126
2	5	12	13	23	32	36	38	42	53	55	60	67	71	79	88	90	94	97	104	107	120	122
2	5	12	13	23	32	36	38	42	53	55	60	67	71	79	88	90	94	97	104	108	119	126
2	5	12	13	23	32	36	38	42	53	55	60	67	71	79	88	90	94	97	104	108	119	122
2	5	12	13	23	32	36	38	42	53	55	60	67	71	79	88	90	94	97	104	108	120	126
2	5	12	13	23	32	36	38	42	53	55	60	67	71	79	88	90	94	97	104	108	120	122
2	5	12	13	23	32	36	38	42	50	55	60	67	71	79	88	90	94	97	104	107	119	126
2	5	12	13	23	32	36	38	42	50	55	60	67	71	79	88	90	94	97	104	107	119	122
2	5	12	13	23	32	36	38	42	50	55	60	67	71	79	88	90	94	97	104	107	120	126
2	5	12	13	23	32	36	38	42	50	55	60	67	71	79	88	90	94	97	104	107	120	122
2	5	12	13	23	32	36	38	42	50	55	60	67	71	79	88	90	94	97	104	108	119	126
2	5	12	13	23	32	36	38	42	50	55	60	67	71	79	88	90	94	97	104	108	119	122
2	5	12	13	23	32	36	38	42	50	55	60	67	71	79	88	90	94	97	104	108	120	126
2	5	12	13	23	32	36	38	42	50	55	60	67	71	79	88	90	94	97	104	108	120	122
2	5	12	13	23	32	36	38	42	43	55	60	67	71	79	88	90	94	97	104	107	119	126
2	5	12	13	23	32	36	38	42	43	55	60	67	71	79	88	90	94	97	104	107	119	122
2	5	12	13	23	32	36	38	42	43	55	60	67	71	79	88	90	94	97	104	107	120	126
2	5	12	13	23	32	36	38	42	43	55	60	67	71	79	88	90	94	97	104	107	120	122
2	5	12	13	23	32	36	38	42	43	55	60	67	71	79	88	90	94	97	104	108	119	126
2	5	12	13	23	32	36	38	42	43	55	60	67	71	79	88	90	94	97	104	108	119	122
2	5	12	13	23	32	36	38	42	43	55	60	67	71	79	88	90	94	97	104	108	120	126
2	5	12	13	23	32	36	38	42	43	55	60	67	71	79	88	90	94	97	104	108	120	122
2	5	12	13	23	32	36	38	42	44	55	60	67	71	79	88	90	94	97	104	107	119	126
2	5	12	13	23	32	36	38	42	44	55	60	67	71	79	88	90	94	97	104	107	119	122
2	5	12	13	23	32	36	38	42	44	55	60	67	71	79	88	90	94	97	104	107	120	126
2	5	12	13	23	32	36	38	42	44	55	60	67	71	79	88	90	94	97	104	107	120	122
2	5	12	13	23	32	36	38	42	44	55	60	67	71	79	88	90	94	97	104	108	119	126
2	5	12	13	23	32	36	38	42	44	55	60	67	71	79	88	90	94	97	104	108	119	122
2	5	12	13	23	32	36	38	42	44	55	60	67	71	79	88	90	94	97	104	108	120	126
2	5	12	13	23	32	36	38	42	44	55	60	67	71	79	88	90	94	97	104	108	120	122
2	5	11	21	23	32	36	38	42	53	55	60	67	71	79	88	90	94	97	104	107	119	126
2	5	11	21	23	32	36	38	42	53	55	60	67	71	79	88	90	94	97	104	107	119	122
2	5	11	21	23	32	36	38	42	53	55	60	67	71	79	88	90	94	97	104	107	120	126
2	5	11	21	23	32	36	38	42	53	55	60	67	71	79	88	90	94	97	104	107	120	122
2	5	11	21	23	32	36	38	42	53	55	60	67	71	79	88	90	94	97	104	108	119	126
2	5	11	21	23	32	36	38	42	53	55	60	67	71	79	88	90	94	97	104	108	119	122
2	5	11	21	23	32	36	38	42	53	55	60	67	71	79	88	90	94	97	104	108	120	126
2	5	11	21	23	32	36	38	42	53	55	60	67	71	79	88	90	94	97	104	108	120	122
2	5	11	21	23	32	36	38	42	50	55	60	67	71	79	88	90	94	97	104	107	119	126
2	5	11	21	23	32	36	38	42	50	55	60	67	71	79	88	90	94	97	104	107	119	122
2	5	11	21	23	32	36	38	42	50	55	60	67	71	79	88	90	94	97	104	107	120	126
2	5	11	21	23	32	36	38	42	50	55	60	67	71	79	88	90	94	97	104	107	120	122
2	5	11	21	23	32	36	38	42	50	55	60	67	71	79	88	90	94	97	104	108	119	126
2	5	11	21	23	32	36	38	42	50	55	60	67	71	79	88	90	94	97	104	108	119	122
2	5	11	21	23	32	36	38	42	50	55	60	67	71	79	88	90	94	97	104	108	120	126
2	5	11	21	23	32	36	38	42	50	55	60	67	71	79	88	90	94	97	104	108	120	122
2	5	11	21	23	32	36	38	42	43	55	60	67	71	79	88	90	94	97	104	107	119	126
2	5	11	21	23	32	36	38	42	43	55	60	67	71	79	88	90	94	97	104	107	119	122
2	5	11	21	23	32	36	38	42	43	55	60	67	71	79	88	90	94	97	104	107	120	126
2	5	11	21	23	32	36	38	42	43	55	60	67	71	79	88	90	94	97	104	107	120	122
2	5	11	21	23	32	36	38	42	43	55	60	67	71	79	88	90	94	97	104	108	119	126
2	5	11	21	23	32	36	38	42	43	55	60	67	71	79	88	90	94	97	104	108	119	122
2	5	11	21	23	32	36	38	42	43	55	60	67	71	79	88	90	94	97	104	108	120	126
2	5	11	21	23	32	36	38	42	43	55	60	67	71	79	88	90	94	97	104	108	120	122
2	5	11	21	23	32	36	38	42	44	55	60	67	71	79	88	90	94	97	104	107	119	126
2	5	11	21	23	32	36	38	42	44	55	60	67	71	79	88	90	94	97	104	107	119	122
2	5	11	21	23	32	36	38	42	44	55	60	67	71	79	88	90	94	97	104	107	120	126
2	5	11	21	23	32	36	38	42	44	55	60	67	71	79	88	90	94	97	104	107	120	122
2	5	11	21	23	32	36	38	42	44	55	60	67	71	79	88	90	94	97	104	108	119	126
2	5	11	21	23	32	36	38	42	44	55	60	67	71	79	88	90	94	97	104	108	119	122
2	5	11	21	23	32	36	38	42	44	55	60	67	71	79	88	90	94	97	104	108	120	126
2	5	11	21	23	32	36	38	42	44	55	60	67	71	79	88	90	94	97	104	108	120	122
2	5	11	13	23	32	36	38	42	53	55	60	67	71	79	88	90	94	97	104	107	119	126
2	5	11	13	23	32	36	38	42	53	55	60	67	71	79	88	90	94	97	104	107	119	122
2	5	11	13	23	32	36	38	42	53	55	60	67	71	79	88	90	94	97	104	107	120	126
2	5	11	13	23	32	36	38	42	53	55	60	67	71	79	88	90	94	97	104	107	120	122
2	5	11	13	23	32	36	38	42	53	55	60	67	71	79	88	90	94	97	104	108	119	126
2	5	11	13	23	32	36	38	42	53	55	60	67	71	79	88	90	94	97	104	108	119	122
2	5	11	13	23	32	36	38	42	53	55	60	67	71	79	88	90	94	97	104	108	120	126
2	5	11	13	23	32	36	38	42	53	55	60	67	71	79	88	90	94	97	104	108	120	122
2	5	11	13	23	32	36	38	42	50	55	60	67	71	79	88	90	94	97	104	107	119	126
2	5	11	13	23	32	36	38	42	50	55	60	67	71	79	88	90	94	97	104	107	119	122
2	5	11	13	23	32	36	38	42	50	55	60	67	71	79	88	90	94	97	104	107	120	126
2	5	11	13	23	32	36	38	42	50	55	60	67	71	79	88	90	94	97	104	107	120	122
2	5	11	13	23	32	36	38	42	50	55	60	67	71	79	88	90	94	97	104	108	119	126
2	5	11	13	23	32	36	38	42	50	55	60	67	71	79	88	90	94	97	104	108	119	122
2	5	11	13	23	32	36	38	42	50	55	60	67	71	79	88	90	94	97	104	108	120	126
2	5	11	13	23	32	36	38	42	50	55	60	67	71	79	88	90	94	97	104	108	120	122
2	5	11	13	23	32	36	38	42	43	55	60	67	71	79	88	90	94	97	104	107	119	126
2	5	11	13	23	32	36	38	42	43	55	60	67	71	79	88	90	94	97	104	107	119	122
2	5	11	13	23	32	36	38	42	43	55	60	67	71	79	88	90	94	97	104	107	120	126
2	5	11	13	23	32	36	38	42	43	55	60	67	71	79	88	90	94	97	104	107	120	122
2	5	11	13	23	32	36	38	42	43	55	60	67	71	79	88	90	94	97	104	108	119	126
2	5	11	13	23	32	36	38	42	43	55	60	67	71	79	88	90	94	97	104	108	119	122
2	5	11	13	23	32	36	38	42	43	55	60	67	71	79	88	90	94	97	104	108	120	126
2	5	11	13	23	32	36	38	42	43	55	60	67	71	79	88	90	94	97	104	108	120	122
2	5	11	13	23	32	36	38	42	44	55	60	67	71	79	88	90	94	97	104	107	119	126
2	5	11	13	23	32	36	38	42	44	55	60	67	71	79	88	90	94	97	104	107	119	122
2	5	11	13	23	32	36	38	42	44	55	60	67	71	79	88	90	94	97	104	107	120	126
2	5	11	13	23	32	36	38	42	44	55	60	67	71	79	88	90	94	97	104	107	120	122
2	5	11	13	23	32	36	38	42	44	55	60	67	71	79	88	90	94	97	104	108	119	126
2	5	11	13	23	32	36	38	42	44	55	60	67	71	79	88	90	94	97	104	108	119	122
2	5	11	13	23	32	36	38	42	44	55	60	67	71	79	88	90	94	97	104	108	120	126
2	5	11	13	23	32	36	38	42	44	55	60	67	71	79	88	90	94	97	104	108	120	122
2	6	12	21	23	32	36	38	42	53	55	60	67	71	79	88	90	94	97	104	107	119	126
2	6	12	21	23	32	36	38	42	53	55	60	67	71	79	88	90	94	97	104	107	119	122
2	6	12	21	23	32	36	38	42	53	55	60	67	71	79	88	90	94	97	104	107	120	126
2	6	12	21	23	32	36	38	42	53	55	60	67	71	79	88	90	94	97	104	107	120	122
2	6	12	21	23	32	36	38	42	53	55	60	67	71	79	88	90	94	97	104	108	119	126
2	6	12	21	23	32	36	38	42	53	55	60	67	71	79	88	90	94	97	104	108	119	122
2	6	12	21	23	32	36	38	42	53	55	60	67	71	79	88	90	94	97	104	108	120	126
2	6	12	21	23	32	36	38	42	53	55	60	67	71	79	88	90	94	97	104	108	120	122
2	6	12	21	23	32	36	38	42	50	55	60	67	71	79	88	90	94	97	104	107	119	126
2	6	12	21	23	32	36	38	42	50	55	60	67	71	79	88	90	94	97	104	107	119	122
2	6	12	21	23	32	36	38	42	50	55	60	67	71	79	88	90	94	97	104	107	120	126
2	6	12	21	23	32	36	38	42	50	55	60	67	71	79	88	90	94	97	104	107	120	122
2	6	12	21	23	32	36	38	42	50	55	60	67	71	79	88	90	94	97	104	108	119	126
2	6	12	21	23	32	36	38	42	50	55	60	67	71	79	88	90	94	97	104	108	119	122
2	6	12	21	23	32	36	38	42	50	55	60	67	71	79	88	90	94	97	104	108	120	126
2	6	12	21	23	32	36	38	42	50	55	60	67	71	79	88	90	94	97	104	108	120	122
2	6	12	21	23	32	36	38	42	43	55	60	67	71	79	88	90	94	97	104	107	119	126
2	6	12	21	23	32	36	38	42	43	55	60	67	71	79	88	90	94	97	104	107	119	122
2	6	12	21	23	32	36	38	42	43	55	60	67	71	79	88	90	94	97	104	107	120	126
2	6	12	21	23	32	36	38	42	43	55	60	67	71	79	88	90	94	97	104	107	120	122
2	6	12	21	23	32	36	38	42	43	55	60	67	71	79	88	90	94	97	104	108	119	126
2	6	12	21	23	32	36	38	42	43	55	60	67	71	79	88	90	94	97	104	108	119	122
2	6	12	21	23	32	36	38	42	43	55	60	67	71	79	88	90	94	97	104	108	120	126
2	6	12	21	23	32	36	38	42	43	55	60	67	71	79	88	90	94	97	104	108	120	122
2	6	12	21	23	32	36	38	42	44	55	60	67	71	79	88	90	94	97	104	107	119	126
2	6	12	21	23	32	36	38	42	44	55	60	67	71	79	88	90	94	97	104	107	119	122
2	6	12	21	23	32	36	38	42	44	55	60	67	71	79	88	90	94	97	104	107	120	126
2	6	12	21	23	32	36	38	42	44	55	60	67	71	79	88	90	94	97	104	107	120	122
2	6	12	21	23	32	36	38	42	44	55	60	67	71	79	88	90	94	97	104	108	119	126
2	6	12	21	23	32	36	38	42	44	55	60	67	71	79	88	90	94	97	104	108	119	122
2	6	12	21	23	32	36	38	42	44	55	60	67	71	79	88	90	94	97	104	108	120	126
2	6	12	21	23	32	36	38	42	44	55	60	67	71	79	88	90	94	97	104	108	120	122
2	6	12	13	23	32	36	38	42	53	55	60	67	71	79	88	90	94	97	104	107	119	126
2	6	12	13	23	32	36	38	42	53	55	60	67	71	79	88	90	94	97	104	107	119	122
2	6	12	13	23	32	36	38	42	53	55	60	67	71	79	88	90	94	97	104	107	120	126
2	6	12	13	23	32	36	38	42	53	55	60	67	71	79	88	90	94	97	104	107	120	122
2	6	12	13	23	32	36	38	42	53	55	60	67	71	79	88	90	94	97	104	108	119	126
2	6	12	13	23	32	36	38	42	53	55	60	67	71	79	88	90	94	97	104	108	119	122
2	6	12	13	23	32	36	38	42	53	55	60	67	71	79	88	90	94	97	104	108	120	126
2	6	12	13	23	32	36	38	42	53	55	60	67	71	79	88	90	94	97	104	108	120	122
2	6	12	13	23	32	36	38	42	50	55	60	67	71	79	88	90	94	97	104	107	119	126
2	6	12	13	23	32	36	38	42	50	55	60	67	71	79	88	90	94	97	104	107	119	122
2	6	12	13	23	32	36	38	42	50	55	60	67	71	79	88	90	94	97	104	107	120	126
2	6	12	13	23	32	36	38	42	50	55	60	67	71	79	88	90	94	97	104	107	120	122
2	6	12	13	23	32	36	38	42	50	55	60	67	71	79	88	90	94	97	104	108	119	126
2	6	12	13	23	32	36	38	42	50	55	60	67	71	79	88	90	94	97	104	108	119	122
2	6	12	13	23	32	36	38	42	50	55	60	67	71	79	88	90	94	97	104	108	120	126
2	6	12	13	23	32	36	38	42	50	55	60	67	71	79	88	90	94	97	104	108	120	122
2	6	12	13	23	32	36	38	42	43	55	60	67	71	79	88	90	94	97	104	107	119	126
2	6	12	13	23	32	36	38	42	43	55	60	67	71	79	88	90	94	97	104	107	119	122
2	6	12	13	23	32	36	38	42	43	55	60	67	71	79	88	90	94	97	104	107	120	126
2	6	12	13	23	32	36	38	42	43	55	60	67	71	79	88	90	94	97	104	107	120	122
2	6	12	13	23	32	36	38	42	43	55	60	67	71	79	88	90	94	97	104	108	119	126
2	6	12	13	23	32	36	38	42	43	55	60	67	71	79	88	90	94	97	104	108	119	122
2	6	12	13	23	32	36	38	42	43	55	60	67	71	79	88	90	94	97	104	108	120	126
2	6	12	13	23	32	36	38	42	43	55	60	67	71	79	88	90	94	97	104	108	120	122
2	6	12	13	23	32	36	38	42	44	55	60	67	71	79	88	90	94	97	104	107	119	126
2	6	12	13	23	32	36	38	42	44	55	60	67	71	79	88	90	94	97	104	107	119	122
2	6	12	13	23	32	36	38	42	44	55	60	67	71	79	88	90	94	97	104	107	120	126
2	6	12	13	23	32	36	38	42	44	55	60	67	71	79	88	90	94	97	104	107	120	122
2	6	12	13	23	32	36	38	42	44	55	60	67	71	79	88	90	94	97	104	108	119	126
2	6	12	13	23	32	36	38	42	44	55	60	67	71	79	88	90	94	97	104	108	119	122
2	6	12	13	23	32	36	38	42	44	55	60	67	71	79	88	90	94	97	104	108	120	126
2	6	12	13	23	32	36	38	42	44	55	60	67	71	79	88	90	94	97	104	108	120	122
2	6	11	21	23	32	36	38	42	53	55	60	67	71	79	88	90	94	97	104	107	119	126
2	6	11	21	23	32	36	38	42	53	55	60	67	71	79	88	90	94	97	104	107	119	122
2	6	11	21	23	32	36	38	42	53	55	60	67	71	79	88	90	94	97	104	107	120	126
2	6	11	21	23	32	36	38	42	53	55	60	67	71	79	88	90	94	97	104	107	120	122
2	6	11	21	23	32	36	38	42	53	55	60	67	71	79	88	90	94	97	104	108	119	126
2	6	11	21	23	32	36	38	42	53	55	60	67	71	79	88	90	94	97	104	108	119	122
2	6	11	21	23	32	36	38	42	53	55	60	67	71	79	88	90	94	97	104	108	120	126
2	6	11	21	23	32	36	38	42	53	55	60	67	71	79	88	90	94	97	104	108	120	122
2	6	11	21	23	32	36	38	42	50	55	60	67	71	79	88	90	94	97	104	107	119	126
2	6	11	21	23	32	36	38	42	50	55	60	67	71	79	88	90	94	97	104	107	119	122
2	6	11	21	23	32	36	38	42	50	55	60	67	71	79	88	90	94	97	104	107	120	126
2	6	11	21	23	32	36	38	42	50	55	60	67	71	79	88	90	94	97	104	107	120	122
2	6	11	21	23	32	36	38	42	50	55	60	67	71	79	88	90	94	97	104	108	119	126
2	6	11	21	23	32	36	38	42	50	55	60	67	71	79	88	90	94	97	104	108	119	122
2	6	11	21	23	32	36	38	42	50	55	60	67	71	79	88	90	94	97	104	108	120	126
2	6	11	21	23	32	36	38	42	50	55	60	67	71	79	88	90	94	97	104	108	120	122
2	6	11	21	23	32	36	38	42	43	55	60	67	71	79	88	90	94	97	104	107	119	126
2	6	11	21	23	32	36	38	42	43	55	60	67	71	79	88	90	94	97	104	107	119	122
2	6	11	21	23	32	36	38	42	43	55	60	67	71	79	88	90	94	97	104	107	120	126
2	6	11	21	23	32	36	38	42	43	55	60	67	71	79	88	90	94	97	104	107	120	122
2	6	11	21	23	32	36	38	42	43	55	60	67	71	79	88	90	94	97	104	108	119	126
2	6	11	21	23	32	36	38	42	43	55	60	67	71	79	88	90	94	97	104	108	119	122
2	6	11	21	23	32	36	38	42	43	55	60	67	71	79	88	90	94	97	104	108	120	126
2	6	11	21	23	32	36	38	42	43	55	60	67	71	79	88	90	94	97	104	108	120	122
2	6	11	21	23	32	36	38	42	44	55	60	67	71	79	88	90	94	97	104	107	119	126
2	6	11	21	23	32	36	38	42	44	55	60	67	71	79	88	90	94	97	104	107	119	122
2	6	11	21	23	32	36	38	42	44	55	60	67	71	79	88	90	94	97	104	107	120	126
2	6	11	21	23	32	36	38	42	44	55	60	67	71	79	88	90	94	97	104	107	120	122
2	6	11	21	23	32	36	38	42	44	55	60	67	71	79	88	90	94	97	104	108	119	126
2	6	11	21	23	32	36	38	42	44	55	60	67	71	79	88	90	94	97	104	108	119	122
2	6	11	21	23	32	36	38	42	44	55	60	67	71	79	88	90	94	97	104	108	120	126
2	6	11	21	23	32	36	38	42	44	55	60	67	71	79	88	90	94	97	104	108	120	122
2	6	11	13	23	32	36	38	42	53	55	60	67	71	79	88	90	94	97	104	107	119	126
2	6	11	13	23	32	36	38	42	53	55	60	67	71	79	88	90	94	97	104	107	119	122
2	6	11	13	23	32	36	38	42	53	55	60	67	71	79	88	90	94	97	104	107	120	126
2	6	11	13	23	32	36	38	42	53	55	60	67	71	79	88	90	94	97	104	107	120	122
2	6	11	13	23	32	36	38	42	53	55	60	67	71	79	88	90	94	97	104	108	119	126
2	6	11	13	23	32	36	38	42	53	55	60	67	71	79	88	90	94	97	104	108	119	122
2	6	11	13	23	32	36	38	42	53	55	60	67	71	79	88	90	94	97	104	108	120	126
2	6	11	13	23	32	36	38	42	53	55	60	67	71	79	88	90	94	97	104	108	120	122
2	6	11	13	23	32	36	38	42	50	55	60	67	71	79	88	90	94	97	104	107	119	126
2	6	11	13	23	32	36	38	42	50	55	60	67	71	79	88	90	94	97	104	107	119	122
2	6	11	13	23	32	36	38	42	50	55	60	67	71	79	88	90	94	97	104	107	120	126
2	6	11	13	23	32	36	38	42	50	55	60	67	71	79	88	90	94	97	104	107	120	122
2	6	11	13	23	32	36	38	42	50	55	60	67	71	79	88	90	94	97	104	108	119	126
2	6	11	13	23	32	36	38	42	50	55	60	67	71	79	88	90	94	97	104	108	119	122
2	6	11	13	23	32	36	38	42	50	55	60	67	71	79	88	90	94	97	104	108	120	126
2	6	11	13	23	32	36	38	42	50	55	60	67	71	79	88	90	94	97	104	108	120	122
2	6	11	13	23	32	36	38	42	43	55	60	67	71	79	88	90	94	97	104	107	119	126
2	6	11	13	23	32	36	38	42	43	55	60	67	71	79	88	90	94	97	104	107	119	122
2	6	11	13	23	32	36	38	42	43	55	60	67	71	79	88	90	94	97	104	107	120	126
2	6	11	13	23	32	36	38	42	43	55	60	67	71	79	88	90	94	97	104	107	120	122
2	6	11	13	23	32	36	38	42	43	55	60	67	71	79	88	90	94	97	104	108	119	126
2	6	11	13	23	32	36	38	42	43	55	60	67	71	79	88	90	94	97	104	108	119	122
2	6	11	13	23	32	36	38	42	43	55	60	67	71	79	88	90	94	97	104	108	120	126
2	6	11	13	23	32	36	38	42	43	55	60	67	71	79	88	90	94	97	104	108	120	122
2	6	11	13	23	32	36	38	42	44	55	60	67	71	79	88	90	94	97	104	107	119	126
2	6	11	13	23	32	36	38	42	44	55	60	67	71	79	88	90	94	97	104	107	119	122
2	6	11	13	23	32	36	38	42	44	55	60	67	71	79	88	90	94	97	104	107	120	126
2	6	11	13	23	32	36	38	42	44	55	60	67	71	79	88	90	94	97	104	107	120	122
2	6	11	13	23	32	36	38	42	44	55	60	67	71	79	88	90	94	97	104	108	119	126
2	6	11	13	23	32	36	38	42	44	55	60	67	71	79	88	90	94	97	104	108	119	122
2	6	11	13	23	32	36	38	42	44	55	60	67	71	79	88	90	94	97	104	108	120	126
2	6	11	13	23	32	36	38	42	44	55	60	67	71	79	88	90	94	97	104	108	120	122
1	5	12	21	24	31	36	39	41	50	56	60	67	71	79	88	90	94	97	100	107	119	122
1	5	12	21	24	31	36	39	41	50	56	60	67	71	79	88	90	94	97	100	107	116	122
1	5	12	21	24	31	36	39	41	50	56	60	67	71	79	88	90	94	97	100	108	119	122
1	5	12	21	24	31	36	39	41	50	56	60	67	71	79	88	90	94	97	100	108	116	122
1	5	12	21	24	31	36	39	41	50	56	60	67	68	79	88	90	94	97	100	107	119	122
1	5	12	21	24	31	36	39	41	50	56	60	67	68	79	88	90	94	97	100	107	116	122
1	5	12	21	24	31	36	39	41	50	56	60	67	68	79	88	90	94	97	100	108	119	122
1	5	12	21	24	31	36	39	41	50	56	60	67	68	79	88	90	94	97	100	108	116	122
1	5	12	21	24	31	36	39	41	50	56	60	64	71	79	88	90	94	97	100	107	119	122
1	5	12	21	24	31	36	39	41	50	56	60	64	71	79	88	90	94	97	100	107	116	122
1	5	12	21	24	31	36	39	41	50	56	60	64	71	79	88	90	94	97	100	108	119	122
1	5	12	21	24	31	36	39	41	50	56	60	64	71	79	88	90	94	97	100	108	116	122
1	5	12	21	24	31	36	39	41	50	56	60	64	68	79	88	90	94	97	100	107	119	122
1	5	12	21	24	31	36	39	41	50	56	60	64	68	79	88	90	94	97	100	107	116	122
1	5	12	21	24	31	36	39	41	50	56	60	64	68	79	88	90	94	97	100	108	119	122
1	5	12	21	24	31	36	39	41	50	56	60	64	68	79	88	90	94	97	100	108	116	122
1	5	12	21	24	31	36	39	41	46	56	60	67	71	79	88	90	94	97	100	107	119	122
1	5	12	21	24	31	36	39	41	46	56	60	67	71	79	88	90	94	97	100	107	116	122
1	5	12	21	24	31	36	39	41	46	56	60	67	71	79	88	90	94	97	100	108	119	122
1	5	12	21	24	31	36	39	41	46	56	60	67	71	79	88	90	94	97	100	108	116	122
1	5	12	21	24	31	36	39	41	46	56	60	67	68	79	88	90	94	97	100	107	119	122
1	5	12	21	24	31	36	39	41	46	56	60	67	68	79	88	90	94	97	100	107	116	122
1	5	12	21	24	31	36	39	41	46	56	60	67	68	79	88	90	94	97	100	108	119	122
1	5	12	21	24	31	36	39	41	46	56	60	67	68	79	88	90	94	97	100	108	116	122
1	5	12	21	24	31	36	39	41	46	56	60	64	71	79	88	90	94	97	100	107	119	122
1	5	12	21	24	31	36	39	41	46	56	60	64	71	79	88	90	94	97	100	107	116	122
1	5	12	21	24	31	36	39	41	46	56	60	64	71	79	88	90	94	97	100	108	119	122
1	5	12	21	24	31	36	39	41	46	56	60	64	71	79	88	90	94	97	100	108	116	122
1	5	12	21	24	31	36	39	41	46	56	60	64	68	79	88	90	94	97	100	107	119	122
1	5	12	21	24	31	36	39	41	46	56	60	64	68	79	88	90	94	97	100	107	116	122
1	5	12	21	24	31	36	39	41	46	56	60	64	68	79	88	90	94	97	100	108	119	122
1	5	12	21	24	31	36	39	41	46	56	60	64	68	79	88	90	94	97	100	108	116	122
1	5	12	21	24	31	36	39	41	43	56	60	67	71	79	88	90	94	97	100	107	119	122
1	5	12	21	24	31	36	39	41	43	56	60	67	71	79	88	90	94	97	100	107	116	122
1	5	12	21	24	31	36	39	41	43	56	60	67	71	79	88	90	94	97	100	108	119	122
1	5	12	21	24	31	36	39	41	43	56	60	67	71	79	88	90	94	97	100	108	116	122
1	5	12	21	24	31	36	39	41	43	56	60	67	68	79	88	90	94	97	100	107	119	122
1	5	12	21	24	31	36	39	41	43	56	60	67	68	79	88	90	94	97	100	107	116	122
1	5	12	21	24	31	36	39	41	43	56	60	67	68	79	88	90	94	97	100	108	119	122
1	5	12	21	24	31	36	39	41	43	56	60	67	68	79	88	90	94	97	100	108	116	122
1	5	12	21	24	31	36	39	41	43	56	60	64	71	79	88	90	94	97	100	107	119	122
1	5	12	21	24	31	36	39	41	43	56	60	64	71	79	88	90	94	97	100	107	116	122
1	5	12	21	24	31	36	39	41	43	56	60	64	71	79	88	90	94	97	100	108	119	122
1	5	12	21	24	31	36	39	41	43	56	60	64	71	79	88	90	94	97	100	108	116	122
1	5	12	21	24	31	36	39	41	43	56	60	64	68	79	88	90	94	97	100	107	119	122
1	5	12	21	24	31	36	39	41	43	56	60	64	68	79	88	90	94	97	100	107	116	122
1	5	12	21	24	31	36	39	41	43	56	60	64	68	79	88	90	94	97	100	108	119	122
1	5	12	21	24	31	36	39	41	43	56	60	64	68	79	88	90	94	97	100	108	116	122
1	5	12	21	24	31	36	39	41	44	56	60	67	71	79	88	90	94	97	100	107	119	122
1	5	12	21	24	31	36	39	41	44	56	60	67	71	79	88	90	94	97	100	107	116	122
1	5	12	21	24	31	36	39	41	44	56	60	67	71	79	88	90	94	97	100	108	119	122
1	5	12	21	24	31	36	39	41	44	56	60	67	71	79	88	90	94	97	100	108	116	122
1	5	12	21	24	31	36	39	41	44	56	60	67	68	79	88	90	94	97	100	107	119	122
1	5	12	21	24	31	36	39	41	44	56	60	67	68	79	88	90	94	97	100	107	116	122
1	5	12	21	24	31	36	39	41	44	56	60	67	68	79	88	90	94	97	100	108	119	122
1	5	12	21	24	31	36	39	41	44	56	60	67	68	79	88	90	94	97	100	108	116	122
1	5	12	21	24	31	36	39	41	44	56	60	64	71	79	88	90	94	97	100	107	119	122
1	5	12	21	24	31	36	39	41	44	56	60	64	71	79	88	90	94	97	100	107	116	122
1	5	12	21	24	31	36	39	41	44	56	60	64	71	79	88	90	94	97	100	108	119	122
1	5	12	21	24	31	36	39	41	44	56	60	64	71	79	88	90	94	97	100	108	116	122
1	5	12	21	24	31	36	39	41	44	56	60	64	68	79	88	90	94	97	100	107	119	122
1	5	12	21	24	31	36	39	41	44	56	60	64	68	79	88	90	94	97	100	107	116	122
1	5	12	21	24	31	36	39	41	44	56	60	64	68	79	88	90	94	97	100	108	119	122
1	5	12	21	24	31	36	39	41	44	56	60	64	68	79	88	90	94	97	100	108	116	122
1	5	12	16	24	31	36	39	41	50	56	60	67	71	79	88	90	94	97	100	107	119	122
1	5	12	16	24	31	36	39	41	50	56	60	67	71	79	88	90	94	97	100	107	116	122
1	5	12	16	24	31	36	39	41	50	56	60	67	71	79	88	90	94	97	100	108	119	122
1	5	12	16	24	31	36	39	41	50	56	60	67	71	79	88	90	94	97	100	108	116	122
1	5	12	16	24	31	36	39	41	50	56	60	67	68	79	88	90	94	97	100	107	119	122
1	5	12	16	24	31	36	39	41	50	56	60	67	68	79	88	90	94	97	100	107	116	122
1	5	12	16	24	31	36	39	41	50	56	60	67	68	79	88	90	94	97	100	108	119	122
1	5	12	16	24	31	36	39	41	50	56	60	67	68	79	88	90	94	97	100	108	116	122
1	5	12	16	24	31	36	39	41	50	56	60	64	71	79	88	90	94	97	100	107	119	122
1	5	12	16	24	31	36	39	41	50	56	60	64	71	79	88	90	94	97	100	107	116	122
1	5	12	16	24	31	36	39	41	50	56	60	64	71	79	88	90	94	97	100	108	119	122
1	5	12	16	24	31	36	39	41	50	56	60	64	71	79	88	90	94	97	100	108	116	122
1	5	12	16	24	31	36	39	41	50	56	60	64	68	79	88	90	94	97	100	107	119	122
1	5	12	16	24	31	36	39	41	50	56	60	64	68	79	88	90	94	97	100	107	116	122
1	5	12	16	24	31	36	39	41	50	56	60	64	68	79	88	90	94	97	100	108	119	122
1	5	12	16	24	31	36	39	41	50	56	60	64	68	79	88	90	94	97	100	108	116	122
1	5	12	16	24	31	36	39	41	46	56	60	67	71	79	88	90	94	97	100	107	119	122
1	5	12	16	24	31	36	39	41	46	56	60	67	71	79	88	90	94	97	100	107	116	122
1	5	12	16	24	31	36	39	41	46	56	60	67	71	79	88	90	94	97	100	108	119	122
1	5	12	16	24	31	36	39	41	46	56	60	67	71	79	88	90	94	97	100	108	116	122
1	5	12	16	24	31	36	39	41	46	56	60	67	68	79	88	90	94	97	100	107	119	122
1	5	12	16	24	31	36	39	41	46	56	60	67	68	79	88	90	94	97	100	107	116	122
1	5	12	16	24	31	36	39	41	46	56	60	67	68	79	88	90	94	97	100	108	119	122
1	5	12	16	24	31	36	39	41	46	56	60	67	68	79	88	90	94	97	100	108	116	122
1	5	12	16	24	31	36	39	41	46	56	60	64	71	79	88	90	94	97	100	107	119	122
1	5	12	16	24	31	36	39	41	46	56	60	64	71	79	88	90	94	97	100	107	116	122
1	5	12	16	24	31	36	39	41	46	56	60	64	71	79	88	90	94	97	100	108	119	122
1	5	12	16	24	31	36	39	41	46	56	60	64	71	79	88	90	94	97	100	108	116	122
1	5	12	16	24	31	36	39	41	46	56	60	64	68	79	88	90	94	97	100	107	119	122
1	5	12	16	24	31	36	39	41	46	56	60	64	68	79	88	90	94	97	100	107	116	122
1	5	12	16	24	31	36	39	41	46	56	60	64	68	79	88	90	94	97	100	108	119	122
1	5	12	16	24	31	36	39	41	46	56	60	64	68	79	88	90	94	97	100	108	116	122
1	5	12	16	24	31	36	39	41	43	56	60	67	71	79	88	90	94	97	100	107	119	122
1	5	12	16	24	31	36	39	41	43	56	60	67	71	79	88	90	94	97	100	107	116	122
1	5	12	16	24	31	36	39	41	43	56	60	67	71	79	88	90	94	97	100	108	119	122
1	5	12	16	24	31	36	39	41	43	56	60	67	71	79	88	90	94	97	100	108	116	122
1	5	12	16	24	31	36	39	41	43	56	60	67	68	79	88	90	94	97	100	107	119	122
1	5	12	16	24	31	36	39	41	43	56	60	67	68	79	88	90	94	97	100	107	116	122
1	5	12	16	24	31	36	39	41	43	56	60	67	68	79	88	90	94	97	100	108	119	122
1	5	12	16	24	31	36	39	41	43	56	60	67	68	79	88	90	94	97	100	108	116	122
1	5	12	16	24	31	36	39	41	43	56	60	64	71	79	88	90	94	97	100	107	119	122
1	5	12	16	24	31	36	39	41	43	56	60	64	71	79	88	90	94	97	100	107	116	122
1	5	12	16	24	31	36	39	41	43	56	60	64	71	79	88	90	94	97	100	108	119	122
1	5	12	16	24	31	36	39	41	43	56	60	64	71	79	88	90	94	97	100	108	116	122
1	5	12	16	24	31	36	39	41	43	56	60	64	68	79	88	90	94	97	100	107	119	122
1	5	12	16	24	31	36	39	41	43	56	60	64	68	79	88	90	94	97	100	107	116	122
1	5	12	16	24	31	36	39	41	43	56	60	64	68	79	88	90	94	97	100	108	119	122
1	5	12	16	24	31	36	39	41	43	56	60	64	68	79	88	90	94	97	100	108	116	122
1	5	12	16	24	31	36	39	41	44	56	60	67	71	79	88	90	94	97	100	107	119	122
1	5	12	16	24	31	36	39	41	44	56	60	67	71	79	88	90	94	97	100	107	116	122
1	5	12	16	24	31	36	39	41	44	56	60	67	71	79	88	90	94	97	100	108	119	122
1	5	12	16	24	31	36	39	41	44	56	60	67	71	79	88	90	94	97	100	108	116	122
1	5	12	16	24	31	36	39	41	44	56	60	67	68	79	88	90	94	97	100	107	119	122
1	5	12	16	24	31	36	39	41	44	56	60	67	68	79	88	90	94	97	100	107	116	122
1	5	12	16	24	31	36	39	41	44	56	60	67	68	79	88	90	94	97	100	108	119	122
1	5	12	16	24	31	36	39	41	44	56	60	67	68	79	88	90	94	97	100	108	116	122
1	5	12	16	24	31	36	39	41	44	56	60	64	71	79	88	90	94	97	100	107	119	122
1	5	12	16	24	31	36	39	41	44	56	60	64	71	79	88	90	94	97	100	107	116	122
1	5	12	16	24	31	36	39	41	44	56	60	64	71	79	88	90	94	97	100	108	119	122
1	5	12	16	24	31	36	39	41	44	56	60	64	71	79	88	90	94	97	100	108	116	122
1	5	12	16	24	31	36	39	41	44	56	60	64	68	79	88	90	94	97	100	107	119	122
1	5	12	16	24	31	36	39	41	44	56	60	64	68	79	88	90	94	97	100	107	116	122
1	5	12	16	24	31	36	39	41	44	56	60	64	68	79	88	90	94	97	100	108	119	122
1	5	12	16	24	31	36	39	41	44	56	60	64	68	79	88	90	94	97	100	108	116	122
1	5	12	16	24	31	36	39	41	50	56	60	67	71	79	88	90	94	97	100	107	119	122
1	5	12	16	24	31	36	39	41	50	56	60	67	71	79	88	90	94	97	100	107	116	122
1	5	12	16	24	31	36	39	41	50	56	60	67	71	79	88	90	94	97	100	108	119	122
1	5	12	16	24	31	36	39	41	50	56	60	67	71	79	88	90	94	97	100	108	116	122
1	5	12	16	24	31	36	39	41	50	56	60	67	68	79	88	90	94	97	100	107	119	122
1	5	12	16	24	31	36	39	41	50	56	60	67	68	79	88	90	94	97	100	107	116	122
1	5	12	16	24	31	36	39	41	50	56	60	67	68	79	88	90	94	97	100	108	119	122
1	5	12	16	24	31	36	39	41	50	56	60	67	68	79	88	90	94	97	100	108	116	122
1	5	12	16	24	31	36	39	41	50	56	60	64	71	79	88	90	94	97	100	107	119	122
1	5	12	16	24	31	36	39	41	50	56	60	64	71	79	88	90	94	97	100	107	116	122
1	5	12	16	24	31	36	39	41	50	56	60	64	71	79	88	90	94	97	100	108	119	122
1	5	12	16	24	31	36	39	41	50	56	60	64	71	79	88	90	94	97	100	108	116	122
1	5	12	16	24	31	36	39	41	50	56	60	64	68	79	88	90	94	97	100	107	119	122
1	5	12	16	24	31	36	39	41	50	56	60	64	68	79	88	90	94	97	100	107	116	122
1	5	12	16	24	31	36	39	41	50	56	60	64	68	79	88	90	94	97	100	108	119	122
1	5	12	16	24	31	36	39	41	50	56	60	64	68	79	88	90	94	97	100	108	116	122
1	5	12	16	24	31	36	39	41	46	56	60	67	71	79	88	90	94	97	100	107	119	122
1	5	12	16	24	31	36	39	41	46	56	60	67	71	79	88	90	94	97	100	107	116	122
1	5	12	16	24	31	36	39	41	46	56	60	67	71	79	88	90	94	97	100	108	119	122
1	5	12	16	24	31	36	39	41	46	56	60	67	71	79	88	90	94	97	100	108	116	122
1	5	12	16	24	31	36	39	41	46	56	60	67	68	79	88	90	94	97	100	107	119	122
1	5	12	16	24	31	36	39	41	46	56	60	67	68	79	88	90	94	97	100	107	116	122
1	5	12	16	24	31	36	39	41	46	56	60	67	68	79	88	90	94	97	100	108	119	122
1	5	12	16	24	31	36	39	41	46	56	60	67	68	79	88	90	94	97	100	108	116	122
1	5	12	16	24	31	36	39	41	46	56	60	64	71	79	88	90	94	97	100	107	119	122
1	5	12	16	24	31	36	39	41	46	56	60	64	71	79	88	90	94	97	100	107	116	122
1	5	12	16	24	31	36	39	41	46	56	60	64	71	79	88	90	94	97	100	108	119	122
1	5	12	16	24	31	36	39	41	46	56	60	64	71	79	88	90	94	97	100	108	116	122
1	5	12	16	24	31	36	39	41	46	56	60	64	68	79	88	90	94	97	100	107	119	122
1	5	12	16	24	31	36	39	41	46	56	60	64	68	79	88	90	94	97	100	107	116	122
1	5	12	16	24	31	36	39	41	46	56	60	64	68	79	88	90	94	97	100	108	119	122
1	5	12	16	24	31	36	39	41	46	56	60	64	68	79	88	90	94	97	100	108	116	122
1	5	12	16	24	31	36	39	41	43	56	60	67	71	79	88	90	94	97	100	107	119	122
1	5	12	16	24	31	36	39	41	43	56	60	67	71	79	88	90	94	97	100	107	116	122
1	5	12	16	24	31	36	39	41	43	56	60	67	71	79	88	90	94	97	100	108	119	122
1	5	12	16	24	31	36	39	41	43	56	60	67	71	79	88	90	94	97	100	108	116	122
1	5	12	16	24	31	36	39	41	43	56	60	67	68	79	88	90	94	97	100	107	119	122
1	5	12	16	24	31	36	39	41	43	56	60	67	68	79	88	90	94	97	100	107	116	122
1	5	12	16	24	31	36	39	41	43	56	60	67	68	79	88	90	94	97	100	108	119	122
1	5	12	16	24	31	36	39	41	43	56	60	67	68	79	88	90	94	97	100	108	116	122
1	5	12	16	24	31	36	39	41	43	56	60	64	71	79	88	90	94	97	100	107	119	122
1	5	12	16	24	31	36	39	41	43	56	60	64	71	79	88	90	94	97	100	107	116	122
1	5	12	16	24	31	36	39	41	43	56	60	64	71	79	88	90	94	97	100	108	119	122
1	5	12	16	24	31	36	39	41	43	56	60	64	71	79	88	90	94	97	100	108	116	122
1	5	12	16	24	31	36	39	41	43	56	60	64	68	79	88	90	94	97	100	107	119	122
1	5	12	16	24	31	36	39	41	43	56	60	64	68	79	88	90	94	97	100	107	116	122
1	5	12	16	24	31	36	39	41	43	56	60	64	68	79	88	90	94	97	100	108	119	122
1	5	12	16	24	31	36	39	41	43	56	60	64	68	79	88	90	94	97	100	108	116	122
1	5	12	16	24	31	36	39	41	44	56	60	67	71	79	88	90	94	97	100	107	119	122
1	5	12	16	24	31	36	39	41	44	56	60	67	71	79	88	90	94	97	100	107	116	122
1	5	12	16	24	31	36	39	41	44	56	60	67	71	79	88	90	94	97	100	108	119	122
1	5	12	16	24	31	36	39	41	44	56	60	67	71	79	88	90	94	97	100	108	116	122
1	5	12	16	24	31	36	39	41	44	56	60	67	68	79	88	90	94	97	100	107	119	122
1	5	12	16	24	31	36	39	41	44	56	60	67	68	79	88	90	94	97	100	107	116	122
1	5	12	16	24	31	36	39	41	44	56	60	67	68	79	88	90	94	97	100	108	119	122
1	5	12	16	24	31	36	39	41	44	56	60	67	68	79	88	90	94	97	100	108	116	122
1	5	12	16	24	31	36	39	41	44	56	60	64	71	79	88	90	94	97	100	107	119	122
1	5	12	16	24	31	36	39	41	44	56	60	64	71	79	88	90	94	97	100	107	116	122
1	5	12	16	24	31	36	39	41	44	56	60	64	71	79	88	90	94	97	100	108	119	122
1	5	12	16	24	31	36	39	41	44	56	60	64	71	79	88	90	94	97	100	108	116	122
1	5	12	16	24	31	36	39	41	44	56	60	64	68	79	88	90	94	97	100	107	119	122
1	5	12	16	24	31	36	39	41	44	56	60	64	68	79	88	90	94	97	100	107	116	122
1	5	12	16	24	31	36	39	41	44	56	60	64	68	79	88	90	94	97	100	108	119	122
1	5	12	16	24	31	36	39	41	44	56	60	64	68	79	88	90	94	97	100	108	116	122
1	5	12	13	24	31	36	39	41	50	56	60	67	71	79	88	90	94	97	100	107	119	122
1	5	12	13	24	31	36	39	41	50	56	60	67	71	79	88	90	94	97	100	107	116	122
1	5	12	13	24	31	36	39	41	50	56	60	67	71	79	88	90	94	97	100	108	119	122
1	5	12	13	24	31	36	39	41	50	56	60	67	71	79	88	90	94	97	100	108	116	122
1	5	12	13	24	31	36	39	41	50	56	60	67	68	79	88	90	94	97	100	107	119	122
1	5	12	13	24	31	36	39	41	50	56	60	67	68	79	88	90	94	97	100	107	116	122
1	5	12	13	24	31	36	39	41	50	56	60	67	68	79	88	90	94	97	100	108	119	122
1	5	12	13	24	31	36	39	41	50	56	60	67	68	79	88	90	94	97	100	108	116	122
1	5	12	13	24	31	36	39	41	50	56	60	64	71	79	88	90	94	97	100	107	119	122
1	5	12	13	24	31	36	39	41	50	56	60	64	71	79	88	90	94	97	100	107	116	122
1	5	12	13	24	31	36	39	41	50	56	60	64	71	79	88	90	94	97	100	108	119	122
1	5	12	13	24	31	36	39	41	50	56	60	64	71	79	88	90	94	97	100	108	116	122
1	5	12	13	24	31	36	39	41	50	56	60	64	68	79	88	90	94	97	100	107	119	122
1	5	12	13	24	31	36	39	41	50	56	60	64	68	79	88	90	94	97	100	107	116	122
1	5	12	13	24	31	36	39	41	50	56	60	64	68	79	88	90	94	97	100	108	119	122
1	5	12	13	24	31	36	39	41	50	56	60	64	68	79	88	90	94	97	100	108	116	122
1	5	12	13	24	31	36	39	41	46	56	60	67	71	79	88	90	94	97	100	107	119	122
1	5	12	13	24	31	36	39	41	46	56	60	67	71	79	88	90	94	97	100	107	116	122
1	5	12	13	24	31	36	39	41	46	56	60	67	71	79	88	90	94	97	100	108	119	122
1	5	12	13	24	31	36	39	41	46	56	60	67	71	79	88	90	94	97	100	108	116	122
1	5	12	13	24	31	36	39	41	46	56	60	67	68	79	88	90	94	97	100	107	119	122
1	5	12	13	24	31	36	39	41	46	56	60	67	68	79	88	90	94	97	100	107	116	122
1	5	12	13	24	31	36	39	41	46	56	60	67	68	79	88	90	94	97	100	108	119	122
1	5	12	13	24	31	36	39	41	46	56	60	67	68	79	88	90	94	97	100	108	116	122
1	5	12	13	24	31	36	39	41	46	56	60	64	71	79	88	90	94	97	100	107	119	122
1	5	12	13	24	31	36	39	41	46	56	60	64	71	79	88	90	94	97	100	107	116	122
1	5	12	13	24	31	36	39	41	46	56	60	64	71	79	88	90	94	97	100	108	119	122
1	5	12	13	24	31	36	39	41	46	56	60	64	71	79	88	90	94	97	100	108	116	122
1	5	12	13	24	31	36	39	41	46	56	60	64	68	79	88	90	94	97	100	107	119	122
1	5	12	13	24	31	36	39	41	46	56	60	64	68	79	88	90	94	97	100	107	116	122
1	5	12	13	24	31	36	39	41	46	56	60	64	68	79	88	90	94	97	100	108	119	122
1	5	12	13	24	31	36	39	41	46	56	60	64	68	79	88	90	94	97	100	108	116	122
1	5	12	13	24	31	36	39	41	43	56	60	67	71	79	88	90	94	97	100	107	119	122
1	5	12	13	24	31	36	39	41	43	56	60	67	71	79	88	90	94	97	100	107	116	122
1	5	12	13	24	31	36	39	41	43	56	60	67	71	79	88	90	94	97	100	108	119	122
1	5	12	13	24	31	36	39	41	43	56	60	67	71	79	88	90	94	97	100	108	116	122
1	5	12	13	24	31	36	39	41	43	56	60	67	68	79	88	90	94	97	100	107	119	122
1	5	12	13	24	31	36	39	41	43	56	60	67	68	79	88	90	94	97	100	107	116	122
1	5	12	13	24	31	36	39	41	43	56	60	67	68	79	88	90	94	97	100	108	119	122
1	5	12	13	24	31	36	39	41	43	56	60	67	68	79	88	90	94	97	100	108	116	122
1	5	12	13	24	31	36	39	41	43	56	60	64	71	79	88	90	94	97	100	107	119	122
1	5	12	13	24	31	36	39	41	43	56	60	64	71	79	88	90	94	97	100	107	116	122
1	5	12	13	24	31	36	39	41	43	56	60	64	71	79	88	90	94	97	100	108	119	122
1	5	12	13	24	31	36	39	41	43	56	60	64	71	79	88	90	94	97	100	108	116	122
1	5	12	13	24	31	36	39	41	43	56	60	64	68	79	88	90	94	97	100	107	119	122
1	5	12	13	24	31	36	39	41	43	56	60	64	68	79	88	90	94	97	100	107	116	122
1	5	12	13	24	31	36	39	41	43	56	60	64	68	79	88	90	94	97	100	108	119	122
1	5	12	13	24	31	36	39	41	43	56	60	64	68	79	88	90	94	97	100	108	116	122
1	5	12	13	24	31	36	39	41	44	56	60	67	71	79	88	90	94	97	100	107	119	122
1	5	12	13	24	31	36	39	41	44	56	60	67	71	79	88	90	94	97	100	107	116	122
1	5	12	13	24	31	36	39	41	44	56	60	67	71	79	88	90	94	97	100	108	119	122
1	5	12	13	24	31	36	39	41	44	56	60	67	71	79	88	90	94	97	100	108	116	122
1	5	12	13	24	31	36	39	41	44	56	60	67	68	79	88	90	94	97	100	107	119	122
1	5	12	13	24	31	36	39	41	44	56	60	67	68	79	88	90	94	97	100	107	116	122
1	5	12	13	24	31	36	39	41	44	56	60	67	68	79	88	90	94	97	100	108	119	122
1	5	12	13	24	31	36	39	41	44	56	60	67	68	79	88	90	94	97	100	108	116	122
1	5	12	13	24	31	36	39	41	44	56	60	64	71	79	88	90	94	97	100	107	119	122
1	5	12	13	24	31	36	39	41	44	56	60	64	71	79	88	90	94	97	100	107	116	122
1	5	12	13	24	31	36	39	41	44	56	60	64	71	79	88	90	94	97	100	108	119	122
1	5	12	13	24	31	36	39	41	44	56	60	64	71	79	88	90	94	97	100	108	116	122
1	5	12	13	24	31	36	39	41	44	56	60	64	68	79	88	90	94	97	100	107	119	122
1	5	12	13	24	31	36	39	41	44	56	60	64	68	79	88	90	94	97	100	107	116	122
1	5	12	13	24	31	36	39	41	44	56	60	64	68	79	88	90	94	97	100	108	119	122
1	5	12	13	24	31	36	39	41	44	56	60	64	68	79	88	90	94	97	100	108	116	122
1	5	9	21	24	31	36	39	41	50	56	60	67	71	79	88	90	94	97	100	107	119	122
1	5	9	21	24	31	36	39	41	50	56	60	67	71	79	88	90	94	97	100	107	116	122
1	5	9	21	24	31	36	39	41	50	56	60	67	71	79	88	90	94	97	100	108	119	122
1	5	9	21	24	31	36	39	41	50	56	60	67	71	79	88	90	94	97	100	108	116	122
1	5	9	21	24	31	36	39	41	50	56	60	67	68	79	88	90	94	97	100	107	119	122
1	5	9	21	24	31	36	39	41	50	56	60	67	68	79	88	90	94	97	100	107	116	122
1	5	9	21	24	31	36	39	41	50	56	60	67	68	79	88	90	94	97	100	108	119	122
1	5	9	21	24	31	36	39	41	50	56	60	67	68	79	88	90	94	97	100	108	116	122
1	5	9	21	24	31	36	39	41	50	56	60	64	71	79	88	90	94	97	100	107	119	122
1	5	9	21	24	31	36	39	41	50	56	60	64	71	79	88	90	94	97	100	107	116	122
1	5	9	21	24	31	36	39	41	50	56	60	64	71	79	88	90	94	97	100	108	119	122
1	5	9	21	24	31	36	39	41	50	56	60	64	71	79	88	90	94	97	100	108	116	122
1	5	9	21	24	31	36	39	41	50	56	60	64	68	79	88	90	94	97	100	107	119	122
1	5	9	21	24	31	36	39	41	50	56	60	64	68	79	88	90	94	97	100	107	116	122
1	5	9	21	24	31	36	39	41	50	56	60	64	68	79	88	90	94	97	100	108	119	122
1	5	9	21	24	31	36	39	41	50	56	60	64	68	79	88	90	94	97	100	108	116	122
1	5	9	21	24	31	36	39	41	46	56	60	67	71	79	88	90	94	97	100	107	119	122
1	5	9	21	24	31	36	39	41	46	56	60	67	71	79	88	90	94	97	100	107	116	122
1	5	9	21	24	31	36	39	41	46	56	60	67	71	79	88	90	94	97	100	108	119	122
1	5	9	21	24	31	36	39	41	46	56	60	67	71	79	88	90	94	97	100	108	116	122
1	5	9	21	24	31	36	39	41	46	56	60	67	68	79	88	90	94	97	100	107	119	122
1	5	9	21	24	31	36	39	41	46	56	60	67	68	79	88	90	94	97	100	107	116	122
1	5	9	21	24	31	36	39	41	46	56	60	67	68	79	88	90	94	97	100	108	119	122
1	5	9	21	24	31	36	39	41	46	56	60	67	68	79	88	90	94	97	100	108	116	122
1	5	9	21	24	31	36	39	41	46	56	60	64	71	79	88	90	94	97	100	107	119	122
1	5	9	21	24	31	36	39	41	46	56	60	64	71	79	88	90	94	97	100	107	116	122
1	5	9	21	24	31	36	39	41	46	56	60	64	71	79	88	90	94	97	100	108	119	122
1	5	9	21	24	31	36	39	41	46	56	60	64	71	79	88	90	94	97	100	108	116	122
1	5	9	21	24	31	36	39	41	46	56	60	64	68	79	88	90	94	97	100	107	119	122
1	5	9	21	24	31	36	39	41	46	56	60	64	68	79	88	90	94	97	100	107	116	122
1	5	9	21	24	31	36	39	41	46	56	60	64	68	79	88	90	94	97	100	108	119	122
1	5	9	21	24	31	36	39	41	46	56	60	64	68	79	88	90	94	97	100	108	116	122
1	5	9	21	24	31	36	39	41	43	56	60	67	71	79	88	90	94	97	100	107	119	122
1	5	9	21	24	31	36	39	41	43	56	60	67	71	79	88	90	94	97	100	107	116	122
1	5	9	21	24	31	36	39	41	43	56	60	67	71	79	88	90	94	97	100	108	119	122
1	5	9	21	24	31	36	39	41	43	56	60	67	71	79	88	90	94	97	100	108	116	122
1	5	9	21	24	31	36	39	41	43	56	60	67	68	79	88	90	94	97	100	107	119	122
1	5	9	21	24	31	36	39	41	43	56	60	67	68	79	88	90	94	97	100	107	116	122
1	5	9	21	24	31	36	39	41	43	56	60	67	68	79	88	90	94	97	100	108	119	122
1	5	9	21	24	31	36	39	41	43	56	60	67	68	79	88	90	94	97	100	108	116	122
1	5	9	21	24	31	36	39	41	43	56	60	64	71	79	88	90	94	97	100	107	119	122
1	5	9	21	24	31	36	39	41	43	56	60	64	71	79	88	90	94	97	100	107	116	122
1	5	9	21	24	31	36	39	41	43	56	60	64	71	79	88	90	94	97	100	108	119	122
1	5	9	21	24	31	36	39	41	43	56	60	64	71	79	88	90	94	97	100	108	116	122
1	5	9	21	24	31	36	39	41	43	56	60	64	68	79	88	90	94	97	100	107	119	122
1	5	9	21	24	31	36	39	41	43	56	60	64	68	79	88	90	94	97	100	107	116	122
1	5	9	21	24	31	36	39	41	43	56	60	64	68	79	88	90	94	97	100	108	119	122
1	5	9	21	24	31	36	39	41	43	56	60	64	68	79	88	90	94	97	100	108	116	122
1	5	9	21	24	31	36	39	41	44	56	60	67	71	79	88	90	94	97	100	107	119	122
1	5	9	21	24	31	36	39	41	44	56	60	67	71	79	88	90	94	97	100	107	116	122
1	5	9	21	24	31	36	39	41	44	56	60	67	71	79	88	90	94	97	100	108	119	122
1	5	9	21	24	31	36	39	41	44	56	60	67	71	79	88	90	94	97	100	108	116	122
1	5	9	21	24	31	36	39	41	44	56	60	67	68	79	88	90	94	97	100	107	119	122
1	5	9	21	24	31	36	39	41	44	56	60	67	68	79	88	90	94	97	100	107	116	122
1	5	9	21	24	31	36	39	41	44	56	60	67	68	79	88	90	94	97	100	108	119	122
1	5	9	21	24	31	36	39	41	44	56	60	67	68	79	88	90	94	97	100	108	116	122
1	5	9	21	24	31	36	39	41	44	56	60	64	71	79	88	90	94	97	100	107	119	122
1	5	9	21	24	31	36	39	41	44	56	60	64	71	79	88	90	94	97	100	107	116	122
1	5	9	21	24	31	36	39	41	44	56	60	64	71	79	88	90	94	97	100	108	119	122
1	5	9	21	24	31	36	39	41	44	56	60	64	71	79	88	90	94	97	100	108	116	122
1	5	9	21	24	31	36	39	41	44	56	60	64	68	79	88	90	94	97	100	107	119	122
1	5	9	21	24	31	36	39	41	44	56	60	64	68	79	88	90	94	97	100	107	116	122
1	5	9	21	24	31	36	39	41	44	56	60	64	68	79	88	90	94	97	100	108	119	122
1	5	9	21	24	31	36	39	41	44	56	60	64	68	79	88	90	94	97	100	108	116	122
1	5	9	16	24	31	36	39	41	50	56	60	67	71	79	88	90	94	97	100	107	119	122
1	5	9	16	24	31	36	39	41	50	56	60	67	71	79	88	90	94	97	100	107	116	122
1	5	9	16	24	31	36	39	41	50	56	60	67	71	79	88	90	94	97	100	108	119	122
1	5	9	16	24	31	36	39	41	50	56	60	67	71	79	88	90	94	97	100	108	116	122
1	5	9	16	24	31	36	39	41	50	56	60	67	68	79	88	90	94	97	100	107	119	122
1	5	9	16	24	31	36	39	41	50	56	60	67	68	79	88	90	94	97	100	107	116	122
1	5	9	16	24	31	36	39	41	50	56	60	67	68	79	88	90	94	97	100	108	119	122
1	5	9	16	24	31	36	39	41	50	56	60	67	68	79	88	90	94	97	100	108	116	122
1	5	9	16	24	31	36	39	41	50	56	60	64	71	79	88	90	94	97	100	107	119	122
1	5	9	16	24	31	36	39	41	50	56	60	64	71	79	88	90	94	97	100	107	116	122
1	5	9	16	24	31	36	39	41	50	56	60	64	71	79	88	90	94	97	100	108	119	122
1	5	9	16	24	31	36	39	41	50	56	60	64	71	79	88	90	94	97	100	108	116	122
1	5	9	16	24	31	36	39	41	50	56	60	64	68	79	88	90	94	97	100	107	119	122
1	5	9	16	24	31	36	39	41	50	56	60	64	68	79	88	90	94	97	100	107	116	122
1	5	9	16	24	31	36	39	41	50	56	60	64	68	79	88	90	94	97	100	108	119	122
1	5	9	16	24	31	36	39	41	50	56	60	64	68	79	88	90	94	97	100	108	116	122
1	5	9	16	24	31	36	39	41	46	56	60	67	71	79	88	90	94	97	100	107	119	122
1	5	9	16	24	31	36	39	41	46	56	60	67	71	79	88	90	94	97	100	107	116	122
1	5	9	16	24	31	36	39	41	46	56	60	67	71	79	88	90	94	97	100	108	119	122
1	5	9	16	24	31	36	39	41	46	56	60	67	71	79	88	90	94	97	100	108	116	122
1	5	9	16	24	31	36	39	41	46	56	60	67	68	79	88	90	94	97	100	107	119	122
1	5	9	16	24	31	36	39	41	46	56	60	67	68	79	88	90	94	97	100	107	116	122
1	5	9	16	24	31	36	39	41	46	56	60	67	68	79	88	90	94	97	100	108	119	122
1	5	9	16	24	31	36	39	41	46	56	60	67	68	79	88	90	94	97	100	108	116	122
1	5	9	16	24	31	36	39	41	46	56	60	64	71	79	88	90	94	97	100	107	119	122
1	5	9	16	24	31	36	39	41	46	56	60	64	71	79	88	90	94	97	100	107	116	122
1	5	9	16	24	31	36	39	41	46	56	60	64	71	79	88	90	94	97	100	108	119	122
1	5	9	16	24	31	36	39	41	46	56	60	64	71	79	88	90	94	97	100	108	116	122
1	5	9	16	24	31	36	39	41	46	56	60	64	68	79	88	90	94	97	100	107	119	122
1	5	9	16	24	31	36	39	41	46	56	60	64	68	79	88	90	94	97	100	107	116	122
1	5	9	16	24	31	36	39	41	46	56	60	64	68	79	88	90	94	97	100	108	119	122
1	5	9	16	24	31	36	39	41	46	56	60	64	68	79	88	90	94	97	100	108	116	122
1	5	9	16	24	31	36	39	41	43	56	60	67	71	79	88	90	94	97	100	107	119	122
1	5	9	16	24	31	36	39	41	43	56	60	67	71	79	88	90	94	97	100	107	116	122
1	5	9	16	24	31	36	39	41	43	56	60	67	71	79	88	90	94	97	100	108	119	122
1	5	9	16	24	31	36	39	41	43	56	60	67	71	79	88	90	94	97	100	108	116	122
1	5	9	16	24	31	36	39	41	43	56	60	67	68	79	88	90	94	97	100	107	119	122
1	5	9	16	24	31	36	39	41	43	56	60	67	68	79	88	90	94	97	100	107	116	122
1	5	9	16	24	31	36	39	41	43	56	60	67	68	79	88	90	94	97	100	108	119	122
1	5	9	16	24	31	36	39	41	43	56	60	67	68	79	88	90	94	97	100	108	116	122
1	5	9	16	24	31	36	39	41	43	56	60	64	71	79	88	90	94	97	100	107	119	122
1	5	9	16	24	31	36	39	41	43	56	60	64	71	79	88	90	94	97	100	107	116	122
1	5	9	16	24	31	36	39	41	43	56	60	64	71	79	88	90	94	97	100	108	119	122
1	5	9	16	24	31	36	39	41	43	56	60	64	71	79	88	90	94	97	100	108	116	122
1	5	9	16	24	31	36	39	41	43	56	60	64	68	79	88	90	94	97	100	107	119	122
1	5	9	16	24	31	36	39	41	43	56	60	64	68	79	88	90	94	97	100	107	116	122
1	5	9	16	24	31	36	39	41	43	56	60	64	68	79	88	90	94	97	100	108	119	122
1	5	9	16	24	31	36	39	41	43	56	60	64	68	79	88	90	94	97	100	108	116	122
1	5	9	16	24	31	36	39	41	44	56	60	67	71	79	88	90	94	97	100	107	119	122
1	5	9	16	24	31	36	39	41	44	56	60	67	71	79	88	90	94	97	100	107	116	122
1	5	9	16	24	31	36	39	41	44	56	60	67	71	79	88	90	94	97	100	108	119	122
1	5	9	16	24	31	36	39	41	44	56	60	67	71	79	88	90	94	97	100	108	116	122
1	5	9	16	24	31	36	39	41	44	56	60	67	68	79	88	90	94	97	100	107	119	122
1	5	9	16	24	31	36	39	41	44	56	60	67	68	79	88	90	94	97	100	107	116	122
1	5	9	16	24	31	36	39	41	44	56	60	67	68	79	88	90	94	97	100	108	119	122
1	5	9	16	24	31	36	39	41	44	56	60	67	68	79	88	90	94	97	100	108	116	122
1	5	9	16	24	31	36	39	41	44	56	60	64	71	79	88	90	94	97	100	107	119	122
1	5	9	16	24	31	36	39	41	44	56	60	64	71	79	88	90	94	97	100	107	116	122
1	5	9	16	24	31	36	39	41	44	56	60	64	71	79	88	90	94	97	100	108	119	122
1	5	9	16	24	31	36	39	41	44	56	60	64	71	79	88	90	94	97	100	108	116	122
1	5	9	16	24	31	36	39	41	44	56	60	64	68	79	88	90	94	97	100	107	119	122
1	5	9	16	24	31	36	39	41	44	56	60	64	68	79	88	90	94	97	100	107	116	122
1	5	9	16	24	31	36	39	41	44	56	60	64	68	79	88	90	94	97	100	108	119	122
1	5	9	16	24	31	36	39	41	44	56	60	64	68	79	88	90	94	97	100	108	116	122
1	5	9	16	24	31	36	39	41	50	56	60	67	71	79	88	90	94	97	100	107	119	122
1	5	9	16	24	31	36	39	41	50	56	60	67	71	79	88	90	94	97	100	107	116	122
1	5	9	16	24	31	36	39	41	50	56	60	67	71	79	88	90	94	97	100	108	119	122
1	5	9	16	24	31	36	39	41	50	56	60	67	71	79	88	90	94	97	100	108	116	122
1	5	9	16	24	31	36	39	41	50	56	60	67	68	79	88	90	94	97	100	107	119	122
1	5	9	16	24	31	36	39	41	50	56	60	67	68	79	88	90	94	97	100	107	116	122
1	5	9	16	24	31	36	39	41	50	56	60	67	68	79	88	90	94	97	100	108	119	122
1	5	9	16	24	31	36	39	41	50	56	60	67	68	79	88	90	94	97	100	108	116	122
1	5	9	16	24	31	36	39	41	50	56	60	64	71	79	88	90	94	97	100	107	119	122
1	5	9	16	24	31	36	39	41	50	56	60	64	71	79	88	90	94	97	100	107	116	122
1	5	9	16	24	31	36	39	41	50	56	60	64	71	79	88	90	94	97	100	108	119	122
1	5	9	16	24	31	36	39	41	50	56	60	64	71	79	88	90	94	97	100	108	116	122
1	5	9	16	24	31	36	39	41	50	56	60	64	68	79	88	90	94	97	100	107	119	122
1	5	9	16	24	31	36	39	41	50	56	60	64	68	79	88	90	94	97	100	107	116	122
1	5	9	16	24	31	36	39	41	50	56	60	64	68	79	88	90	94	97	100	108	119	122
1	5	9	16	24	31	36	39	41	50	56	60	64	68	79	88	90	94	97	100	108	116	122
1	5	9	16	24	31	36	39	41	46	56	60	67	71	79	88	90	94	97	100	107	119	122
1	5	9	16	24	31	36	39	41	46	56	60	67	71	79	88	90	94	97	100	107	116	122
1	5	9	16	24	31	36	39	41	46	56	60	67	71	79	88	90	94	97	100	108	119	122
1	5	9	16	24	31	36	39	41	46	56	60	67	71	79	88	90	94	97	100	108	116	122
1	5	9	16	24	31	36	39	41	46	56	60	67	68	79	88	90	94	97	100	107	119	122
1	5	9	16	24	31	36	39	41	46	56	60	67	68	79	88	90	94	97	100	107	116	122
1	5	9	16	24	31	36	39	41	46	56	60	67	68	79	88	90	94	97	100	108	119	122
1	5	9	16	24	31	36	39	41	46	56	60	67	68	79	88	90	94	97	100	108	116	122
1	5	9	16	24	31	36	39	41	46	56	60	64	71	79	88	90	94	97	100	107	119	122
1	5	9	16	24	31	36	39	41	46	56	60	64	71	79	88	90	94	97	100	107	116	122
1	5	9	16	24	31	36	39	41	46	56	60	64	71	79	88	90	94	97	100	108	119	122
1	5	9	16	24	31	36	39	41	46	56	60	64	71	79	88	90	94	97	100	108	116	122
1	5	9	16	24	31	36	39	41	46	56	60	64	68	79	88	90	94	97	100	107	119	122
1	5	9	16	24	31	36	39	41	46	56	60	64	68	79	88	90	94	97	100	107	116	122
1	5	9	16	24	31	36	39	41	46	56	60	64	68	79	88	90	94	97	100	108	119	122
1	5	9	16	24	31	36	39	41	46	56	60	64	68	79	88	90	94	97	100	108	116	122
1	5	9	16	24	31	36	39	41	43	56	60	67	71	79	88	90	94	97	100	107	119	122
1	5	9	16	24	31	36	39	41	43	56	60	67	71	79	88	90	94	97	100	107	116	122
1	5	9	16	24	31	36	39	41	43	56	60	67	71	79	88	90	94	97	100	108	119	122
1	5	9	16	24	31	36	39	41	43	56	60	67	71	79	88	90	94	97	100	108	116	122
1	5	9	16	24	31	36	39	41	43	56	60	67	68	79	88	90	94	97	100	107	119	122
1	5	9	16	24	31	36	39	41	43	56	60	67	68	79	88	90	94	97	100	107	116	122
1	5	9	16	24	31	36	39	41	43	56	60	67	68	79	88	90	94	97	100	108	119	122
1	5	9	16	24	31	36	39	41	43	56	60	67	68	79	88	90	94	97	100	108	116	122
1	5	9	16	24	31	36	39	41	43	56	60	64	71	79	88	90	94	97	100	107	119	122
1	5	9	16	24	31	36	39	41	43	56	60	64	71	79	88	90	94	97	100	107	116	122
1	5	9	16	24	31	36	39	41	43	56	60	64	71	79	88	90	94	97	100	108	119	122
1	5	9	16	24	31	36	39	41	43	56	60	64	71	79	88	90	94	97	100	108	116	122
1	5	9	16	24	31	36	39	41	43	56	60	64	68	79	88	90	94	97	100	107	119	122
1	5	9	16	24	31	36	39	41	43	56	60	64	68	79	88	90	94	97	100	107	116	122
1	5	9	16	24	31	36	39	41	43	56	60	64	68	79	88	90	94	97	100	108	119	122
1	5	9	16	24	31	36	39	41	43	56	60	64	68	79	88	90	94	97	100	108	116	122
1	5	9	16	24	31	36	39	41	44	56	60	67	71	79	88	90	94	97	100	107	119	122
1	5	9	16	24	31	36	39	41	44	56	60	67	71	79	88	90	94	97	100	107	116	122
1	5	9	16	24	31	36	39	41	44	56	60	67	71	79	88	90	94	97	100	108	119	122
1	5	9	16	24	31	36	39	41	44	56	60	67	71	79	88	90	94	97	100	108	116	122
1	5	9	16	24	31	36	39	41	44	56	60	67	68	79	88	90	94	97	100	107	119	122
1	5	9	16	24	31	36	39	41	44	56	60	67	68	79	88	90	94	97	100	107	116	122
1	5	9	16	24	31	36	39	41	44	56	60	67	68	79	88	90	94	97	100	108	119	122
1	5	9	16	24	31	36	39	41	44	56	60	67	68	79	88	90	94	97	100	108	116	122
1	5	9	16	24	31	36	39	41	44	56	60	64	71	79	88	90	94	97	100	107	119	122
1	5	9	16	24	31	36	39	41	44	56	60	64	71	79	88	90	94	97	100	107	116	122
1	5	9	16	24	31	36	39	41	44	56	60	64	71	79	88	90	94	97	100	108	119	122
1	5	9	16	24	31	36	39	41	44	56	60	64	71	79	88	90	94	97	100	108	116	122
1	5	9	16	24	31	36	39	41	44	56	60	64	68	79	88	90	94	97	100	107	119	122
1	5	9	16	24	31	36	39	41	44	56	60	64	68	79	88	90	94	97	100	107	116	122
1	5	9	16	24	31	36	39	41	44	56	60	64	68	79	88	90	94	97	100	108	119	122
1	5	9	16	24	31	36	39	41	44	56	60	64	68	79	88	90	94	97	100	108	116	122
1	5	9	13	24	31	36	39	41	50	56	60	67	71	79	88	90	94	97	100	107	119	122
1	5	9	13	24	31	36	39	41	50	56	60	67	71	79	88	90	94	97	100	107	116	122
1	5	9	13	24	31	36	39	41	50	56	60	67	71	79	88	90	94	97	100	108	119	122
1	5	9	13	24	31	36	39	41	50	56	60	67	71	79	88	90	94	97	100	108	116	122
1	5	9	13	24	31	36	39	41	50	56	60	67	68	79	88	90	94	97	100	107	119	122
1	5	9	13	24	31	36	39	41	50	56	60	67	68	79	88	90	94	97	100	107	116	122
1	5	9	13	24	31	36	39	41	50	56	60	67	68	79	88	90	94	97	100	108	119	122
1	5	9	13	24	31	36	39	41	50	56	60	67	68	79	88	90	94	97	100	108	116	122
1	5	9	13	24	31	36	39	41	50	56	60	64	71	79	88	90	94	97	100	107	119	122
1	5	9	13	24	31	36	39	41	50	56	60	64	71	79	88	90	94	97	100	107	116	122
1	5	9	13	24	31	36	39	41	50	56	60	64	71	79	88	90	94	97	100	108	119	122
1	5	9	13	24	31	36	39	41	50	56	60	64	71	79	88	90	94	97	100	108	116	122
1	5	9	13	24	31	36	39	41	50	56	60	64	68	79	88	90	94	97	100	107	119	122
1	5	9	13	24	31	36	39	41	50	56	60	64	68	79	88	90	94	97	100	107	116	122
1	5	9	13	24	31	36	39	41	50	56	60	64	68	79	88	90	94	97	100	108	119	122
1	5	9	13	24	31	36	39	41	50	56	60	64	68	79	88	90	94	97	100	108	116	122
1	5	9	13	24	31	36	39	41	46	56	60	67	71	79	88	90	94	97	100	107	119	122
1	5	9	13	24	31	36	39	41	46	56	60	67	71	79	88	90	94	97	100	107	116	122
1	5	9	13	24	31	36	39	41	46	56	60	67	71	79	88	90	94	97	100	108	119	122
1	5	9	13	24	31	36	39	41	46	56	60	67	71	79	88	90	94	97	100	108	116	122
1	5	9	13	24	31	36	39	41	46	56	60	67	68	79	88	90	94	97	100	107	119	122
1	5	9	13	24	31	36	39	41	46	56	60	67	68	79	88	90	94	97	100	107	116	122
1	5	9	13	24	31	36	39	41	46	56	60	67	68	79	88	90	94	97	100	108	119	122
1	5	9	13	24	31	36	39	41	46	56	60	67	68	79	88	90	94	97	100	108	116	122
1	5	9	13	24	31	36	39	41	46	56	60	64	71	79	88	90	94	97	100	107	119	122
1	5	9	13	24	31	36	39	41	46	56	60	64	71	79	88	90	94	97	100	107	116	122
1	5	9	13	24	31	36	39	41	46	56	60	64	71	79	88	90	94	97	100	108	119	122
1	5	9	13	24	31	36	39	41	46	56	60	64	71	79	88	90	94	97	100	108	116	122
1	5	9	13	24	31	36	39	41	46	56	60	64	68	79	88	90	94	97	100	107	119	122
1	5	9	13	24	31	36	39	41	46	56	60	64	68	79	88	90	94	97	100	107	116	122
1	5	9	13	24	31	36	39	41	46	56	60	64	68	79	88	90	94	97	100	108	119	122
1	5	9	13	24	31	36	39	41	46	56	60	64	68	79	88	90	94	97	100	108	116	122
1	5	9	13	24	31	36	39	41	43	56	60	67	71	79	88	90	94	97	100	107	119	122
1	5	9	13	24	31	36	39	41	43	56	60	67	71	79	88	90	94	97	100	107	116	122
1	5	9	13	24	31	36	39	41	43	56	60	67	71	79	88	90	94	97	100	108	119	122
1	5	9	13	24	31	36	39	41	43	56	60	67	71	79	88	90	94	97	100	108	116	122
1	5	9	13	24	31	36	39	41	43	56	60	67	68	79	88	90	94	97	100	107	119	122
1	5	9	13	24	31	36	39	41	43	56	60	67	68	79	88	90	94	97	100	107	116	122
1	5	9	13	24	31	36	39	41	43	56	60	67	68	79	88	90	94	97	100	108	119	122
1	5	9	13	24	31	36	39	41	43	56	60	67	68	79	88	90	94	97	100	108	116	122
1	5	9	13	24	31	36	39	41	43	56	60	64	71	79	88	90	94	97	100	107	119	122
1	5	9	13	24	31	36	39	41	43	56	60	64	71	79	88	90	94	97	100	107	116	122
1	5	9	13	24	31	36	39	41	43	56	60	64	71	79	88	90	94	97	100	108	119	122
1	5	9	13	24	31	36	39	41	43	56	60	64	71	79	88	90	94	97	100	108	116	122
1	5	9	13	24	31	36	39	41	43	56	60	64	68	79	88	90	94	97	100	107	119	122
1	5	9	13	24	31	36	39	41	43	56	60	64	68	79	88	90	94	97	100	107	116	122
1	5	9	13	24	31	36	39	41	43	56	60	64	68	79	88	90	94	97	100	108	119	122
1	5	9	13	24	31	36	39	41	43	56	60	64	68	79	88	90	94	97	100	108	116	122
1	5	9	13	24	31	36	39	41	44	56	60	67	71	79	88	90	94	97	100	107	119	122
1	5	9	13	24	31	36	39	41	44	56	60	67	71	79	88	90	94	97	100	107	116	122
1	5	9	13	24	31	36	39	41	44	56	60	67	71	79	88	90	94	97	100	108	119	122
1	5	9	13	24	31	36	39	41	44	56	60	67	71	79	88	90	94	97	100	108	116	122
1	5	9	13	24	31	36	39	41	44	56	60	67	68	79	88	90	94	97	100	107	119	122
1	5	9	13	24	31	36	39	41	44	56	60	67	68	79	88	90	94	97	100	107	116	122
1	5	9	13	24	31	36	39	41	44	56	60	67	68	79	88	90	94	97	100	108	119	122
1	5	9	13	24	31	36	39	41	44	56	60	67	68	79	88	90	94	97	100	108	116	122
1	5	9	13	24	31	36	39	41	44	56	60	64	71	79	88	90	94	97	100	107	119	122
1	5	9	13	24	31	36	39	41	44	56	60	64	71	79	88	90	94	97	100	107	116	122
1	5	9	13	24	31	36	39	41	44	56	60	64	71	79	88	90	94	97	100	108	119	122
1	5	9	13	24	31	36	39	41	44	56	60	64	71	79	88	90	94	97	100	108	116	122
1	5	9	13	24	31	36	39	41	44	56	60	64	68	79	88	90	94	97	100	107	119	122
1	5	9	13	24	31	36	39	41	44	56	60	64	68	79	88	90	94	97	100	107	116	122
1	5	9	13	24	31	36	39	41	44	56	60	64	68	79	88	90	94	97	100	108	119	122
1	5	9	13	24	31	36	39	41	44	56	60	64	68	79	88	90	94	97	100	108	116	122
1	6	12	21	24	31	36	39	41	50	56	60	67	71	79	88	90	94	97	100	107	119	122
1	6	12	21	24	31	36	39	41	50	56	60	67	71	79	88	90	94	97	100	107	116	122
1	6	12	21	24	31	36	39	41	50	56	60	67	71	79	88	90	94	97	100	108	119	122
1	6	12	21	24	31	36	39	41	50	56	60	67	71	79	88	90	94	97	100	108	116	122
1	6	12	21	24	31	36	39	41	50	56	60	67	68	79	88	90	94	97	100	107	119	122
1	6	12	21	24	31	36	39	41	50	56	60	67	68	79	88	90	94	97	100	107	116	122
1	6	12	21	24	31	36	39	41	50	56	60	67	68	79	88	90	94	97	100	108	119	122
1	6	12	21	24	31	36	39	41	50	56	60	67	68	79	88	90	94	97	100	108	116	122
1	6	12	21	24	31	36	39	41	50	56	60	64	71	79	88	90	94	97	100	107	119	122
1	6	12	21	24	31	36	39	41	50	56	60	64	71	79	88	90	94	97	100	107	116	122
1	6	12	21	24	31	36	39	41	50	56	60	64	71	79	88	90	94	97	100	108	119	122
1	6	12	21	24	31	36	39	41	50	56	60	64	71	79	88	90	94	97	100	108	116	122
1	6	12	21	24	31	36	39	41	50	56	60	64	68	79	88	90	94	97	100	107	119	122
1	6	12	21	24	31	36	39	41	50	56	60	64	68	79	88	90	94	97	100	107	116	122
1	6	12	21	24	31	36	39	41	50	56	60	64	68	79	88	90	94	97	100	108	119	122
1	6	12	21	24	31	36	39	41	50	56	60	64	68	79	88	90	94	97	100	108	116	122
1	6	12	21	24	31	36	39	41	46	56	60	67	71	79	88	90	94	97	100	107	119	122
1	6	12	21	24	31	36	39	41	46	56	60	67	71	79	88	90	94	97	100	107	116	122
1	6	12	21	24	31	36	39	41	46	56	60	67	71	79	88	90	94	97	100	108	119	122
1	6	12	21	24	31	36	39	41	46	56	60	67	71	79	88	90	94	97	100	108	116	122
1	6	12	21	24	31	36	39	41	46	56	60	67	68	79	88	90	94	97	100	107	119	122
1	6	12	21	24	31	36	39	41	46	56	60	67	68	79	88	90	94	97	100	107	116	122
1	6	12	21	24	31	36	39	41	46	56	60	67	68	79	88	90	94	97	100	108	119	122
1	6	12	21	24	31	36	39	41	46	56	60	67	68	79	88	90	94	97	100	108	116	122
1	6	12	21	24	31	36	39	41	46	56	60	64	71	79	88	90	94	97	100	107	119	122
1	6	12	21	24	31	36	39	41	46	56	60	64	71	79	88	90	94	97	100	107	116	122
1	6	12	21	24	31	36	39	41	46	56	60	64	71	79	88	90	94	97	100	108	119	122
1	6	12	21	24	31	36	39	41	46	56	60	64	71	79	88	90	94	97	100	108	116	122
1	6	12	21	24	31	36	39	41	46	56	60	64	68	79	88	90	94	97	100	107	119	122
1	6	12	21	24	31	36	39	41	46	56	60	64	68	79	88	90	94	97	100	107	116	122
1	6	12	21	24	31	36	39	41	46	56	60	64	68	79	88	90	94	97	100	108	119	122
1	6	12	21	24	31	36	39	41	46	56	60	64	68	79	88	90	94	97	100	108	116	122
1	6	12	21	24	31	36	39	41	43	56	60	67	71	79	88	90	94	97	100	107	119	122
1	6	12	21	24	31	36	39	41	43	56	60	67	71	79	88	90	94	97	100	107	116	122
1	6	12	21	24	31	36	39	41	43	56	60	67	71	79	88	90	94	97	100	108	119	122
1	6	12	21	24	31	36	39	41	43	56	60	67	71	79	88	90	94	97	100	108	116	122
1	6	12	21	24	31	36	39	41	43	56	60	67	68	79	88	90	94	97	100	107	119	122
1	6	12	21	24	31	36	39	41	43	56	60	67	68	79	88	90	94	97	100	107	116	122
1	6	12	21	24	31	36	39	41	43	56	60	67	68	79	88	90	94	97	100	108	119	122
1	6	12	21	24	31	36	39	41	43	56	60	67	68	79	88	90	94	97	100	108	116	122
1	6	12	21	24	31	36	39	41	43	56	60	64	71	79	88	90	94	97	100	107	119	122
1	6	12	21	24	31	36	39	41	43	56	60	64	71	79	88	90	94	97	100	107	116	122
1	6	12	21	24	31	36	39	41	43	56	60	64	71	79	88	90	94	97	100	108	119	122
1	6	12	21	24	31	36	39	41	43	56	60	64	71	79	88	90	94	97	100	108	116	122
1	6	12	21	24	31	36	39	41	43	56	60	64	68	79	88	90	94	97	100	107	119	122
1	6	12	21	24	31	36	39	41	43	56	60	64	68	79	88	90	94	97	100	107	116	122
1	6	12	21	24	31	36	39	41	43	56	60	64	68	79	88	90	94	97	100	108	119	122
1	6	12	21	24	31	36	39	41	43	56	60	64	68	79	88	90	94	97	100	108	116	122
1	6	12	21	24	31	36	39	41	44	56	60	67	71	79	88	90	94	97	100	107	119	122
1	6	12	21	24	31	36	39	41	44	56	60	67	71	79	88	90	94	97	100	107	116	122
1	6	12	21	24	31	36	39	41	44	56	60	67	71	79	88	90	94	97	100	108	119	122
1	6	12	21	24	31	36	39	41	44	56	60	67	71	79	88	90	94	97	100	108	116	122
1	6	12	21	24	31	36	39	41	44	56	60	67	68	79	88	90	94	97	100	107	119	122
1	6	12	21	24	31	36	39	41	44	56	60	67	68	79	88	90	94	97	100	107	116	122
1	6	12	21	24	31	36	39	41	44	56	60	67	68	79	88	90	94	97	100	108	119	122
1	6	12	21	24	31	36	39	41	44	56	60	67	68	79	88	90	94	97	100	108	116	122
1	6	12	21	24	31	36	39	41	44	56	60	64	71	79	88	90	94	97	100	107	119	122
1	6	12	21	24	31	36	39	41	44	56	60	64	71	79	88	90	94	97	100	107	116	122
1	6	12	21	24	31	36	39	41	44	56	60	64	71	79	88	90	94	97	100	108	119	122
1	6	12	21	24	31	36	39	41	44	56	60	64	71	79	88	90	94	97	100	108	116	122
1	6	12	21	24	31	36	39	41	44	56	60	64	68	79	88	90	94	97	100	107	119	122
1	6	12	21	24	31	36	39	41	44	56	60	64	68	79	88	90	94	97	100	107	116	122
1	6	12	21	24	31	36	39	41	44	56	60	64	68	79	88	90	94	97	100	108	119	122
1	6	12	21	24	31	36	39	41	44	56	60	64	68	79	88	90	94	97	100	108	116	122
1	6	12	16	24	31	36	39	41	50	56	60	67	71	79	88	90	94	97	100	107	119	122
1	6	12	16	24	31	36	39	41	50	56	60	67	71	79	88	90	94	97	100	107	116	122
1	6	12	16	24	31	36	39	41	50	56	60	67	71	79	88	90	94	97	100	108	119	122
1	6	12	16	24	31	36	39	41	50	56	60	67	71	79	88	90	94	97	100	108	116	122
1	6	12	16	24	31	36	39	41	50	56	60	67	68	79	88	90	94	97	100	107	119	122
1	6	12	16	24	31	36	39	41	50	56	60	67	68	79	88	90	94	97	100	107	116	122
1	6	12	16	24	31	36	39	41	50	56	60	67	68	79	88	90	94	97	100	108	119	122
1	6	12	16	24	31	36	39	41	50	56	60	67	68	79	88	90	94	97	100	108	116	122
1	6	12	16	24	31	36	39	41	50	56	60	64	71	79	88	90	94	97	100	107	119	122
1	6	12	16	24	31	36	39	41	50	56	60	64	71	79	88	90	94	97	100	107	116	122
1	6	12	16	24	31	36	39	41	50	56	60	64	71	79	88	90	94	97	100	108	119	122
1	6	12	16	24	31	36	39	41	50	56	60	64	71	79	88	90	94	97	100	108	116	122
1	6	12	16	24	31	36	39	41	50	56	60	64	68	79	88	90	94	97	100	107	119	122
1	6	12	16	24	31	36	39	41	50	56	60	64	68	79	88	90	94	97	100	107	116	122
1	6	12	16	24	31	36	39	41	50	56	60	64	68	79	88	90	94	97	100	108	119	122
1	6	12	16	24	31	36	39	41	50	56	60	64	68	79	88	90	94	97	100	108	116	122
1	6	12	16	24	31	36	39	41	46	56	60	67	71	79	88	90	94	97	100	107	119	122
1	6	12	16	24	31	36	39	41	46	56	60	67	71	79	88	90	94	97	100	107	116	122
1	6	12	16	24	31	36	39	41	46	56	60	67	71	79	88	90	94	97	100	108	119	122
1	6	12	16	24	31	36	39	41	46	56	60	67	71	79	88	90	94	97	100	108	116	122
1	6	12	16	24	31	36	39	41	46	56	60	67	68	79	88	90	94	97	100	107	119	122
1	6	12	16	24	31	36	39	41	46	56	60	67	68	79	88	90	94	97	100	107	116	122
1	6	12	16	24	31	36	39	41	46	56	60	67	68	79	88	90	94	97	100	108	119	122
1	6	12	16	24	31	36	39	41	46	56	60	67	68	79	88	90	94	97	100	108	116	122
1	6	12	16	24	31	36	39	41	46	56	60	64	71	79	88	90	94	97	100	107	119	122
1	6	12	16	24	31	36	39	41	46	56	60	64	71	79	88	90	94	97	100	107	116	122
1	6	12	16	24	31	36	39	41	46	56	60	64	71	79	88	90	94	97	100	108	119	122
1	6	12	16	24	31	36	39	41	46	56	60	64	71	79	88	90	94	97	100	108	116	122
1	6	12	16	24	31	36	39	41	46	56	60	64	68	79	88	90	94	97	100	107	119	122
1	6	12	16	24	31	36	39	41	46	56	60	64	68	79	88	90	94	97	100	107	116	122
1	6	12	16	24	31	36	39	41	46	56	60	64	68	79	88	90	94	97	100	108	119	122
1	6	12	16	24	31	36	39	41	46	56	60	64	68	79	88	90	94	97	100	108	116	122
1	6	12	16	24	31	36	39	41	43	56	60	67	71	79	88	90	94	97	100	107	119	122
1	6	12	16	24	31	36	39	41	43	56	60	67	71	79	88	90	94	97	100	107	116	122
1	6	12	16	24	31	36	39	41	43	56	60	67	71	79	88	90	94	97	100	108	119	122
1	6	12	16	24	31	36	39	41	43	56	60	67	71	79	88	90	94	97	100	108	116	122
1	6	12	16	24	31	36	39	41	43	56	60	67	68	79	88	90	94	97	100	107	119	122
1	6	12	16	24	31	36	39	41	43	56	60	67	68	79	88	90	94	97	100	107	116	122
1	6	12	16	24	31	36	39	41	43	56	60	67	68	79	88	90	94	97	100	108	119	122
1	6	12	16	24	31	36	39	41	43	56	60	67	68	79	88	90	94	97	100	108	116	122
1	6	12	16	24	31	36	39	41	43	56	60	64	71	79	88	90	94	97	100	107	119	122
1	6	12	16	24	31	36	39	41	43	56	60	64	71	79	88	90	94	97	100	107	116	122
1	6	12	16	24	31	36	39	41	43	56	60	64	71	79	88	90	94	97	100	108	119	122
1	6	12	16	24	31	36	39	41	43	56	60	64	71	79	88	90	94	97	100	108	116	122
1	6	12	16	24	31	36	39	41	43	56	60	64	68	79	88	90	94	97	100	107	119	122
1	6	12	16	24	31	36	39	41	43	56	60	64	68	79	88	90	94	97	100	107	116	122
1	6	12	16	24	31	36	39	41	43	56	60	64	68	79	88	90	94	97	100	108	119	122
1	6	12	16	24	31	36	39	41	43	56	60	64	68	79	88	90	94	97	100	108	116	122
1	6	12	16	24	31	36	39	41	44	56	60	67	71	79	88	90	94	97	100	107	119	122
1	6	12	16	24	31	36	39	41	44	56	60	67	71	79	88	90	94	97	100	107	116	122
1	6	12	16	24	31	36	39	41	44	56	60	67	71	79	88	90	94	97	100	108	119	122
1	6	12	16	24	31	36	39	41	44	56	60	67	71	79	88	90	94	97	100	108	116	122
1	6	12	16	24	31	36	39	41	44	56	60	67	68	79	88	90	94	97	100	107	119	122
1	6	12	16	24	31	36	39	41	44	56	60	67	68	79	88	90	94	97	100	107	116	122
1	6	12	16	24	31	36	39	41	44	56	60	67	68	79	88	90	94	97	100	108	119	122
1	6	12	16	24	31	36	39	41	44	56	60	67	68	79	88	90	94	97	100	108	116	122
1	6	12	16	24	31	36	39	41	44	56	60	64	71	79	88	90	94	97	100	107	119	122
1	6	12	16	24	31	36	39	41	44	56	60	64	71	79	88	90	94	97	100	107	116	122
1	6	12	16	24	31	36	39	41	44	56	60	64	71	79	88	90	94	97	100	108	119	122
1	6	12	16	24	31	36	39	41	44	56	60	64	71	79	88	90	94	97	100	108	116	122
1	6	12	16	24	31	36	39	41	44	56	60	64	68	79	88	90	94	97	100	107	119	122
1	6	12	16	24	31	36	39	41	44	56	60	64	68	79	88	90	94	97	100	107	116	122
1	6	12	16	24	31	36	39	41	44	56	60	64	68	79	88	90	94	97	100	108	119	122
1	6	12	16	24	31	36	39	41	44	56	60	64	68	79	88	90	94	97	100	108	116	122
1	6	12	16	24	31	36	39	41	50	56	60	67	71	79	88	90	94	97	100	107	119	122
1	6	12	16	24	31	36	39	41	50	56	60	67	71	79	88	90	94	97	100	107	116	122
1	6	12	16	24	31	36	39	41	50	56	60	67	71	79	88	90	94	97	100	108	119	122
1	6	12	16	24	31	36	39	41	50	56	60	67	71	79	88	90	94	97	100	108	116	122
1	6	12	16	24	31	36	39	41	50	56	60	67	68	79	88	90	94	97	100	107	119	122
1	6	12	16	24	31	36	39	41	50	56	60	67	68	79	88	90	94	97	100	107	116	122
1	6	12	16	24	31	36	39	41	50	56	60	67	68	79	88	90	94	97	100	108	119	122
1	6	12	16	24	31	36	39	41	50	56	60	67	68	79	88	90	94	97	100	108	116	122
1	6	12	16	24	31	36	39	41	50	56	60	64	71	79	88	90	94	97	100	107	119	122
1	6	12	16	24	31	36	39	41	50	56	60	64	71	79	88	90	94	97	100	107	116	122
1	6	12	16	24	31	36	39	41	50	56	60	64	71	79	88	90	94	97	100	108	119	122
1	6	12	16	24	31	36	39	41	50	56	60	64	71	79	88	90	94	97	100	108	116	122
1	6	12	16	24	31	36	39	41	50	56	60	64	68	79	88	90	94	97	100	107	119	122
1	6	12	16	24	31	36	39	41	50	56	60	64	68	79	88	90	94	97	100	107	116	122
1	6	12	16	24	31	36	39	41	50	56	60	64	68	79	88	90	94	97	100	108	119	122
1	6	12	16	24	31	36	39	41	50	56	60	64	68	79	88	90	94	97	100	108	116	122
1	6	12	16	24	31	36	39	41	46	56	60	67	71	79	88	90	94	97	100	107	119	122
1	6	12	16	24	31	36	39	41	46	56	60	67	71	79	88	90	94	97	100	107	116	122
1	6	12	16	24	31	36	39	41	46	56	60	67	71	79	88	90	94	97	100	108	119	122
1	6	12	16	24	31	36	39	41	46	56	60	67	71	79	88	90	94	97	100	108	116	122
1	6	12	16	24	31	36	39	41	46	56	60	67	68	79	88	90	94	97	100	107	119	122
1	6	12	16	24	31	36	39	41	46	56	60	67	68	79	88	90	94	97	100	107	116	122
1	6	12	16	24	31	36	39	41	46	56	60	67	68	79	88	90	94	97	100	108	119	122
1	6	12	16	24	31	36	39	41	46	56	60	67	68	79	88	90	94	97	100	108	116	122
1	6	12	16	24	31	36	39	41	46	56	60	64	71	79	88	90	94	97	100	107	119	122
1	6	12	16	24	31	36	39	41	46	56	60	64	71	79	88	90	94	97	100	107	116	122
1	6	12	16	24	31	36	39	41	46	56	60	64	71	79	88	90	94	97	100	108	119	122
1	6	12	16	24	31	36	39	41	46	56	60	64	71	79	88	90	94	97	100	108	116	122
1	6	12	16	24	31	36	39	41	46	56	60	64	68	79	88	90	94	97	100	107	119	122
1	6	12	16	24	31	36	39	41	46	56	60	64	68	79	88	90	94	97	100	107	116	122
1	6	12	16	24	31	36	39	41	46	56	60	64	68	79	88	90	94	97	100	108	119	122
1	6	12	16	24	31	36	39	41	46	56	60	64	68	79	88	90	94	97	100	108	116	122
1	6	12	16	24	31	36	39	41	43	56	60	67	71	79	88	90	94	97	100	107	119	122
1	6	12	16	24	31	36	39	41	43	56	60	67	71	79	88	90	94	97	100	107	116	122
1	6	12	16	24	31	36	39	41	43	56	60	67	71	79	88	90	94	97	100	108	119	122
1	6	12	16	24	31	36	39	41	43	56	60	67	71	79	88	90	94	97	100	108	116	122
1	6	12	16	24	31	36	39	41	43	56	60	67	68	79	88	90	94	97	100	107	119	122
1	6	12	16	24	31	36	39	41	43	56	60	67	68	79	88	90	94	97	100	107	116	122
1	6	12	16	24	31	36	39	41	43	56	60	67	68	79	88	90	94	97	100	108	119	122
1	6	12	16	24	31	36	39	41	43	56	60	67	68	79	88	90	94	97	100	108	116	122
1	6	12	16	24	31	36	39	41	43	56	60	64	71	79	88	90	94	97	100	107	119	122
1	6	12	16	24	31	36	39	41	43	56	60	64	71	79	88	90	94	97	100	107	116	122
1	6	12	16	24	31	36	39	41	43	56	60	64	71	79	88	90	94	97	100	108	119	122
1	6	12	16	24	31	36	39	41	43	56	60	64	71	79	88	90	94	97	100	108	116	122
1	6	12	16	24	31	36	39	41	43	56	60	64	68	79	88	90	94	97	100	107	119	122
1	6	12	16	24	31	36	39	41	43	56	60	64	68	79	88	90	94	97	100	107	116	122
1	6	12	16	24	31	36	39	41	43	56	60	64	68	79	88	90	94	97	100	108	119	122
1	6	12	16	24	31	36	39	41	43	56	60	64	68	79	88	90	94	97	100	108	116	122
1	6	12	16	24	31	36	39	41	44	56	60	67	71	79	88	90	94	97	100	107	119	122
1	6	12	16	24	31	36	39	41	44	56	60	67	71	79	88	90	94	97	100	107	116	122
1	6	12	16	24	31	36	39	41	44	56	60	67	71	79	88	90	94	97	100	108	119	122
1	6	12	16	24	31	36	39	41	44	56	60	67	71	79	88	90	94	97	100	108	116	122
1	6	12	16	24	31	36	39	41	44	56	60	67	68	79	88	90	94	97	100	107	119	122
1	6	12	16	24	31	36	39	41	44	56	60	67	68	79	88	90	94	97	100	107	116	122
1	6	12	16	24	31	36	39	41	44	56	60	67	68	79	88	90	94	97	100	108	119	122
1	6	12	16	24	31	36	39	41	44	56	60	67	68	79	88	90	94	97	100	108	116	122
1	6	12	16	24	31	36	39	41	44	56	60	64	71	79	88	90	94	97	100	107	119	122
1	6	12	16	24	31	36	39	41	44	56	60	64	71	79	88	90	94	97	100	107	116	122
1	6	12	16	24	31	36	39	41	44	56	60	64	71	79	88	90	94	97	100	108	119	122
1	6	12	16	24	31	36	39	41	44	56	60	64	71	79	88	90	94	97	100	108	116	122
1	6	12	16	24	31	36	39	41	44	56	60	64	68	79	88	90	94	97	100	107	119	122
1	6	12	16	24	31	36	39	41	44	56	60	64	68	79	88	90	94	97	100	107	116	122
1	6	12	16	24	31	36	39	41	44	56	60	64	68	79	88	90	94	97	100	108	119	122
1	6	12	16	24	31	36	39	41	44	56	60	64	68	79	88	90	94	97	100	108	116	122
1	6	12	13	24	31	36	39	41	50	56	60	67	71	79	88	90	94	97	100	107	119	122
1	6	12	13	24	31	36	39	41	50	56	60	67	71	79	88	90	94	97	100	107	116	122
1	6	12	13	24	31	36	39	41	50	56	60	67	71	79	88	90	94	97	100	108	119	122
1	6	12	13	24	31	36	39	41	50	56	60	67	71	79	88	90	94	97	100	108	116	122
1	6	12	13	24	31	36	39	41	50	56	60	67	68	79	88	90	94	97	100	107	119	122
1	6	12	13	24	31	36	39	41	50	56	60	67	68	79	88	90	94	97	100	107	116	122
1	6	12	13	24	31	36	39	41	50	56	60	67	68	79	88	90	94	97	100	108	119	122
1	6	12	13	24	31	36	39	41	50	56	60	67	68	79	88	90	94	97	100	108	116	122
1	6	12	13	24	31	36	39	41	50	56	60	64	71	79	88	90	94	97	100	107	119	122
1	6	12	13	24	31	36	39	41	50	56	60	64	71	79	88	90	94	97	100	107	116	122
1	6	12	13	24	31	36	39	41	50	56	60	64	71	79	88	90	94	97	100	108	119	122
1	6	12	13	24	31	36	39	41	50	56	60	64	71	79	88	90	94	97	100	108	116	122
1	6	12	13	24	31	36	39	41	50	56	60	64	68	79	88	90	94	97	100	107	119	122
1	6	12	13	24	31	36	39	41	50	56	60	64	68	79	88	90	94	97	100	107	116	122
1	6	12	13	24	31	36	39	41	50	56	60	64	68	79	88	90	94	97	100	108	119	122
1	6	12	13	24	31	36	39	41	50	56	60	64	68	79	88	90	94	97	100	108	116	122
1	6	12	13	24	31	36	39	41	46	56	60	67	71	79	88	90	94	97	100	107	119	122
1	6	12	13	24	31	36	39	41	46	56	60	67	71	79	88	90	94	97	100	107	116	122
1	6	12	13	24	31	36	39	41	46	56	60	67	71	79	88	90	94	97	100	108	119	122
1	6	12	13	24	31	36	39	41	46	56	60	67	71	79	88	90	94	97	100	108	116	122
1	6	12	13	24	31	36	39	41	46	56	60	67	68	79	88	90	94	97	100	107	119	122
1	6	12	13	24	31	36	39	41	46	56	60	67	68	79	88	90	94	97	100	107	116	122
1	6	12	13	24	31	36	39	41	46	56	60	67	68	79	88	90	94	97	100	108	119	122
1	6	12	13	24	31	36	39	41	46	56	60	67	68	79	88	90	94	97	100	108	116	122
1	6	12	13	24	31	36	39	41	46	56	60	64	71	79	88	90	94	97	100	107	119	122
1	6	12	13	24	31	36	39	41	46	56	60	64	71	79	88	90	94	97	100	107	116	122
1	6	12	13	24	31	36	39	41	46	56	60	64	71	79	88	90	94	97	100	108	119	122
1	6	12	13	24	31	36	39	41	46	56	60	64	71	79	88	90	94	97	100	108	116	122
1	6	12	13	24	31	36	39	41	46	56	60	64	68	79	88	90	94	97	100	107	119	122
1	6	12	13	24	31	36	39	41	46	56	60	64	68	79	88	90	94	97	100	107	116	122
1	6	12	13	24	31	36	39	41	46	56	60	64	68	79	88	90	94	97	100	108	119	122
1	6	12	13	24	31	36	39	41	46	56	60	64	68	79	88	90	94	97	100	108	116	122
1	6	12	13	24	31	36	39	41	43	56	60	67	71	79	88	90	94	97	100	107	119	122
1	6	12	13	24	31	36	39	41	43	56	60	67	71	79	88	90	94	97	100	107	116	122
1	6	12	13	24	31	36	39	41	43	56	60	67	71	79	88	90	94	97	100	108	119	122
1	6	12	13	24	31	36	39	41	43	56	60	67	71	79	88	90	94	97	100	108	116	122
1	6	12	13	24	31	36	39	41	43	56	60	67	68	79	88	90	94	97	100	107	119	122
1	6	12	13	24	31	36	39	41	43	56	60	67	68	79	88	90	94	97	100	107	116	122
1	6	12	13	24	31	36	39	41	43	56	60	67	68	79	88	90	94	97	100	108	119	122
1	6	12	13	24	31	36	39	41	43	56	60	67	68	79	88	90	94	97	100	108	116	122
1	6	12	13	24	31	36	39	41	43	56	60	64	71	79	88	90	94	97	100	107	119	122
1	6	12	13	24	31	36	39	41	43	56	60	64	71	79	88	90	94	97	100	107	116	122
1	6	12	13	24	31	36	39	41	43	56	60	64	71	79	88	90	94	97	100	108	119	122
1	6	12	13	24	31	36	39	41	43	56	60	64	71	79	88	90	94	97	100	108	116	122
1	6	12	13	24	31	36	39	41	43	56	60	64	68	79	88	90	94	97	100	107	119	122
1	6	12	13	24	31	36	39	41	43	56	60	64	68	79	88	90	94	97	100	107	116	122
1	6	12	13	24	31	36	39	41	43	56	60	64	68	79	88	90	94	97	100	108	119	122
1	6	12	13	24	31	36	39	41	43	56	60	64	68	79	88	90	94	97	100	108	116	122
1	6	12	13	24	31	36	39	41	44	56	60	67	71	79	88	90	94	97	100	107	119	122
1	6	12	13	24	31	36	39	41	44	56	60	67	71	79	88	90	94	97	100	107	116	122
1	6	12	13	24	31	36	39	41	44	56	60	67	71	79	88	90	94	97	100	108	119	122
1	6	12	13	24	31	36	39	41	44	56	60	67	71	79	88	90	94	97	100	108	116	122
1	6	12	13	24	31	36	39	41	44	56	60	67	68	79	88	90	94	97	100	107	119	122
1	6	12	13	24	31	36	39	41	44	56	60	67	68	79	88	90	94	97	100	107	116	122
1	6	12	13	24	31	36	39	41	44	56	60	67	68	79	88	90	94	97	100	108	119	122
1	6	12	13	24	31	36	39	41	44	56	60	67	68	79	88	90	94	97	100	108	116	122
1	6	12	13	24	31	36	39	41	44	56	60	64	71	79	88	90	94	97	100	107	119	122
1	6	12	13	24	31	36	39	41	44	56	60	64	71	79	88	90	94	97	100	107	116	122
1	6	12	13	24	31	36	39	41	44	56	60	64	71	79	88	90	94	97	100	108	119	122
1	6	12	13	24	31	36	39	41	44	56	60	64	71	79	88	90	94	97	100	108	116	122
1	6	12	13	24	31	36	39	41	44	56	60	64	68	79	88	90	94	97	100	107	119	122
1	6	12	13	24	31	36	39	41	44	56	60	64	68	79	88	90	94	97	100	107	116	122
1	6	12	13	24	31	36	39	41	44	56	60	64	68	79	88	90	94	97	100	108	119	122
1	6	12	13	24	31	36	39	41	44	56	60	64	68	79	88	90	94	97	100	108	116	122
1	6	9	21	24	31	36	39	41	50	56	60	67	71	79	88	90	94	97	100	107	119	122
1	6	9	21	24	31	36	39	41	50	56	60	67	71	79	88	90	94	97	100	107	116	122
1	6	9	21	24	31	36	39	41	50	56	60	67	71	79	88	90	94	97	100	108	119	122
1	6	9	21	24	31	36	39	41	50	56	60	67	71	79	88	90	94	97	100	108	116	122
1	6	9	21	24	31	36	39	41	50	56	60	67	68	79	88	90	94	97	100	107	119	122
1	6	9	21	24	31	36	39	41	50	56	60	67	68	79	88	90	94	97	100	107	116	122
1	6	9	21	24	31	36	39	41	50	56	60	67	68	79	88	90	94	97	100	108	119	122
1	6	9	21	24	31	36	39	41	50	56	60	67	68	79	88	90	94	97	100	108	116	122
1	6	9	21	24	31	36	39	41	50	56	60	64	71	79	88	90	94	97	100	107	119	122
1	6	9	21	24	31	36	39	41	50	56	60	64	71	79	88	90	94	97	100	107	116	122
1	6	9	21	24	31	36	39	41	50	56	60	64	71	79	88	90	94	97	100	108	119	122
1	6	9	21	24	31	36	39	41	50	56	60	64	71	79	88	90	94	97	100	108	116	122
1	6	9	21	24	31	36	39	41	50	56	60	64	68	79	88	90	94	97	100	107	119	122
1	6	9	21	24	31	36	39	41	50	56	60	64	68	79	88	90	94	97	100	107	116	122
1	6	9	21	24	31	36	39	41	50	56	60	64	68	79	88	90	94	97	100	108	119	122
1	6	9	21	24	31	36	39	41	50	56	60	64	68	79	88	90	94	97	100	108	116	122
1	6	9	21	24	31	36	39	41	46	56	60	67	71	79	88	90	94	97	100	107	119	122
1	6	9	21	24	31	36	39	41	46	56	60	67	71	79	88	90	94	97	100	107	116	122
1	6	9	21	24	31	36	39	41	46	56	60	67	71	79	88	90	94	97	100	108	119	122
1	6	9	21	24	31	36	39	41	46	56	60	67	71	79	88	90	94	97	100	108	116	122
1	6	9	21	24	31	36	39	41	46	56	60	67	68	79	88	90	94	97	100	107	119	122
1	6	9	21	24	31	36	39	41	46	56	60	67	68	79	88	90	94	97	100	107	116	122
1	6	9	21	24	31	36	39	41	46	56	60	67	68	79	88	90	94	97	100	108	119	122
1	6	9	21	24	31	36	39	41	46	56	60	67	68	79	88	90	94	97	100	108	116	122
1	6	9	21	24	31	36	39	41	46	56	60	64	71	79	88	90	94	97	100	107	119	122
1	6	9	21	24	31	36	39	41	46	56	60	64	71	79	88	90	94	97	100	107	116	122
1	6	9	21	24	31	36	39	41	46	56	60	64	71	79	88	90	94	97	100	108	119	122
1	6	9	21	24	31	36	39	41	46	56	60	64	71	79	88	90	94	97	100	108	116	122
1	6	9	21	24	31	36	39	41	46	56	60	64	68	79	88	90	94	97	100	107	119	122
1	6	9	21	24	31	36	39	41	46	56	60	64	68	79	88	90	94	97	100	107	116	122
1	6	9	21	24	31	36	39	41	46	56	60	64	68	79	88	90	94	97	100	108	119	122
1	6	9	21	24	31	36	39	41	46	56	60	64	68	79	88	90	94	97	100	108	116	122
1	6	9	21	24	31	36	39	41	43	56	60	67	71	79	88	90	94	97	100	107	119	122
1	6	9	21	24	31	36	39	41	43	56	60	67	71	79	88	90	94	97	100	107	116	122
1	6	9	21	24	31	36	39	41	43	56	60	67	71	79	88	90	94	97	100	108	119	122
1	6	9	21	24	31	36	39	41	43	56	60	67	71	79	88	90	94	97	100	108	116	122
1	6	9	21	24	31	36	39	41	43	56	60	67	68	79	88	90	94	97	100	107	119	122
1	6	9	21	24	31	36	39	41	43	56	60	67	68	79	88	90	94	97	100	107	116	122
1	6	9	21	24	31	36	39	41	43	56	60	67	68	79	88	90	94	97	100	108	119	122
1	6	9	21	24	31	36	39	41	43	56	60	67	68	79	88	90	94	97	100	108	116	122
1	6	9	21	24	31	36	39	41	43	56	60	64	71	79	88	90	94	97	100	107	119	122
1	6	9	21	24	31	36	39	41	43	56	60	64	71	79	88	90	94	97	100	107	116	122
1	6	9	21	24	31	36	39	41	43	56	60	64	71	79	88	90	94	97	100	108	119	122
1	6	9	21	24	31	36	39	41	43	56	60	64	71	79	88	90	94	97	100	108	116	122
1	6	9	21	24	31	36	39	41	43	56	60	64	68	79	88	90	94	97	100	107	119	122
1	6	9	21	24	31	36	39	41	43	56	60	64	68	79	88	90	94	97	100	107	116	122
1	6	9	21	24	31	36	39	41	43	56	60	64	68	79	88	90	94	97	100	108	119	122
1	6	9	21	24	31	36	39	41	43	56	60	64	68	79	88	90	94	97	100	108	116	122
1	6	9	21	24	31	36	39	41	44	56	60	67	71	79	88	90	94	97	100	107	119	122
1	6	9	21	24	31	36	39	41	44	56	60	67	71	79	88	90	94	97	100	107	116	122
1	6	9	21	24	31	36	39	41	44	56	60	67	71	79	88	90	94	97	100	108	119	122
1	6	9	21	24	31	36	39	41	44	56	60	67	71	79	88	90	94	97	100	108	116	122
1	6	9	21	24	31	36	39	41	44	56	60	67	68	79	88	90	94	97	100	107	119	122
1	6	9	21	24	31	36	39	41	44	56	60	67	68	79	88	90	94	97	100	107	116	122
1	6	9	21	24	31	36	39	41	44	56	60	67	68	79	88	90	94	97	100	108	119	122
1	6	9	21	24	31	36	39	41	44	56	60	67	68	79	88	90	94	97	100	108	116	122
1	6	9	21	24	31	36	39	41	44	56	60	64	71	79	88	90	94	97	100	107	119	122
1	6	9	21	24	31	36	39	41	44	56	60	64	71	79	88	90	94	97	100	107	116	122
1	6	9	21	24	31	36	39	41	44	56	60	64	71	79	88	90	94	97	100	108	119	122
1	6	9	21	24	31	36	39	41	44	56	60	64	71	79	88	90	94	97	100	108	116	122
1	6	9	21	24	31	36	39	41	44	56	60	64	68	79	88	90	94	97	100	107	119	122
1	6	9	21	24	31	36	39	41	44	56	60	64	68	79	88	90	94	97	100	107	116	122
1	6	9	21	24	31	36	39	41	44	56	60	64	68	79	88	90	94	97	100	108	119	122
1	6	9	21	24	31	36	39	41	44	56	60	64	68	79	88	90	94	97	100	108	116	122
1	6	9	16	24	31	36	39	41	50	56	60	67	71	79	88	90	94	97	100	107	119	122
1	6	9	16	24	31	36	39	41	50	56	60	67	71	79	88	90	94	97	100	107	116	122
1	6	9	16	24	31	36	39	41	50	56	60	67	71	79	88	90	94	97	100	108	119	122
1	6	9	16	24	31	36	39	41	50	56	60	67	71	79	88	90	94	97	100	108	116	122
1	6	9	16	24	31	36	39	41	50	56	60	67	68	79	88	90	94	97	100	107	119	122
1	6	9	16	24	31	36	39	41	50	56	60	67	68	79	88	90	94	97	100	107	116	122
1	6	9	16	24	31	36	39	41	50	56	60	67	68	79	88	90	94	97	100	108	119	122
1	6	9	16	24	31	36	39	41	50	56	60	67	68	79	88	90	94	97	100	108	116	122
1	6	9	16	24	31	36	39	41	50	56	60	64	71	79	88	90	94	97	100	107	119	122
1	6	9	16	24	31	36	39	41	50	56	60	64	71	79	88	90	94	97	100	107	116	122
1	6	9	16	24	31	36	39	41	50	56	60	64	71	79	88	90	94	97	100	108	119	122
1	6	9	16	24	31	36	39	41	50	56	60	64	71	79	88	90	94	97	100	108	116	122
1	6	9	16	24	31	36	39	41	50	56	60	64	68	79	88	90	94	97	100	107	119	122
1	6	9	16	24	31	36	39	41	50	56	60	64	68	79	88	90	94	97	100	107	116	122
1	6	9	16	24	31	36	39	41	50	56	60	64	68	79	88	90	94	97	100	108	119	122
1	6	9	16	24	31	36	39	41	50	56	60	64	68	79	88	90	94	97	100	108	116	122
[truncated: 6,416 more rows]
